# Supplementary material for: High evolutionary turnover of satellite families in Caenorhabditis
Source: PubMed Central journal article supplement (PMC4595182; doi:10.1186/s12862-015-0495-x), 2015-10-05
Supplement: 12862_2015_495_MOESM2_ESM.pdf [file 12862_2015_495_MOESM2_ESM.pdf]

**"High evolutionary turnover of satellite families in *Caenorhabditis*"**

JA Subirana, MM Albà and X Messeguer

**Satellite families**

These tables are also available in Additional file 1.

With different formats: Fasta and ASCII text.

## C. elegans

| Genome     | Family name             | Number of sequences | Alignment length | Score    | Consensus without gaps                                                                                                                                         |
|------------|-------------------------|---------------------|------------------|----------|----------------------------------------------------------------------------------------------------------------------------------------------------------------|
| Cele.WS201 | Cele.WS201_Fam_1_35_213 | 213                 | 56               | 0.455995 | CCGATTTGCCGGAAATTTTcAATTcCGGCAATTTG                                                                                                                            |
| Cele.WS201 | Cele.WS201_Fam_2_12_203 | 203                 | 17               | 0.556588 | CTAAGCCTAAGC                                                                                                                                                   |
| Cele.WS201 | Cele.WS201_Fam_3_34_124 | 124                 | 48               | 0.501228 | GAAATTCAAATTTTCTGnGAAAAnaTTTTGGCGG                                                                                                                             |
| Cele.WS201 | Cele.WS201_Fam_4_11_82  | 82                  | 14               | 0.622259 | GTACTGTAGGg                                                                                                                                                    |
| Cele.WS201 | Cele.WS201_Fam_5_15_65  | 65                  | 15               | 0.865855 | TCGTGGtGAGACCCa                                                                                                                                                |
| Cele.WS201 | Cele.WS201_Fam_6_19_51  | 51                  | 30               | 0.409142 | AAAATCgATAATTTtCngA                                                                                                                                            |
| Cele.WS201 | Cele.WS201_Fam_7_40_47  | 47                  | 42               | 0.770906 | AATTTTCTCGAaTTTTCTAGAAaGTTCTgAACATTCAG                                                                                                                         |
| Cele.WS201 | Cele.WS201_Fam_8_25_38  | 38                  | 29               | 0.698648 | TTTACTCTCTGGCTTCaCantaTAT                                                                                                                                      |
| Cele.WS201 | Cele.WS201_Fam_9_43_36  | 36                  | 51               | 0.566459 | TTgCCGgTTTGCCGATTTGCGGAAATTTTcAaTtCGgCAAT                                                                                                                      |
| Cele.WS201 | Cele.WS201_Fam_10_19_36 | 36                  | 21               | 0.727312 | TGttAcACGAAAAATAGAT                                                                                                                                            |
| Cele.WS201 | Cele.WS201_Fam_11_14_33 | 33                  | 17               | 0.699941 | CAAACtAcAAACTA                                                                                                                                                 |
| Cele.WS201 | Cele.WS201_Fam_12_16_29 | 29                  | 16               | 0.740353 | CTACaTGCCtACaTgC                                                                                                                                               |
| Cele.WS201 | Cele.WS201_Fam_13_32_22 | 22                  | 36               | 0.746352 | CTACAACACTACAAGTTTTGGGCGCTGCTAAgA                                                                                                                              |
| Cele.WS201 | Cele.WS201_Fam_14_17_18 | 18                  | 21               | 0.577342 | CGTAGTAAAAGAgAnnC                                                                                                                                              |
| Cele.WS201 | Cele.WS201_Fam_15_17_17 | 17                  | 20               | 0.734804 | TTGACTACCTTtGcTCA                                                                                                                                              |
| Cele.WS201 | Cele.WS201_Fam_16_19_15 | 15                  | 19               | 0.719298 | GcCAAgGCaCtaGAATtGC                                                                                                                                            |
| Cele.WS201 | Cele.WS201_Fam_17_20_14 | 14                  | 26               | 0.551212 | TTTGAATTTTTnAGtCAAAA                                                                                                                                           |
| Cele.WS201 | Cele.WS201_Fam_18_11_14 | 14                  | 11               | 0.896104 | GCACATTTTTT                                                                                                                                                    |
| Cele.WS201 | Cele.WS201_Fam_19_59_13 | 13                  | 59               | 0.784442 | AAAACCAAGTgAcAtTTgAAatTCCATaTtTnTCCATAATTTCTCaGTTTAAAAAatTTTG                                                                                                  |
| Cele.WS201 | Cele.WS201_Fam_20_37_13 | 13                  | 42               | 0.710317 | aTTTTGGCGGGAATTCAAAtTTtAAtTTTTtNAAAAt                                                                                                                          |
| Cele.WS201 | Cele.WS201_Fam_21_26_13 | 13                  | 27               | 0.730294 | cAGAGTCAcTAttTTTGGTGAAnGt                                                                                                                                      |
| Cele.WS201 | Cele.WS201_Fam_22_22_13 | 13                  | 25               | 0.504359 | GTAATCTACAnagaaActccc                                                                                                                                          |
| Cele.WS201 | Cele.WS201_Fam_23_12_13 | 13                  | 15               | 0.591738 | CCTAtACCTAtA                                                                                                                                                   |
| Cele.WS201 | Cele.WS201_Fam_24_19_12 | 12                  | 23               | 0.775582 | TTTATTTATTTAATTAATA                                                                                                                                            |
| Cele.WS201 | Cele.WS201_Fam_25_18_11 | 11                  | 21               | 0.711400 | TTAGCAGCGcCCAAAAAa                                                                                                                                             |
| Cele.WS201 | Cele.WS201_Fam_26_31_10 | 10                  | 32               | 0.784259 | TAAATAtTTAGCAGACCAaagtTgGGTaTGC                                                                                                                                |
| Cele.WS201 | Cele.WS201_Fam_27_26_9  | 9                   | 26               | 0.861823 | TTAGACCAAtTAGATGAATTTccAAAG                                                                                                                                    |
| Cele.WS201 | Cele.WS201_Fam_28_12_9  | 9                   | 19               | 0.412281 | cTACCtACCTat                                                                                                                                                   |
| Cele.WS201 | Cele.WS201_Fam_29_10_9  | 9                   | 11               | 0.717593 | GCGgtAGCGG                                                                                                                                                     |
| Cele.WS201 | Cele.WS201_Fam_30_10_9  | 9                   | 10               | 0.888889 | CgATCCATCC                                                                                                                                                     |
| Cele.WS201 | Cele.WS201_Fam_31_46_8  | 8                   | 47               | 0.692249 | ATCCTTcggAgCTGAAGGATCAGAnncAtCAGgAGGTACCCtTntG                                                                                                                 |
| Cele.WS201 | Cele.WS201_Fam_32_12_8  | 8                   | 16               | 0.598586 | ATACATATACAt                                                                                                                                                   |
| Cele.WS201 | Cele.WS201_Fam_33_12_8  | 8                   | 15               | 0.520635 | tAAAAAtaAAaA                                                                                                                                                   |
| Cele.WS201 | Cele.WS201_Fam_34_163_7 | 7                   | 168              | 0.701909 | ACTTTTGAATTTTGAaaaaAaCAGCTTTTgATnAtATTTtGAAATTTTTtAAAAAtAaACTTCCGTACAAGCTAgcATActTTGtTTGGtAtTTCTGGTAtaTTTgactATGCTGAACgTTTTaTgAAATAAAAAAGAAATgAcTcCATATGATTTTC |
| Cele.WS201 | Cele.WS201_Fam_35_63_7  | 7                   | 68               | 0.663632 | GGTCTGCTAAATcnaAnnTTGTAGTTTGTAGTCTAGCAGACCAaaTTTTntTCAAAAaccnctTg                                                                                              |
| Cele.WS201 | Cele.WS201_Fam_36_35_7  | 7                   | 36               | 0.649471 | tTtncaAAACCGGCAATtGtCGAaATTTGCCGgAAA                                                                                                                           |
| Cele.WS201 | Cele.WS201_Fam_37_35_7  | 7                   | 35               | 0.691156 | TTGCCGGAanTTTTnATTTTCGgCAAaTTGtcnaT                                                                                                                            |
| Cele.WS201 | Cele.WS201_Fam_38_31_7  | 7                   | 31               | 0.918075 | TTCTGAAaGAGCTTAAATTTACTACAAAGT                                                                                                                                 |
| Cele.WS201 | Cele.WS201_Fam_39_26_7  | 7                   | 26               | 0.733211 | CATTgCGGCGgATTTtTagaAAAaTGG                                                                                                                                    |
| Cele.WS201 | Cele.WS201_Fam_40_12_7  | 7                   | 17               | 0.539683 | GAAATTTTTTtt                                                                                                                                                   |
| Cele.WS201 | Cele.WS201_Fam_41_42_6  | 6                   | 42               | 0.682540 | CcgaAAAtTccAAAAACCGGcAATTGCCaAAATTTGCCgATTG                                                                                                                    |
| Cele.WS201 | Cele.WS201_Fam_42_27_6  | 6                   | 27               | 0.665021 | AAATcGccaaAATTTGaAAATTTCCGGC                                                                                                                                   |
| Cele.WS201 | Cele.WS201_Fam_43_20_6  | 6                   | 20               | 0.888889 | GGCAGACCTAGCCTACCCTA                                                                                                                                           |
| Cele.WS201 | Cele.WS201_Fam_44_184_5 | 5                   | 189              | 0.846208 | GAATACAGAACCCAaTTATGtCCGAGAAAAAGATCnAcTCAAGAAATnAACATAntCgAAtTgtCgGAtGTATAaAGATTTCCGAAGAcATTTCCAATTAcCCAATtGTTCAAtATTCTAAAtnAnAtTCTCTTACTaGAACaCTCTTGCCAAATG   |
| Cele.WS201 | Cele.WS201_Fam_45_95_5  | 5                   | 95               | 0.884912 | TACGCaGCGGAACGTATCATAAGT                                                                                                                                       |
| Cele.WS201 | Cele.WS201_Fam_46_22_5  | 5                   | 24               | 0.694444 | AGGGCCGcAGGCCcGAaACTTcTgGAAAcTgtGGCCcagCTTTAATCCTATTTCCAAGcAgATTGTTATTTCgCTCAAGCCTAccAACCAgTTTTG                                                               |
| Cele.WS201 | Cele.WS201_Fam_46_22_5  | 5                   | 24               | 0.694444 | agTACTGTAgggGTACTGTAgn                                                                                                                                         |

|                                                                                                                                                                  |                         |   |     |          |                                                                    |
|------------------------------------------------------------------------------------------------------------------------------------------------------------------|-------------------------|---|-----|----------|--------------------------------------------------------------------|
| Cele.WS201                                                                                                                                                       | Cele.WS201_Fam_47_19_5  | 5 | 22  | 0.578788 | TTTCTaGGCcATCgAtata                                                |
| Cele.WS201                                                                                                                                                       | Cele.WS201_Fam_48_20_5  | 5 | 21  | 0.638095 | GTAAATctACAtttgcttCC                                               |
| Cele.WS201                                                                                                                                                       | Cele.WS201_Fam_49_94_4  | 4 | 94  | 0.933806 |                                                                    |
| TCAAAATCTTCTgTTCTCTAAATATTGGGTgCTTTTCGATGcCtATgTAGACAAATCAATGGGAAAATcaTCAATTTCTGaAGGCAGTAAaTTC                                                                   |                         |   |     |          |                                                                    |
| Cele.WS201                                                                                                                                                       | Cele.WS201_Fam_50_40_4  | 4 | 41  | 0.796748 | TAntTTTTaAtgTgACCTACTtaAAAAGTAGGTCATGACC                           |
| Cele.WS201                                                                                                                                                       | Cele.WS201_Fam_51_27_4  | 4 | 27  | 0.720165 | AgaCTaCCTAgaCTACCTAgaCTaCct                                        |
| Cele.WS201                                                                                                                                                       | Cele.WS201_Fam_52_25_4  | 4 | 25  | 0.920000 | TATTTACTCtAATgTTCTGCCAATt                                          |
| Cele.WS201                                                                                                                                                       | Cele.WS201_Fam_53_20_4  | 4 | 24  | 0.479167 | tgnCCTAaAAAAATtgATaa                                               |
| Cele.WS201                                                                                                                                                       | Cele.WS201_Fam_54_22_4  | 4 | 24  | 0.539352 | CCACcntaagAAAgTTtCTAGG                                             |
| Cele.WS201                                                                                                                                                       | Cele.WS201_Fam_55_24_4  | 4 | 24  | 0.694444 | aaCCTAAGCCTAAGCctgagCcTA                                           |
| Cele.WS201                                                                                                                                                       | Cele.WS201_Fam_56_22_4  | 4 | 22  | 0.560606 | AAATcgcaAAATTTcnaAnAAA                                             |
| Cele.WS201                                                                                                                                                       | Cele.WS201_Fam_57_20_4  | 4 | 20  | 0.697222 | CTCAacCaAAAATcTcAGC                                                |
| Cele.WS201                                                                                                                                                       | Cele.WS201_Fam_58_18_4  | 4 | 18  | 0.629630 | CtAaGccTaaGCCgAaGc                                                 |
| Cele.WS201                                                                                                                                                       | Cele.WS201_Fam_59_16_4  | 4 | 16  | 0.729167 | TaAGGATCTaAggATC                                                   |
| Cele.WS201                                                                                                                                                       | Cele.WS201_Fam_60_16_4  | 4 | 16  | 0.805556 | AAATTTTCaGcAGCaA                                                   |
| Cele.WS201                                                                                                                                                       | Cele.WS201_Fam_61_14_4  | 4 | 14  | 0.730159 | aCGCTaTacGCTaT                                                     |
| Cele.WS201                                                                                                                                                       | Cele.WS201_Fam_62_12_4  | 4 | 12  | 0.814815 | CACGCAACGCga                                                       |
| Cele.WS201                                                                                                                                                       | Cele.WS201_Fam_63_11_4  | 4 | 11  | 0.898990 | TGGAGCGGtT                                                         |
| Cele.WS201                                                                                                                                                       | Cele.WS201_Fam_64_10_4  | 4 | 10  | 0.866667 | ATtcCAGAAA                                                         |
| Cele.WS201                                                                                                                                                       | Cele.WS201_Fam_65_174_3 | 3 | 183 | 0.826958 |                                                                    |
| TTAATCAGAAATATATTGAACCTTTGAAACATGTCTCAAcTtTaTTTTTTTTAGAttACGATGgCtCGTTTTTCAAGCTATGAATAACTTTCAAGTTTTTTGAAATAAactGGAACATTTTTTaaAATGaGtGTgTATATGtACaaACGCATgGCATTC  |                         |   |     |          |                                                                    |
| ATATACATATAGAT                                                                                                                                                   |                         |   |     |          |                                                                    |
| Cele.WS201                                                                                                                                                       | Cele.WS201_Fam_66_168_3 | 3 | 172 | 0.746770 |                                                                    |
| TTTTTTTTGTTTTTtTGtGCCtacaTATAcCTGtTgAAATGGAAATCaAgACAAAACCCcTnTAGCGCgtCTgAAAAtgaTaTcTaGGTcCAnAACTTaCCAAATATATTTtaAAAnAATCtAGAATCCAAATCTATcAAAAcATTTCCggAATT      |                         |   |     |          |                                                                    |
| CCAtAATt                                                                                                                                                         |                         |   |     |          |                                                                    |
| Cele.WS201                                                                                                                                                       | Cele.WS201_Fam_67_163_3 | 3 | 169 | 0.722551 |                                                                    |
| ATTTTTGACAtAtcTattCTCTCTTTTTTTTTaAcATgTAGTTCAGTGAcAactgacTCgAAAATATAATGcTcGTAATTATTTnaTAAgTgTgTgTGTCTCaGAGCCAngTCTGAAAAaACAGATTTTTTtTcGAAAATTTcAAAAantTcGTAgAAAT |                         |   |     |          |                                                                    |
| TcG                                                                                                                                                              |                         |   |     |          |                                                                    |
| Cele.WS201                                                                                                                                                       | Cele.WS201_Fam_68_79_3  | 3 | 79  | 0.909986 |                                                                    |
| gTGAATCTCCTcTCTaCCTaATGAGTcCTGACAGAATACCGGCAGTATTCTGGGGTCTCATTAGGTTtTaGTTTCTTcT                                                                                  |                         |   |     |          |                                                                    |
| Cele.WS201                                                                                                                                                       | Cele.WS201_Fam_69_76_3  | 3 | 76  | 0.918129 |                                                                    |
| AATGCTAGAgGACACTCcTTTGACCAAGGGgAAGTGGGAGAGACTGTGGaGTTGTCCGGTGTCTtTGTgCATGCTCg                                                                                    |                         |   |     |          |                                                                    |
| Cele.WS201                                                                                                                                                       | Cele.WS201_Fam_70_66_3  | 3 | 68  | 0.879085 | AATCAACCTATTcAGTTGACAATGGTTTTCTTTTAtCAAAtTTtTtAaAATTTtAAAGAAAACACA |
| Cele.WS201                                                                                                                                                       | Cele.WS201_Fam_71_64_3  | 3 | 64  | 0.986111 | GTAGTCAAAAAGaCAAAAGTGCGAATGTAGCTATTTTTTcAGTCAGTAGCGAAAAGACATTCA    |
| Cele.WS201                                                                                                                                                       | Cele.WS201_Fam_72_48_3  | 3 | 48  | 0.796296 | AATTTaAtTtTTGAtTTgCCCGTAATTTATattTTCTGAAGATgagc                    |
| Cele.WS201                                                                                                                                                       | Cele.WS201_Fam_73_42_3  | 3 | 46  | 0.603865 | TTGcCgAanTTGcCgAAcCTnAAAATTTtTcGGCAAaccGGCAA                       |
| Cele.WS201                                                                                                                                                       | Cele.WS201_Fam_74_33_3  | 3 | 33  | 0.734007 | CTgAAtATTTtCgACgAAAATTCaAATTTtTct                                  |
| Cele.WS201                                                                                                                                                       | Cele.WS201_Fam_75_32_3  | 3 | 33  | 0.626263 | cCAATTTTTAngCTaAaAaTcNcTtAAAAact                                   |
| Cele.WS201                                                                                                                                                       | Cele.WS201_Fam_76_31_3  | 3 | 32  | 0.812500 | AGAGATGAGTTGTCgAGCGAGacctCAGAAg                                    |
| Cele.WS201                                                                                                                                                       | Cele.WS201_Fam_77_28_3  | 3 | 31  | 0.573477 | aTcGATTTTAcntTGAAAATcGgAaAAT                                       |
| Cele.WS201                                                                                                                                                       | Cele.WS201_Fam_78_31_3  | 3 | 31  | 0.770609 | GGTTACTGTAACCTCAAtcctagGATtctTCG                                   |
| Cele.WS201                                                                                                                                                       | Cele.WS201_Fam_79_30_3  | 3 | 30  | 0.703704 | TTTCTAGAAAaatcTGgAAAcTTcTaGAat                                     |
| Cele.WS201                                                                                                                                                       | Cele.WS201_Fam_80_26_3  | 3 | 26  | 0.863248 | cAAAACCGCAATtGCCGaAAATTCc                                          |
| Cele.WS201                                                                                                                                                       | Cele.WS201_Fam_81_21_3  | 3 | 23  | 0.700483 | CTACAAACTACAAAATnaAaA                                              |
| Cele.WS201                                                                                                                                                       | Cele.WS201_Fam_82_18_3  | 3 | 22  | 0.616162 | GTCGATTTACGAGnTTTT                                                 |
| Cele.WS201                                                                                                                                                       | Cele.WS201_Fam_83_21_3  | 3 | 22  | 0.767677 | tGGCAaCTTTCTacCGAAAT                                               |
| Cele.WS201                                                                                                                                                       | Cele.WS201_Fam_84_21_3  | 3 | 21  | 0.751323 | AAcTTTTtGtAAAATtTGAt                                               |
| Cele.WS201                                                                                                                                                       | Cele.WS201_Fam_85_20_3  | 3 | 20  | 0.733333 | CGAtAtaGCTAtAAACgAtA                                               |
| Cele.WS201                                                                                                                                                       | Cele.WS201_Fam_86_17_3  | 3 | 18  | 0.660494 | AanTAGGTCaagTTAAA                                                  |
| Cele.WS201                                                                                                                                                       | Cele.WS201_Fam_87_16_3  | 3 | 16  | 0.722222 | TTcCAGGgTtcCAGGg                                                   |
| Cele.WS201                                                                                                                                                       | Cele.WS201_Fam_88_16_3  | 3 | 16  | 0.722222 | aATTcCGGcAAtCgGC                                                   |
| Cele.WS201                                                                                                                                                       | Cele.WS201_Fam_89_14_3  | 3 | 15  | 0.651852 | AATTTtTaAATTggA                                                    |
| Cele.WS201                                                                                                                                                       | Cele.WS201_Fam_90_11_3  | 3 | 11  | 0.717172 | AGGcAGGCaaT                                                        |
| Cele.WS201                                                                                                                                                       | Cele.WS201_Fam_91_226_2 | 2 | 226 | 0.660767 |                                                                    |
| AAATgTtCAtcTaCAGcccTaaCtTTTgTIGCGTATTTTATTATAAATGAAAACgACCATTATAaGcAAAATAGaTaaATTTacGaAacTTTGAAAaTcAcAAATCaCTTCAAaccAACTTTTTTtagAAAagTCTTTcAGAAACTTTGTaGcAAA     |                         |   |     |          |                                                                    |
| TTccAAGCTcTTTCaGAAGaTaccAaaAaATcCCAGTAGGTaCaAGAAGCTcCaaGcAGTTACAG                                                                                                |                         |   |     |          |                                                                    |

|            |                         |   |     |          |                                                                                                                                                                       |
|------------|-------------------------|---|-----|----------|-----------------------------------------------------------------------------------------------------------------------------------------------------------------------|
| Cele.WS201 | Cele.WS201_Fam_92_168_2 | 2 | 168 | 0.761905 | AATTcAaTTTTTTACATACATAgacTGCaCTTTTTGCAAAAaAAAAaTTTTGGAATTTTGGGAGAATTTTTATaAAAATGGATTGCTAATTTgTTTTTAGTATTATgGGTACGATTcgGgacCaaGaaATTCaATTTTcAGCCcCGCTAcAGGcGTTTgGTCTTc |
| Cele.WS201 | Cele.WS201_Fam_93_86_2  | 2 | 86  | 0.697674 | TGTATTTTGTAGTGTGttAGcCTCAACCAAAAttaattTaTTTTTaaTTcGTTGAGGCTaAgAAAAaTa                                                                                                 |
| Cele.WS201 | Cele.WS201_Fam_94_69_2  | 2 | 69  | 0.652174 | TTTCCGGCAAaccGGCaAATTgccgtaATTgAAAaTTcCaaCAAATCgCAAATTGCCGAATTGAAAA                                                                                                   |
| Cele.WS201 | Cele.WS201_Fam_95_69_2  | 2 | 69  | 0.683575 | AAAtTGGCaAATCGCAATTGcCaAAAATcAAaATTTTcCGGa                                                                                                                            |
| Cele.WS201 | Cele.WS201_Fam_96_44_2  | 2 | 44  | 0.681818 | CTGTTTTCTGAGCATTGTaGaaTTTCGGATTGATGGCCGAAAGG                                                                                                                          |
| Cele.WS201 | Cele.WS201_Fam_97_44_2  | 2 | 44  | 0.909091 | CGAGcTcGGCaaACaGCAAATTcGGCAAAaTCGGCAAATTGTC                                                                                                                           |
| Cele.WS201 | Cele.WS201_Fam_98_43_2  | 2 | 43  | 0.782946 | TCCCgTTTTCCCGTTTTTAAAATTTTCACGGGAACGGGAAT                                                                                                                             |
| Cele.WS201 | Cele.WS201_Fam_99_41_2  | 2 | 41  | 1.000000 | TTATGaAAAAGTGGCTCTAgaGCCACcAGAAATACCAGT                                                                                                                               |
| Cele.WS201 | Cele.WS201_Fam_100_39_2 | 2 | 39  | 0.863248 | GTAATTTATAATTTTTTAAAGATGAATAATAGATTGCC                                                                                                                                |
| Cele.WS201 | Cele.WS201_Fam_101_39_2 | 2 | 39  | 1.000000 | tTTTTaAAAAATTGATAAAAAATATAAAAAGCTGATT                                                                                                                                 |
| Cele.WS201 | Cele.WS201_Fam_102_37_2 | 2 | 37  | 0.914414 | TTTTTAGTGAAaaGCCAGTaTTTcagAAATTGGCAAa                                                                                                                                 |
| Cele.WS201 | Cele.WS201_Fam_103_37_2 | 2 | 37  | 0.747748 | GTAATAAGAAAATTTCaAACTTTTTTcACGaGtAT                                                                                                                                   |
| Cele.WS201 | Cele.WS201_Fam_104_35_2 | 2 | 35  | 0.809524 | CaAGTAGATTcTTTCCGCCGTTCCGATTTTcTCCa                                                                                                                                   |
| Cele.WS201 | Cele.WS201_Fam_105_35_2 | 2 | 35  | 0.809524 | AGCAGCCGACaCCTgcCGGTcGCcTaCAGtttt                                                                                                                                     |
| Cele.WS201 | Cele.WS201_Fam_106_33_2 | 2 | 33  | 0.601010 | CTACAGTAACCcaACAGTAccacTaaAGTATtt                                                                                                                                     |
| Cele.WS201 | Cele.WS201_Fam_107_33_2 | 2 | 33  | 0.626263 | aaCCAATCAGCaaTgAGCTCTgCCcATTTcTca                                                                                                                                     |
| Cele.WS201 | Cele.WS201_Fam_108_33_2 | 2 | 33  | 0.621212 | CGACCTGCGACCTAGCGACCTaGGTCGCaTTG                                                                                                                                      |
| Cele.WS201 | Cele.WS201_Fam_109_32_2 | 2 | 32  | 0.916667 | CGATTTTCTgGaaaAAAAACTAAAAATTC                                                                                                                                         |
| Cele.WS201 | Cele.WS201_Fam_110_31_2 | 2 | 31  | 0.806452 | aaGGATTTCCCACTATGTCAATACATTGT                                                                                                                                         |
| Cele.WS201 | Cele.WS201_Fam_111_29_2 | 2 | 29  | 0.908046 | CAAgaTGCCGAaTTacCCGAGaTcGGA                                                                                                                                           |
| Cele.WS201 | Cele.WS201_Fam_112_28_2 | 2 | 28  | 0.601190 | CACTGaCCAAAGAAAAAcAaaACACGTG                                                                                                                                          |
| Cele.WS201 | Cele.WS201_Fam_113_28_2 | 2 | 28  | 0.785714 | CCTaCagTGCTaCCgTGCCTACCgTA                                                                                                                                            |
| Cele.WS201 | Cele.WS201_Fam_114_27_2 | 2 | 27  | 0.703704 | TCCTGGGcTcCTGaTGGTCCcggTGG                                                                                                                                            |
| Cele.WS201 | Cele.WS201_Fam_115_27_2 | 2 | 27  | 0.703704 | TGAAATTcCACAAAaTATcGATTTTc                                                                                                                                            |
| Cele.WS201 | Cele.WS201_Fam_116_26_2 | 2 | 26  | 0.794872 | TTgaAaTTTTTCAcGAAAAAa                                                                                                                                                 |
| Cele.WS201 | Cele.WS201_Fam_117_24_2 | 2 | 24  | 0.625000 | TcaaCGGATTTTaGGcTTAAAA                                                                                                                                                |
| Cele.WS201 | Cele.WS201_Fam_118_23_2 | 2 | 23  | 0.652174 | CCgGCGTGGTaTTCaAcGCCTTc                                                                                                                                               |
| Cele.WS201 | Cele.WS201_Fam_119_23_2 | 2 | 23  | 0.710145 | GGTGGCCgAaTTTTTaaAGaTC                                                                                                                                                |
| Cele.WS201 | Cele.WS201_Fam_120_23_2 | 2 | 23  | 0.681159 | AGGCATGAGGaAGGCgcaTaaC                                                                                                                                                |
| Cele.WS201 | Cele.WS201_Fam_121_23_2 | 2 | 23  | 0.652174 | GTACTGTAGCaaaTCAAGaTaGa                                                                                                                                               |
| Cele.WS201 | Cele.WS201_Fam_122_23_2 | 2 | 23  | 0.652174 | TGGcTGAGGCTCTcTagATTTt                                                                                                                                                |
| Cele.WS201 | Cele.WS201_Fam_123_22_2 | 2 | 22  | 0.734848 | AATTTTTGaTCAAAAgCGGACT                                                                                                                                                |
| Cele.WS201 | Cele.WS201_Fam_124_22_2 | 2 | 22  | 0.795455 | AcAAACTACATTatGcAgACT                                                                                                                                                 |
| Cele.WS201 | Cele.WS201_Fam_125_21_2 | 2 | 21  | 0.650794 | cAAAAATCgACTaAAAAaGT                                                                                                                                                  |
| Cele.WS201 | Cele.WS201_Fam_126_21_2 | 2 | 21  | 0.650794 | TGGCTaAAAaTaGaGAATTTt                                                                                                                                                 |
| Cele.WS201 | Cele.WS201_Fam_127_21_2 | 2 | 21  | 0.690476 | TATCGATTTTTcCaaCagaTTt                                                                                                                                                |
| Cele.WS201 | Cele.WS201_Fam_128_21_2 | 2 | 21  | 0.690476 | AGCAGCCGACACCTCAaaGGT                                                                                                                                                 |
| Cele.WS201 | Cele.WS201_Fam_129_21_2 | 2 | 21  | 0.873016 | TTTCCTAGTTGATaGCCGAGg                                                                                                                                                 |
| Cele.WS201 | Cele.WS201_Fam_130_21_2 | 2 | 21  | 0.873016 | AAAaTTGGCTTAAATGgTca                                                                                                                                                  |
| Cele.WS201 | Cele.WS201_Fam_131_21_2 | 2 | 21  | 0.746032 | CAACTACCACAACCTACCGTAC                                                                                                                                                |
| Cele.WS201 | Cele.WS201_Fam_132_21_2 | 2 | 21  | 1.000000 | TTcTaAATTTTaAaGCATaT                                                                                                                                                  |
| Cele.WS201 | Cele.WS201_Fam_133_20_2 | 2 | 20  | 0.633333 | GGCCTaGAATcTcaCaCaT                                                                                                                                                   |
| Cele.WS201 | Cele.WS201_Fam_134_20_2 | 2 | 20  | 0.666667 | CCAATTggGGTacaTAGG                                                                                                                                                    |
| Cele.WS201 | Cele.WS201_Fam_135_19_2 | 2 | 19  | 0.614035 | AATTTaCCAATTgACCAAA                                                                                                                                                   |
| Cele.WS201 | Cele.WS201_Fam_136_19_2 | 2 | 19  | 0.798246 | TaAaCCTAAGCTggAGCT                                                                                                                                                    |
| Cele.WS201 | Cele.WS201_Fam_137_18_2 | 2 | 18  | 0.666667 | aAaTTGCCGGAATTaCga                                                                                                                                                    |
| Cele.WS201 | Cele.WS201_Fam_138_18_2 | 2 | 18  | 0.629630 | TAaGCaTATAaGCTTA                                                                                                                                                      |
| Cele.WS201 | Cele.WS201_Fam_139_16_2 | 2 | 16  | 0.750000 | cAaAAaTGAAAATCt                                                                                                                                                       |
| Cele.WS201 | Cele.WS201_Fam_140_15_2 | 2 | 15  | 0.655556 | GGGgCaACAAaAAaA                                                                                                                                                       |
| Cele.WS201 | Cele.WS201_Fam_141_15_2 | 2 | 15  | 0.733333 | AaAcGCTATGGc                                                                                                                                                          |
| Cele.WS201 | Cele.WS201_Fam_142_13_2 | 2 | 13  | 0.641026 | ATTcTGGAATAT                                                                                                                                                          |
| Cele.WS201 | Cele.WS201_Fam_143_12_2 | 2 | 12  | 0.833333 | TAGCTcAGcTTt                                                                                                                                                          |
| Cele.WS201 | Cele.WS201_Fam_144_12_2 | 2 | 12  | 0.680556 | GTcGAAAATG                                                                                                                                                            |
| Cele.WS201 | Cele.WS201_Fam_145_11_2 | 2 | 11  | 0.696970 |                                                                                                                                                                       |

|                                                                                                                                                                                                               |                          |   |     |          |             |
|---------------------------------------------------------------------------------------------------------------------------------------------------------------------------------------------------------------|--------------------------|---|-----|----------|-------------|
| Cele.WS201                                                                                                                                                                                                    | Cele.WS201_Fam_146_11_2  | 2 | 11  | 0.757576 | CAGTTaTCACc |
| Cele.WS201                                                                                                                                                                                                    | Cele.WS201_Fam_147_11_2  | 2 | 11  | 0.757576 | TGACAACTTca |
| Cele.WS201                                                                                                                                                                                                    | Cele.WS201_Fam_148_200_1 | 1 | 200 | 0.000000 |             |
| TGTTGGTCCAGAAGGTATGACTGAAAAATTCACATTTTTCTGCTTGAACCTGGCAGATTTAAAAATTTTCAAATGCTGTTTTCAAATTTCTGAAAGAACTTAAAAATTTGCTACAAAATGGCTACGGGAATTTCTAAAAAAGTTAGTTTTCAAGCCAGAAATTAATTTTCAAATTTGGAAAAATCTATTAATTTTGTATATAAAT |                          |   |     |          |             |
| Cele.WS201                                                                                                                                                                                                    | Cele.WS201_Fam_149_185_1 | 1 | 185 | 0.000000 |             |
| CTGTAGTTTTTTGTGCGCATTAAATGCAAATTAACCTTCATCTATAGAAAAATGTAGAGCATCTTTTTAAAAATAAAAAATGAATTCAAAATCTTAAAAATGAGCAAAGTTATGAAAGTTTGAAAATTTGAAATTTTCAACAAAAATTTTTTTTTGGAAATTTGGGTCTCGAAAGGTGCCGGGTA                     |                          |   |     |          |             |
| Cele.WS201                                                                                                                                                                                                    | Cele.WS201_Fam_150_181_1 | 1 | 181 | 0.000000 |             |
| TTTTTAACTTTTTAAATCCACTAAAACCTGGAATGGTACAGAACATGCAAAATGTAATTTTAAAGAACTGAATGTGGTTTTCGAATATTCATGGATTGCTTTATTCGAACACTGACTCTGAAATATTTTGCATCCATTTGACTATTAATGTTCATATTATACC GAACACTACTAATTTACTGG                      |                          |   |     |          |             |
| Cele.WS201                                                                                                                                                                                                    | Cele.WS201_Fam_151_180_1 | 1 | 180 | 0.000000 |             |
| CAAATATCTCTAGTTTTTAAAAACAGTTCAAATTTTGGGTTACCTCTTATTACTTTACAGTGATTGTTACATTGTAGACTCTGTGGACTGTCCAAGTCTACGACGGCATGAGTTTAGTAAAAAGGTTGTACCATGAACTGAATCAAATTTGGAAAA TTTGGAAAAATCTGCGAGAAT                            |                          |   |     |          |             |
| Cele.WS201                                                                                                                                                                                                    | Cele.WS201_Fam_152_178_1 | 1 | 178 | 0.000000 |             |
| ATTTCCGAATTTAGTTTGAGAATAAAAAGAAATCCATTAGTATTTGAAATAACGTTTCAGTTCTCGAAATTTAGATCAGAATAGTTTTATAAAATCCCGAGTTTTGTGGTCTTACGAGTTAAAAAACAATCGTAGTTTTATTGCTATAAATGACAATTAACA ATTAATGGATACAACAC                          |                          |   |     |          |             |
| Cele.WS201                                                                                                                                                                                                    | Cele.WS201_Fam_153_172_1 | 1 | 172 | 0.000000 |             |
| CAAACATAGGCAACCAAAAAATATTTTCCAAGTTTTTATGATTTGTTGCACATGAAAAAACTTTTTTCCGGGTTTTTAAAAATGAATATCATAGCTACAGAAACGGTTGTACACTTTTCTGAAAATACAAAAATTTGCAATTTTTATAGCTAGGAGAC TTTTTGAATGCC                                   |                          |   |     |          |             |
| Cele.WS201                                                                                                                                                                                                    | Cele.WS201_Fam_154_161_1 | 1 | 161 | 0.000000 |             |
| GCGTCGCGCTAAATCTCAAATTTGCCTTAATATGTTTCAGAAAGTACCACAACATATGTTTTTGAATCTTCAAAAATTTCCCTTAATTTAAGCCCCATATTAACCTAGTTTGGATAAAAACTAACGAATTTCTAAATTTTCGGCGGTTGCGTGT C                                                  |                          |   |     |          |             |
| Cele.WS201                                                                                                                                                                                                    | Cele.WS201_Fam_155_156_1 | 1 | 156 | 0.000000 |             |
| CGAAAAATTCAGTCATTTCTAATTTTTTTTGTGCAAAAATAAAAAAATAATTAATAATTTATGAGCGTTCTATAATTTTTTAACATTTATATTTCGGACATTGCGACCCACATTTGATAATTTGAAGCAAAAACTAAAGGACTCTACTTCAAAA                                                    |                          |   |     |          |             |
| Cele.WS201                                                                                                                                                                                                    | Cele.WS201_Fam_156_155_1 | 1 | 155 | 0.000000 |             |
| TCCCGCTGTGGTCAAAGTTTTTTGTGTGCTCAGTTCTGTACGACAAATGTGTTAAAAATCTTCTGAAAACCTCAAATTTCCAAGTTTTCCCAAAAAATGGGTCAAATGGTACAGTGGGATTTTCCACGAATTTAAGTAGATGGTCGTGAGTTCAAC                                                  |                          |   |     |          |             |
| Cele.WS201                                                                                                                                                                                                    | Cele.WS201_Fam_157_151_1 | 1 | 151 | 0.000000 |             |
| ATTTCCAGGCTGGAATGGCCGTTTTGGGCCGTTGTAGGCCGAATCTTCAATGTTTTCTGAATACGCTGCATTAACATTTATAAGCAAAAATGAGCGTAGAATGTCGTTAATTAGAACCCCCAATTTGGCTAAATTTCTGAAAAAGTTAC                                                         |                          |   |     |          |             |
| Cele.WS201                                                                                                                                                                                                    | Cele.WS201_Fam_158_145_1 | 1 | 145 | 0.000000 |             |
| GTGGCCTAGAAAACCTGAGCATGATTTTTCTAGGCCACCACTTCTAACATTCATAACTTGGCGGAAAATCTACATAATAAAAAATTTGCAAAAACCAATTTATTTGTCTAAAAAATGCAATAAATTTGACCTACTTGATTTTGA                                                              |                          |   |     |          |             |
| Cele.WS201                                                                                                                                                                                                    | Cele.WS201_Fam_159_124_1 | 1 | 124 | 0.000000 |             |
| AATTTTCAAAGTTTGGAAAAATCTATTAATTTTGCATATAAATTTTATAAATTTCTGAAAGAACAATAAATTTTCTACAAAATTTTCTAAAAAATTTAGTTTGAAGACAGAATTT                                                                                           |                          |   |     |          |             |
| Cele.WS201                                                                                                                                                                                                    | Cele.WS201_Fam_160_121_1 | 1 | 121 | 0.000000 |             |
| AAAAGATAGTTGCTCTTTGAGCAGAAGGTTGCAAAACCGCAAGAGCAAACCTGCCAAATGACAAAGCCACCAAGTACTCGTTGCACCTACCTATCATAAGCTCGTAGACTATAATTTCTCTG                                                                                    |                          |   |     |          |             |
| Cele.WS201                                                                                                                                                                                                    | Cele.WS201_Fam_161_119_1 | 1 | 119 | 0.000000 |             |
| ACTCCAATACCAACCGATGCTAAAAGATTCTGATCCCAATTTCTGAAAATAACAGTTTCGGCTTGATGTACCAATGAGAGACACAGTGTAAACAAGTTTTTCATAGTTCTGACGGCG                                                                                         |                          |   |     |          |             |
| Cele.WS201                                                                                                                                                                                                    | Cele.WS201_Fam_162_119_1 | 1 | 119 | 0.000000 |             |
| GTTGCATATTTTGCATAAATTTTACGGGAACGTAATCTCCACATCACCAGCTTTCAATTTAAGTACCACACGGCAAGGTTTAAATTTTTGAAATTTGGTCGCGGATTTTCTCGGCCACC                                                                                       |                          |   |     |          |             |
| Cele.WS201                                                                                                                                                                                                    | Cele.WS201_Fam_163_117_1 | 1 | 117 | 0.000000 |             |
| TGTGGTTTCGACAGTAGGTGCATTAGCCTCTGGAACCTGGAACATCCTTTTGGCTCGACGATTGCAGCTTGTGTACTTCAGATGTTTCTTTGATTCCACAGGTGCAAGTTTCTCAAC                                                                                         |                          |   |     |          |             |
| Cele.WS201                                                                                                                                                                                                    | Cele.WS201_Fam_164_114_1 | 1 | 114 | 0.000000 |             |
| GTGTTTCAGAATTACATGGAGTCTACTACTTGCAGAAATTTGTGGCTGTAGACGATTGACCTGCTGTAGTTGAATCGCTTGAACCTGTCATAGTGATGTTCCATCAGACGTTT                                                                                             |                          |   |     |          |             |
| Cele.WS201                                                                                                                                                                                                    | Cele.WS201_Fam_165_111_1 | 1 | 111 | 0.000000 |             |
| CTGTTGTGACTACTTAGCGTAGCTAGATTCTAAAAATTCAGTCTTAAATTTTTATTAATTTTTAAAAAATTTTATTTACCAGTAGTCGATACTGCAGGCGTCGTTA                                                                                                    |                          |   |     |          |             |
| Cele.WS201                                                                                                                                                                                                    | Cele.WS201_Fam_166_108_1 | 1 | 108 | 0.000000 |             |
| TTTCAGATTTTTCAGATTTTCACTTGATTATATAGGTCACGACCCAAGTTATTTTGAATTTGAGCTACACGGCTGTAACCTTTGGAGCTATGGGTAATCAAGTATGAGC                                                                                                 |                          |   |     |          |             |
| Cele.WS201                                                                                                                                                                                                    | Cele.WS201_Fam_167_108_1 | 1 | 108 | 0.000000 |             |
| AAGTCTTCTTGGTTCTGTGCTTTGCTTCGAAATGTTGACCATCTCCTTGCAGGATCTTATTTGTCAGATGGAACCTTCTTGGCATACTCTCTCCACTGATGTGAGTG                                                                                                   |                          |   |     |          |             |
| Cele.WS201                                                                                                                                                                                                    | Cele.WS201_Fam_168_102_1 | 1 | 102 | 0.000000 |             |
| TTCTCCACCAACTGGAACCCGAAGAGCCTGGATCTTTCAGTTGAGACTACACCATATACCGGTGAGACTCCAGTAACTTTGGGACCTCCAGGATCAACAGC                                                                                                         |                          |   |     |          |             |
| Cele.WS201                                                                                                                                                                                                    | Cele.WS201_Fam_169_102_1 | 1 | 102 | 0.000000 |             |
| TTGCTGCAGCATATCTTTCTCCAGTACCACCTTGATATGTCGAACGATGATAGTTTGAAGATCAAGAGAATCAGTTGGACGATCAATTTCCATCTTTGGGTC                                                                                                        |                          |   |     |          |             |
| Cele.WS201                                                                                                                                                                                                    | Cele.WS201_Fam_170_102_1 | 1 | 102 | 0.000000 |             |
| TGTACACTTCTCCAAAATGACTGTAAGAATGGACTCCTTATATGATTTTTAAACCCGACTCTGGACATACAACTTCTCTCAAAAAGAAAATAGACTTCACA                                                                                                         |                          |   |     |          |             |
| Cele.WS201                                                                                                                                                                                                    | Cele.WS201_Fam_171_101_1 | 1 | 101 | 0.000000 |             |
| GGTTACTGTAGTTCCAAAAGTACGCAAAACCTGACTACGGTTCCCTAATACATCAGATATTACGACAAAAGTGCAGAAAATCGCTAAAAATGACTTTACTGG                                                                                                        |                          |   |     |          |             |

Cele.WS201 Cele.WS201\_Fam\_172\_96\_1 1 96 0.000000  
GTTGATTTGCGGCACTCTACAGATAGTGGATCTGCTTCTTACCAATCTTCCCGTTACCGCCACGCACTAAAGCTCCAAACTATTTTATTTTTTTGG  
Cele.WS201 Cele.WS201\_Fam\_173\_93\_1 1 93 0.000000  
GGCTTTGGAGTTGCTTTAGCTGATGTTGGCTTGGCAACTGGTTTCTTCTCGTCATCGCTTGAATCCGAAGAGGACTCGGCCTTCTTGGCAACA  
Cele.WS201 Cele.WS201\_Fam\_174\_91\_1 1 91 0.000000  
AATTTTTGAAATTAATTTCTGAAAGCGGTTAAAGTTTGAACAATAATCCCCGAAAGAACTTTTTCAAAAAAGTTAATTTCAAGTCAGATATT  
Cele.WS201 Cele.WS201\_Fam\_175\_89\_1 1 89 0.000000  
AGTATTTTGGGGTCTCTCCCTAGTTGTAGGTTAACTTTATACCTTTTCTTCTTCTTCTTCTCGAGATGATCGGTCCAGAATACAGCC  
Cele.WS201 Cele.WS201\_Fam\_176\_85\_1 1 85 0.000000  
ATTTTGAAAATTAATTTCTGCGCTTGAACCTAACTTTTCTGAAATTTCCCGTAGCCATTTTGTAGCAAATTTCAAGTTCTTTTAGA  
Cele.WS201 Cele.WS201\_Fam\_177\_84\_1 1 84 0.000000  
TAAAAAGTGGTCTAATTTTGTGAAGACGGTAATTCATATATGAGAAATCTAGGTTTAAACCCATCAAAAACTAT  
Cele.WS201 Cele.WS201\_Fam\_178\_81\_1 1 81 0.000000  
TTATTTTTCGATTTTAGCGAAAATCAACACATTTTCGATCATTTTTGAACAAAAAATTTGTTTTCTCAAAAAATTTGACGC  
Cele.WS201 Cele.WS201\_Fam\_179\_80\_1 1 80 0.000000  
ACCGTAACCCCTTAGACAATCGAAAATCAAAATTTTCCGCAATTTTTCGTAAAATTCGGGTGTAGCGGACTTCTGGAGCT  
Cele.WS201 Cele.WS201\_Fam\_180\_80\_1 1 80 0.000000  
AATTTCTCAATAGCGCGCGCTTGCACATCCGAACGGCGCAAAATTTGAATTTTGGCCATAAAAATACGAAAATCGGCA  
Cele.WS201 Cele.WS201\_Fam\_181\_79\_1 1 79 0.000000  
ATTTTTTTTAAATTGATAAAAATATAAAAAGCTGAATTTTTCAAAAATTCAAAAGTATGGGAAAATCATATGGAGTC  
Cele.WS201 Cele.WS201\_Fam\_182\_78\_1 1 78 0.000000  
CGAAGTTGCTGGATCAACGATCACACAGGCGGATTTGTCTGCACAACCGGATCAGAAGTCGTCGTACTTGGATCTTT  
Cele.WS201 Cele.WS201\_Fam\_183\_78\_1 1 78 0.000000  
TGCAAGGCTCCGATGATGATACCACTTCTAAAGTCTGAGGTGTACAATTTTCGGGTGTCGTAGAACTTGGATCAGTAC  
Cele.WS201 Cele.WS201\_Fam\_184\_73\_1 1 73 0.000000  
Cele.WS201 Cele.WS201\_Fam\_185\_72\_1 1 72 0.000000  
Cele.WS201 Cele.WS201\_Fam\_186\_70\_1 1 70 0.000000  
Cele.WS201 Cele.WS201\_Fam\_187\_69\_1 1 69 0.000000  
Cele.WS201 Cele.WS201\_Fam\_188\_69\_1 1 69 0.000000  
Cele.WS201 Cele.WS201\_Fam\_189\_68\_1 1 68 0.000000  
Cele.WS201 Cele.WS201\_Fam\_190\_67\_1 1 67 0.000000  
Cele.WS201 Cele.WS201\_Fam\_191\_65\_1 1 65 0.000000  
Cele.WS201 Cele.WS201\_Fam\_192\_64\_1 1 64 0.000000  
Cele.WS201 Cele.WS201\_Fam\_193\_62\_1 1 62 0.000000  
Cele.WS201 Cele.WS201\_Fam\_194\_62\_1 1 62 0.000000  
Cele.WS201 Cele.WS201\_Fam\_195\_60\_1 1 60 0.000000  
Cele.WS201 Cele.WS201\_Fam\_196\_60\_1 1 60 0.000000  
Cele.WS201 Cele.WS201\_Fam\_197\_60\_1 1 60 0.000000  
Cele.WS201 Cele.WS201\_Fam\_198\_57\_1 1 57 0.000000  
Cele.WS201 Cele.WS201\_Fam\_199\_57\_1 1 57 0.000000  
Cele.WS201 Cele.WS201\_Fam\_200\_56\_1 1 56 0.000000  
Cele.WS201 Cele.WS201\_Fam\_201\_52\_1 1 52 0.000000  
Cele.WS201 Cele.WS201\_Fam\_202\_52\_1 1 52 0.000000  
Cele.WS201 Cele.WS201\_Fam\_203\_51\_1 1 51 0.000000  
Cele.WS201 Cele.WS201\_Fam\_204\_50\_1 1 50 0.000000  
Cele.WS201 Cele.WS201\_Fam\_205\_50\_1 1 50 0.000000  
Cele.WS201 Cele.WS201\_Fam\_206\_49\_1 1 49 0.000000  
Cele.WS201 Cele.WS201\_Fam\_207\_49\_1 1 49 0.000000  
Cele.WS201 Cele.WS201\_Fam\_208\_48\_1 1 48 0.000000  
Cele.WS201 Cele.WS201\_Fam\_209\_45\_1 1 45 0.000000  
Cele.WS201 Cele.WS201\_Fam\_210\_45\_1 1 45 0.000000  
Cele.WS201 Cele.WS201\_Fam\_211\_45\_1 1 45 0.000000  
Cele.WS201 Cele.WS201\_Fam\_212\_43\_1 1 43 0.000000  
Cele.WS201 Cele.WS201\_Fam\_213\_43\_1 1 43 0.000000  
Cele.WS201 Cele.WS201\_Fam\_214\_42\_1 1 42 0.000000  
Cele.WS201 Cele.WS201\_Fam\_215\_42\_1 1 42 0.000000  
Cele.WS201 Cele.WS201\_Fam\_216\_42\_1 1 42 0.000000

ACTTTGTAGTTGTAGTCTAGCAGACCAAAATTTATTA AAAAAGTGCAGAAAATTTGATGGGTCTGCTAATTAAG  
TCCATCCAGCTGTGGTTGGTCTCTGGGTGAATCCCTCGAGAAGTATCACGAGTAGTACCATTGGCTCCGTTG  
AAAAATCGATGTTTTGAAGTTTTTCTCAATGAGCGCACTTTCAACAGCGGAGAAATTTGAATTTCCACC  
CCGGAATTTCTATATTCGGCAAATACCCGTTTACATAAAATTTCTTTTCTGCAAAATTTGTTGGTTG  
TTGCCGATTTGCCCGAAATTTACATTTCCGGCAAAGTCCGTTTTTCCCGGCAAAACGGCAATTTGCGAGG  
TTCTAGGCCACCATTCTCCTCCTCGTGACTGTGGGAGTATCTAACCCCAACAACAACCTTTTGGTTT  
CCATCCAAATCCAAATCGTTGGTGCATCATCTCCAGTCCCGAATCGCCATCTCCAGCAGCTCCCGAA  
TTTTTTGAATTTCTGTTTTCAAATTTCTGAAAGAACAATAAAATTTGCTACAAAATGGCTACGGGAA  
ATATACCAATGAGAGAGCACAGTGAACCTAGTTTTCATAGTTCTCACGGCGACTCCAATCACT  
ATTTTCCATCAAAAATCGGCTGTAAAACCGATTTTTAACTGAAAAATCACAATTTCTAC  
GTAAAAATGTTTGAATTTGAAATTTTCAACATGAAAATGCCTGAAATTTTGAATTTCTAT  
AGAAAATTCGACTTTTTCGGACAATTTGAAATTTTTACTAAAAAATTTGGATATTTTTGA  
ATTAGTTGAGCTTATGTCTCGGTTGAAGACACAATTTGGATGGTGGCTTGAGGAGCTGG  
CTGCTGATTTCCGAGAAGAAGGCCCAACCAAGAGAGAAGCTGATCCACCAAGACTGAAT  
GAATCAACAAGCTGATCAAGAGCAACACCGTGGATCCCGATCTGCCGGACAGAAGG  
AAATTTCTAAGACTGTACCATTCTCTCCATTTCAAAACCTCATGTCAAATCTCAATC  
GAAATTAATAATTTGTGTTTTTGGCATTTTTCTAGGCCATTTGGATTAGGTGGCCCTAG  
AAAAATCGATAATTTTCTGTGATTTTACTCTAAAAATTCGGATTTTTTCGCTT  
TCCGACACATCGGAACTTGGCGGCGACAGAAAAATTTGTGTCGGCGGTGAAT  
CAATTCGGCAGACCGGCAATTTGCCGAAATTTGAAAAATTTCCCGGAAATTCGG  
TGGCCTAGAACCCTGTTTTCTGTAGCCTAGACTATCATCTAGAAATCAA  
GGCGTGTTTTACATGCCCCGCCCAAAAATTTGATGTTTCCACCAAAAAT  
AAAATCAATAATTTTAAATTAGATATCAATTTTTCTAAATTTTTCCGA  
GCTACGATATCGTAGCACTTTTTTATTTTTCCATATTTCCACCAGAAAAAT  
TGCCCTACGTGCCTACATAAGAAGCGTAGGTAGCTTCAAAGGTGTTGCG  
ACCATCAGGCGGACCACCAGGACCAATTTGATCCATCAGGAGCACC  
ACAATGAATCAACTGCAGCACCAGCACATCTACAGAGACACT  
CCACCAGCAGACTTCGAGTACGACAGAGAGCACTTCGACTCCAT  
AGCAGCCGACAATTTGCCGTTGCCTTAAAATTTGAAGTAAATCC  
GCACAATTTTCAAGATTTTTTGGTGAATAATTTGGTCATTTTT  
GGACCAATGGACCAATGGGCCATCAGATCCGAATAAGCCA  
CCTAGAATTTTTGGCATGTTGGCTTGTATTTTAAACAAGACGG  
CGGCAATTCGGCAGTTGCCAAATTTGCCGTTTTTAAAATATC

|            |                         |   |    |          |                                             |
|------------|-------------------------|---|----|----------|---------------------------------------------|
| Cele.WS201 | Cele.WS201_Fam_217_42_1 | 1 | 42 | 0.000000 | AGGTGCTGCTTCTTCGGAAACATTTTCTTGTAGTTGGCTCCGA |
| Cele.WS201 | Cele.WS201_Fam_218_40_1 | 1 | 40 | 0.000000 | AATTGATTTGTTTACTGAAATAAATGTTTTTTTGAAA       |
| Cele.WS201 | Cele.WS201_Fam_219_40_1 | 1 | 40 | 0.000000 | GGAATTTTTGATTTTCCGGCTATGAAAACCGAAACAATC     |
| Cele.WS201 | Cele.WS201_Fam_220_40_1 | 1 | 40 | 0.000000 | AAAAATCCACGTAGATATATCGATTTTTCATAGAAATTTGCA  |
| Cele.WS201 | Cele.WS201_Fam_221_40_1 | 1 | 40 | 0.000000 | CCAATTTTTTGGCCAAAAAATCAAAAATCTGAATTTTGG     |
| Cele.WS201 | Cele.WS201_Fam_222_40_1 | 1 | 40 | 0.000000 | AATGGGCGCCGGTTTCGCTTTGAGCGATTCTTACCCTTA     |
| Cele.WS201 | Cele.WS201_Fam_223_39_1 | 1 | 39 | 0.000000 | GAGAGACCACCACCGCAGCTGCCACCGAAGCCTCGTCG      |
| Cele.WS201 | Cele.WS201_Fam_224_39_1 | 1 | 39 | 0.000000 | TTTAGTCCCAGTGATATATCTGACACACTTAGGCCCCCG     |
| Cele.WS201 | Cele.WS201_Fam_225_39_1 | 1 | 39 | 0.000000 | GTAGTCGGAGTAGTCGGAGTAGTTGGAGTAGACTTCATG     |
| Cele.WS201 | Cele.WS201_Fam_226_39_1 | 1 | 39 | 0.000000 | TGGTACGGTAGTTGTAGTGGTAGTGGAGGTTGTTGTAGG     |
| Cele.WS201 | Cele.WS201_Fam_227_39_1 | 1 | 39 | 0.000000 | ATTGATACTTTGTCCGGTTTAGATCATCGGCCGAGCTTC     |
| Cele.WS201 | Cele.WS201_Fam_228_38_1 | 1 | 38 | 0.000000 | TAGGCCATCAGTGAAAACCTATGTGCTCGGTGAAAAGT      |
| Cele.WS201 | Cele.WS201_Fam_229_37_1 | 1 | 37 | 0.000000 | CAAATTGGCAAATTTGGCAAAAAATGTTAAATCTCGC       |
| Cele.WS201 | Cele.WS201_Fam_230_36_1 | 1 | 36 | 0.000000 | GCAGGAAATTTAAAAAATGTTGAACAACATTTTTTG        |
| Cele.WS201 | Cele.WS201_Fam_231_36_1 | 1 | 36 | 0.000000 | GATATTTTCATGTTCCGGCAAAAGTACCGATTTGCCA       |
| Cele.WS201 | Cele.WS201_Fam_232_36_1 | 1 | 36 | 0.000000 | CCTTTGTACCCCTTTGATCCAGGAGTTCATCGGCC         |
| Cele.WS201 | Cele.WS201_Fam_233_36_1 | 1 | 36 | 0.000000 | TCCTGGTGGTCTGGTGGTCCAGCTTGTCCATCGAC         |
| Cele.WS201 | Cele.WS201_Fam_234_35_1 | 1 | 35 | 0.000000 | TTTGCCGGAAATGTTGAACCTGAAAATTTTCGGG          |
| Cele.WS201 | Cele.WS201_Fam_235_35_1 | 1 | 35 | 0.000000 | CGGCAAATTTGCCGATTTTCCGAATTTCCCGGAAAT        |
| Cele.WS201 | Cele.WS201_Fam_236_35_1 | 1 | 35 | 0.000000 | GCCGGCGGCTGCAGACATGTTAGCGACGTGTGC           |
| Cele.WS201 | Cele.WS201_Fam_237_34_1 | 1 | 34 | 0.000000 | CTAAGCCTAAATAGCGAACGCTCGCCACTGACGC          |
| Cele.WS201 | Cele.WS201_Fam_238_34_1 | 1 | 34 | 0.000000 | GAAAATTCAACTGTTTTGGGGAAATTTTAAACCGG         |
| Cele.WS201 | Cele.WS201_Fam_239_34_1 | 1 | 34 | 0.000000 | CGGCAAATTTCCCAAGCTCGGCAAAACCACCAATT         |
| Cele.WS201 | Cele.WS201_Fam_240_34_1 | 1 | 34 | 0.000000 | AAGTATTTTTTCCGGTTTTTTTGGCGAAATTTCC          |
| Cele.WS201 | Cele.WS201_Fam_241_33_1 | 1 | 33 | 0.000000 | TTTTAAAAATTCGGCAAAGTTAGCAAATTTGCCGG         |
| Cele.WS201 | Cele.WS201_Fam_242_33_1 | 1 | 33 | 0.000000 | ATCCTCCTTGGGATCCTCCAGCATAATCCACCGG          |
| Cele.WS201 | Cele.WS201_Fam_243_33_1 | 1 | 33 | 0.000000 | CTAAGGACAAAATGGGAGACGCTGGGACACCA            |
| Cele.WS201 | Cele.WS201_Fam_244_32_1 | 1 | 32 | 0.000000 | CAGAAGCTGTCGAAAACCTCAAATTTCTCGA             |
| Cele.WS201 | Cele.WS201_Fam_245_32_1 | 1 | 32 | 0.000000 | AACTCGGCCACCAATATTCTCAAACCTTAAGAA           |
| Cele.WS201 | Cele.WS201_Fam_246_32_1 | 1 | 32 | 0.000000 | GCACCAAATATACCAATTTAGCACCAGATAGA            |
| Cele.WS201 | Cele.WS201_Fam_247_32_1 | 1 | 32 | 0.000000 | CCAACAGTACCCCTTAGGACCCCTTAGGACC             |
| Cele.WS201 | Cele.WS201_Fam_248_32_1 | 1 | 32 | 0.000000 | GGCACCGCCACCTCTCGCATTTTTCGAGAATA            |
| Cele.WS201 | Cele.WS201_Fam_249_32_1 | 1 | 32 | 0.000000 | AAATTTATGAAAATTTAGGCCCATTTTGCCCA            |
| Cele.WS201 | Cele.WS201_Fam_250_32_1 | 1 | 32 | 0.000000 | TCTGGACTGGTGTAGTAGAGCTGCTTGGAGGT            |
| Cele.WS201 | Cele.WS201_Fam_251_31_1 | 1 | 31 | 0.000000 | CTGAAATTTCCAATTTTCCACAGTAAAAATGC            |
| Cele.WS201 | Cele.WS201_Fam_252_31_1 | 1 | 31 | 0.000000 | GTGACGTCACTTTTTTTGGCGAAAACCAAGT             |
| Cele.WS201 | Cele.WS201_Fam_253_31_1 | 1 | 31 | 0.000000 | GCTGATTTGGTCGGCATGTTCTGCTCATCATC            |
| Cele.WS201 | Cele.WS201_Fam_254_31_1 | 1 | 31 | 0.000000 | TGCGTCGGAAATGCATTCTTATCATCAGCGG             |
| Cele.WS201 | Cele.WS201_Fam_255_31_1 | 1 | 31 | 0.000000 | TCCGATGCATTGCCGATAATTGCCACCTGGT             |
| Cele.WS201 | Cele.WS201_Fam_256_31_1 | 1 | 31 | 0.000000 | TCTGAGCTACAGTACTCTGTCAAGAACAAT              |
| Cele.WS201 | Cele.WS201_Fam_257_31_1 | 1 | 31 | 0.000000 | GCAGCCGACAGTTCCTAGTTCGAAACTACAA             |
| Cele.WS201 | Cele.WS201_Fam_258_31_1 | 1 | 31 | 0.000000 | AGTCATTTTTTGGCCAATTTTTGACTATTTTC            |
| Cele.WS201 | Cele.WS201_Fam_259_31_1 | 1 | 31 | 0.000000 | TTGGCCAGAGCTCTCTTGACCTAAGCCCCC              |
| Cele.WS201 | Cele.WS201_Fam_260_30_1 | 1 | 30 | 0.000000 | AATTTGATTTATTTCCGAATTTTTTAGCGAA             |
| Cele.WS201 | Cele.WS201_Fam_261_30_1 | 1 | 30 | 0.000000 | TGGTGAAGTGGATTCCGGCAGTGGAAATGC              |
| Cele.WS201 | Cele.WS201_Fam_262_30_1 | 1 | 30 | 0.000000 | GAAAAATGATCTACAGCGAGATTTGGAGT               |
| Cele.WS201 | Cele.WS201_Fam_263_30_1 | 1 | 30 | 0.000000 | CAGCCCCAGCTCCGGCCCGAAGAGACCC                |
| Cele.WS201 | Cele.WS201_Fam_264_30_1 | 1 | 30 | 0.000000 | CAAACCTACAGTAGCACTGTAGTACCATAAC             |
| Cele.WS201 | Cele.WS201_Fam_265_30_1 | 1 | 30 | 0.000000 | TATGAAAGATCCTTCGATCAAGAAGTCACG              |
| Cele.WS201 | Cele.WS201_Fam_266_30_1 | 1 | 30 | 0.000000 | AAAAATCAAAAATTAGATGAATTTTTCGAATA            |
| Cele.WS201 | Cele.WS201_Fam_267_30_1 | 1 | 30 | 0.000000 | TTTTTCAACTTTTTTTCAGTTGAAGATTCAT             |
| Cele.WS201 | Cele.WS201_Fam_268_30_1 | 1 | 30 | 0.000000 | ATCTACTTTTTTCAGATTCGGTCGAAACTTG             |
| Cele.WS201 | Cele.WS201_Fam_269_30_1 | 1 | 30 | 0.000000 | ACTACCCAACCGGCTCCGGCAACTAGTCCG              |
| Cele.WS201 | Cele.WS201_Fam_270_29_1 | 1 | 29 | 0.000000 | AAAAATCGATTTTTTTCAAAAATTTTCCAG              |
| Cele.WS201 | Cele.WS201_Fam_271_27_1 | 1 | 27 | 0.000000 | GGCCAAATCTGGTGTCAAATTTTTTTA                 |
| Cele.WS201 | Cele.WS201_Fam_272_27_1 | 1 | 27 | 0.000000 | GCTGCTGGAGGATCAACTTCAACAAC                  |
| Cele.WS201 | Cele.WS201_Fam_273_27_1 | 1 | 27 | 0.000000 | TATTATAAATATAATATTACCTATTAT                 |

|            |                         |   |    |          |                            |
|------------|-------------------------|---|----|----------|----------------------------|
| Cele.WS201 | Cele.WS201_Fam_274_26_1 | 1 | 26 | 0.000000 | AAAATTAATAGATTTTCCAACTTTG  |
| Cele.WS201 | Cele.WS201_Fam_275_26_1 | 1 | 26 | 0.000000 | ATCTACAGTACCCCTATTCTAGAGTG |
| Cele.WS201 | Cele.WS201_Fam_276_26_1 | 1 | 26 | 0.000000 | CGTAGTAATAAATCCAACCTGCCATT |
| Cele.WS201 | Cele.WS201_Fam_277_26_1 | 1 | 26 | 0.000000 | ATTTACGGAGCTTCAAGTTAATGTTG |
| Cele.WS201 | Cele.WS201_Fam_278_26_1 | 1 | 26 | 0.000000 | TGTCAGTGCAAATGTTTTATTATTT  |
| Cele.WS201 | Cele.WS201_Fam_279_26_1 | 1 | 26 | 0.000000 | AAGTTCCAAAATTTCAAACATCCAA  |
| Cele.WS201 | Cele.WS201_Fam_280_24_1 | 1 | 24 | 0.000000 | AAGTAGGTCATGACCTAATTTTTT   |
| Cele.WS201 | Cele.WS201_Fam_281_24_1 | 1 | 24 | 0.000000 | TTTAATATACGCTATACATAAGTA   |
| Cele.WS201 | Cele.WS201_Fam_282_24_1 | 1 | 24 | 0.000000 | GTGCTCCGTGAGCATTGGGAATTT   |
| Cele.WS201 | Cele.WS201_Fam_283_24_1 | 1 | 24 | 0.000000 | AAAAACCGGCAAAAAAATCTTTTG   |
| Cele.WS201 | Cele.WS201_Fam_284_24_1 | 1 | 24 | 0.000000 | GAGTCTACCACAGAATCAACTACG   |
| Cele.WS201 | Cele.WS201_Fam_285_24_1 | 1 | 24 | 0.000000 | TTTTTTGGAAAAAATATATTGAT    |
| Cele.WS201 | Cele.WS201_Fam_286_24_1 | 1 | 24 | 0.000000 | TTTGAGTTTATCATCCTTATCTTT   |
| Cele.WS201 | Cele.WS201_Fam_287_23_1 | 1 | 23 | 0.000000 | GGACTAGAAATACTGAACGTGGT    |
| Cele.WS201 | Cele.WS201_Fam_288_23_1 | 1 | 23 | 0.000000 | TGGCCTAACTTTTCCTTATTTGG    |
| Cele.WS201 | Cele.WS201_Fam_289_23_1 | 1 | 23 | 0.000000 | CGCTGTAAGACCATTGCTGTAT     |
| Cele.WS201 | Cele.WS201_Fam_290_22_1 | 1 | 22 | 0.000000 | GCATGGCCTGACGGTCCTGAGG     |
| Cele.WS201 | Cele.WS201_Fam_291_22_1 | 1 | 22 | 0.000000 | ACTACAGTAATCTACGTCGCT      |
| Cele.WS201 | Cele.WS201_Fam_292_22_1 | 1 | 22 | 0.000000 | TTTAAGCCTAGCAGGGTCCAA      |
| Cele.WS201 | Cele.WS201_Fam_293_22_1 | 1 | 22 | 0.000000 | CCTTCCAAGAGCCTCACATGAT     |
| Cele.WS201 | Cele.WS201_Fam_294_22_1 | 1 | 22 | 0.000000 | TCTGGGGTAGGGCTGCCTAGGA     |
| Cele.WS201 | Cele.WS201_Fam_295_22_1 | 1 | 22 | 0.000000 | AATCTTAAATGCACATTTTTT      |
| Cele.WS201 | Cele.WS201_Fam_296_21_1 | 1 | 21 | 0.000000 | TGGCCTCGATTCTGTACAGGG      |
| Cele.WS201 | Cele.WS201_Fam_297_21_1 | 1 | 21 | 0.000000 | TCTCCTGGTAAATTTAAAAAT      |
| Cele.WS201 | Cele.WS201_Fam_298_21_1 | 1 | 21 | 0.000000 | CAAACCTTTTTGGCAGATTTT      |
| Cele.WS201 | Cele.WS201_Fam_299_21_1 | 1 | 21 | 0.000000 | ACCTGGCCAGATCGGTAGGCA      |
| Cele.WS201 | Cele.WS201_Fam_300_21_1 | 1 | 21 | 0.000000 | GCATAAAAACGTAAATTTTTAG     |
| Cele.WS201 | Cele.WS201_Fam_301_21_1 | 1 | 21 | 0.000000 | GCAATTTTCCCGTGCAGATCG      |
| Cele.WS201 | Cele.WS201_Fam_302_21_1 | 1 | 21 | 0.000000 | GCAGCGCCGGTCTCATCGAGC      |
| Cele.WS201 | Cele.WS201_Fam_303_21_1 | 1 | 21 | 0.000000 | AAAATAGCTTAAATTTGATTA      |
| Cele.WS201 | Cele.WS201_Fam_304_21_1 | 1 | 21 | 0.000000 | CTAGATTTTTTTGGCGTTGAC      |
| Cele.WS201 | Cele.WS201_Fam_305_21_1 | 1 | 21 | 0.000000 | CTAACATTTTTCAATTTTCGT      |
| Cele.WS201 | Cele.WS201_Fam_306_21_1 | 1 | 21 | 0.000000 | CTAATTAGCGTCGCTTTCGTT      |
| Cele.WS201 | Cele.WS201_Fam_307_21_1 | 1 | 21 | 0.000000 | AAAAGCCTAAAAACCCCAA        |
| Cele.WS201 | Cele.WS201_Fam_308_21_1 | 1 | 21 | 0.000000 | GATCTTCCAGCTACACCGTCT      |
| Cele.WS201 | Cele.WS201_Fam_309_21_1 | 1 | 21 | 0.000000 | TCAAATTAGATTACCTTTTTT      |
| Cele.WS201 | Cele.WS201_Fam_310_21_1 | 1 | 21 | 0.000000 | TTTGCACTGACCAACACGAGT      |
| Cele.WS201 | Cele.WS201_Fam_311_21_1 | 1 | 21 | 0.000000 | TGAAAGATTGGTCAGTGTCTA      |
| Cele.WS201 | Cele.WS201_Fam_312_20_1 | 1 | 20 | 0.000000 | TTCTAGGCCGTAGTAAACAT       |
| Cele.WS201 | Cele.WS201_Fam_313_20_1 | 1 | 20 | 0.000000 | TGGCAAAAATGGCAGAAAAA       |
| Cele.WS201 | Cele.WS201_Fam_314_20_1 | 1 | 20 | 0.000000 | TAAATCTACACAGGGTGGTG       |
| Cele.WS201 | Cele.WS201_Fam_315_20_1 | 1 | 20 | 0.000000 | TGTCGATTTACGGCGATCGA       |
| Cele.WS201 | Cele.WS201_Fam_316_20_1 | 1 | 20 | 0.000000 | TATTGATTTTTACCGGATGT       |
| Cele.WS201 | Cele.WS201_Fam_317_20_1 | 1 | 20 | 0.000000 | GGAAATTTTCCCGATTAGCC       |
| Cele.WS201 | Cele.WS201_Fam_318_20_1 | 1 | 20 | 0.000000 | GCTCGAGCTCAAACCCGAC        |
| Cele.WS201 | Cele.WS201_Fam_319_20_1 | 1 | 20 | 0.000000 | AAGGTTCTAGTAAATTCAG        |
| Cele.WS201 | Cele.WS201_Fam_320_20_1 | 1 | 20 | 0.000000 | TTCTGGAATTTTCCTGAGC        |
| Cele.WS201 | Cele.WS201_Fam_321_19_1 | 1 | 19 | 0.000000 | AAAATTTCTGAAAACTCGAG       |
| Cele.WS201 | Cele.WS201_Fam_322_19_1 | 1 | 19 | 0.000000 | TGGTCAGTGCACCTGCAAC        |
| Cele.WS201 | Cele.WS201_Fam_323_18_1 | 1 | 18 | 0.000000 | TTGTAGATCAACGGGGTC         |
| Cele.WS201 | Cele.WS201_Fam_324_18_1 | 1 | 18 | 0.000000 | GGCCTAGGATCCATCACT         |
| Cele.WS201 | Cele.WS201_Fam_325_18_1 | 1 | 18 | 0.000000 | TGCTCAAAGTGCTCGAGG         |
| Cele.WS201 | Cele.WS201_Fam_326_18_1 | 1 | 18 | 0.000000 | ATAGTTAGGCTACCTGTA         |
| Cele.WS201 | Cele.WS201_Fam_327_18_1 | 1 | 18 | 0.000000 | ACTACTGTATCGCAAGAT         |
| Cele.WS201 | Cele.WS201_Fam_328_18_1 | 1 | 18 | 0.000000 | ATATAATGTATATAATGC         |
| Cele.WS201 | Cele.WS201_Fam_329_18_1 | 1 | 18 | 0.000000 | CATTGTACGTTCTTCTC          |
| Cele.WS201 | Cele.WS201_Fam_330_18_1 | 1 | 18 | 0.000000 | TTTTGTGAGTTCAATAGT         |



|            |                         |   |    |          |                   |
|------------|-------------------------|---|----|----------|-------------------|
| Cele.WS201 | Cele.WS201_Fam_331_17_1 | 1 | 17 | 0.000000 | CGGCGGAAAAATCTACT |
| Cele.WS201 | Cele.WS201_Fam_332_17_1 | 1 | 17 | 0.000000 | AAAATCAAACCGGAGAC |
| Cele.WS201 | Cele.WS201_Fam_333_17_1 | 1 | 17 | 0.000000 | TAACCTGACTGCTATAT |
| Cele.WS201 | Cele.WS201_Fam_334_17_1 | 1 | 17 | 0.000000 | GAATTAGAAAACCTTGA |
| Cele.WS201 | Cele.WS201_Fam_335_17_1 | 1 | 17 | 0.000000 | TTGCAAGAAAATCTGCA |
| Cele.WS201 | Cele.WS201_Fam_336_17_1 | 1 | 17 | 0.000000 | TAGTTTTGCACCTCTAA |
| Cele.WS201 | Cele.WS201_Fam_337_16_1 | 1 | 16 | 0.000000 | TTTGGAAATGTCGGAAC |
| Cele.WS201 | Cele.WS201_Fam_338_16_1 | 1 | 16 | 0.000000 | TGATCTGATGATCTCA  |
| Cele.WS201 | Cele.WS201_Fam_339_16_1 | 1 | 16 | 0.000000 | GTACTGTAGGGAGAGG  |
| Cele.WS201 | Cele.WS201_Fam_340_16_1 | 1 | 16 | 0.000000 | CGGCAAATCGGCAGAC  |
| Cele.WS201 | Cele.WS201_Fam_341_16_1 | 1 | 16 | 0.000000 | ACCGCAACCTACCT    |
| Cele.WS201 | Cele.WS201_Fam_342_16_1 | 1 | 16 | 0.000000 | CTCCTAGGCTCCTAGG  |
| Cele.WS201 | Cele.WS201_Fam_343_16_1 | 1 | 16 | 0.000000 | CTTAGATCTCAATTCA  |
| Cele.WS201 | Cele.WS201_Fam_344_16_1 | 1 | 16 | 0.000000 | GGACCAAAGGGCCAAA  |
| Cele.WS201 | Cele.WS201_Fam_345_15_1 | 1 | 15 | 0.000000 | CGATGCTCCACCCGG   |
| Cele.WS201 | Cele.WS201_Fam_346_15_1 | 1 | 15 | 0.000000 | GAACCACCAAAGATT   |
| Cele.WS201 | Cele.WS201_Fam_347_15_1 | 1 | 15 | 0.000000 | AAAAGGGGATCTGCC   |
| Cele.WS201 | Cele.WS201_Fam_348_14_1 | 1 | 14 | 0.000000 | GAAGGATCGGGCCG    |
| Cele.WS201 | Cele.WS201_Fam_349_14_1 | 1 | 14 | 0.000000 | GGACTAAGGACTAG    |
| Cele.WS201 | Cele.WS201_Fam_350_13_1 | 1 | 13 | 0.000000 | GCTGCCGCCCGCC     |
| Cele.WS201 | Cele.WS201_Fam_351_13_1 | 1 | 13 | 0.000000 | CGTAGGCCATATA     |
| Cele.WS201 | Cele.WS201_Fam_352_12_1 | 1 | 12 | 0.000000 | ACCAGGACCAGG      |
| Cele.WS201 | Cele.WS201_Fam_353_12_1 | 1 | 12 | 0.000000 | AGTTATATAGTA      |
| Cele.WS201 | Cele.WS201_Fam_354_12_1 | 1 | 12 | 0.000000 | AGAAAGAGGAGA      |
| Cele.WS201 | Cele.WS201_Fam_355_12_1 | 1 | 12 | 0.000000 | CCTCCTCCACAT      |
| Cele.WS201 | Cele.WS201_Fam_356_12_1 | 1 | 12 | 0.000000 | GCTGGAGCTGGA      |
| Cele.WS201 | Cele.WS201_Fam_357_12_1 | 1 | 12 | 0.000000 | CATTGACTTGAG      |
| Cele.WS201 | Cele.WS201_Fam_358_11_1 | 1 | 11 | 0.000000 | GCTCTAAAAGT       |
| Cele.WS201 | Cele.WS201_Fam_359_11_1 | 1 | 11 | 0.000000 | CGGATAATTAA       |
| Cele.WS201 | Cele.WS201_Fam_360_11_1 | 1 | 11 | 0.000000 | AGATACACTTC       |
| Cele.WS201 | Cele.WS201_Fam_361_11_1 | 1 | 11 | 0.000000 | GTTGCGATTGC       |
| Cele.WS201 | Cele.WS201_Fam_362_11_1 | 1 | 11 | 0.000000 | ATCGGTGCTAC       |
| Cele.WS201 | Cele.WS201_Fam_363_10_1 | 1 | 10 | 0.000000 | TGGGGAAAAA        |
| Cele.WS201 | Cele.WS201_Fam_364_10_1 | 1 | 10 | 0.000000 | TATCTATATC        |

## C. briggsae

| Genome                                                                                                                                                                                  | Family name               | Number of sequences | Alignment length | Score    | Consensus without gaps                                       |
|-----------------------------------------------------------------------------------------------------------------------------------------------------------------------------------------|---------------------------|---------------------|------------------|----------|--------------------------------------------------------------|
| Cbrig.WS247                                                                                                                                                                             | Cbrig.WS247_Fam_1_16_1253 | 1253                | 33               | 0.401617 | AAATTCaGAAATTCaG                                             |
| Cbrig.WS247                                                                                                                                                                             | Cbrig.WS247_Fam_2_16_557  | 557                 | 16               | 0.854772 | ATTCTgAGATTCTGAG                                             |
| Cbrig.WS247                                                                                                                                                                             | Cbrig.WS247_Fam_3_22_70   | 70                  | 29               | 0.566840 | GACCTAgaAAAAAtTAGGTCA                                        |
| Cbrig.WS247                                                                                                                                                                             | Cbrig.WS247_Fam_4_15_56   | 56                  | 19               | 0.531203 | CgGAATcCngGAATC                                              |
| Cbrig.WS247                                                                                                                                                                             | Cbrig.WS247_Fam_5_21_47   | 47                  | 25               | 0.595954 | CATTTTTCATGatTTTtggnc                                        |
| Cbrig.WS247                                                                                                                                                                             | Cbrig.WS247_Fam_6_14_46   | 46                  | 17               | 0.690386 | GGTCCTGGGTCTG                                                |
| Cbrig.WS247                                                                                                                                                                             | Cbrig.WS247_Fam_7_16_40   | 40                  | 17               | 0.680581 | GTTCTaAAAtGTcGcg                                             |
| Cbrig.WS247                                                                                                                                                                             | Cbrig.WS247_Fam_8_20_31   | 31                  | 22               | 0.753014 | AGCCTCAGTAAAAAtTCCTA                                         |
| Cbrig.WS247                                                                                                                                                                             | Cbrig.WS247_Fam_9_15_31   | 31                  | 17               | 0.717521 | CGGATCcAGGTCACC                                              |
| Cbrig.WS247                                                                                                                                                                             | Cbrig.WS247_Fam_10_14_28  | 28                  | 14               | 0.870213 | TCCTTaTTCCTTAT                                               |
| Cbrig.WS247                                                                                                                                                                             | Cbrig.WS247_Fam_11_20_22  | 22                  | 20               | 0.780087 | CTGGAATTTTCTAGAAgtTT                                         |
| Cbrig.WS247                                                                                                                                                                             | Cbrig.WS247_Fam_12_10_19  | 19                  | 10               | 0.887719 | AAaTTCcAGA                                                   |
| Cbrig.WS247                                                                                                                                                                             | Cbrig.WS247_Fam_13_21_16  | 16                  | 22               | 0.708712 | GATTCCACCTccACCAGCTCc                                        |
| Cbrig.WS247                                                                                                                                                                             | Cbrig.WS247_Fam_14_15_16  | 16                  | 16               | 0.673090 | aAaCcGaCaTtTCG                                               |
| Cbrig.WS247                                                                                                                                                                             | Cbrig.WS247_Fam_15_163_15 | 15                  | 165              | 0.714613 |                                                              |
| GaaAAATtcGaaAAATcGgTtTTTtGAgCCcAAAATCgaaATTTTtGCTTCcAACTTTTTTCTgAatGaaCgAaTTCACgCaAATctTTtTGTAaaaAttAGTCaCnaTnATagTtTtTGTTcTAAanattTGcTTGtTCTGtCTTTTCaCAAAAcTcGtaTGT                    |                           |                     |                  |          |                                                              |
| Cbrig.WS247                                                                                                                                                                             | Cbrig.WS247_Fam_16_19_14  | 14                  | 19               | 0.971467 | AAATTCGGTCTTAAAA                                             |
| Cbrig.WS247                                                                                                                                                                             | Cbrig.WS247_Fam_17_29_12  | 12                  | 31               | 0.643043 | TGACCTAatTTTTnGnAtTTTCTAGGtCa                                |
| Cbrig.WS247                                                                                                                                                                             | Cbrig.WS247_Fam_18_26_12  | 12                  | 26               | 0.746698 | CCTAGATTTcaATTTTtAGGTCATGA                                   |
| Cbrig.WS247                                                                                                                                                                             | Cbrig.WS247_Fam_19_14_12  | 12                  | 18               | 0.641274 | TGgAATCTGgAATC                                               |
| Cbrig.WS247                                                                                                                                                                             | Cbrig.WS247_Fam_20_14_12  | 12                  | 17               | 0.605912 | CAGCTCCAGagCTC                                               |
| Cbrig.WS247                                                                                                                                                                             | Cbrig.WS247_Fam_21_16_12  | 12                  | 16               | 0.727273 | GATCcAGGGATCcAgG                                             |
| Cbrig.WS247                                                                                                                                                                             | Cbrig.WS247_Fam_22_13_11  | 11                  | 18               | 0.506229 | GGCCcAgGCCcnn                                                |
| Cbrig.WS247                                                                                                                                                                             | Cbrig.WS247_Fam_23_81_10  | 10                  | 81               | 0.965798 |                                                              |
| TGAGAGGATTGTTGTGAAAAATTAATAAGAcCCtTTtTCGTtGTTTTTGCATcAAATCTCCCCAGAGTTTGAAGGAACCAG                                                                                                       |                           |                     |                  |          |                                                              |
| Cbrig.WS247                                                                                                                                                                             | Cbrig.WS247_Fam_24_21_10  | 10                  | 26               | 0.428917 | aaGCnaTTTaGGcCnATTTt                                         |
| Cbrig.WS247                                                                                                                                                                             | Cbrig.WS247_Fam_25_13_9   | 9                   | 13               | 0.692308 | ctgACGGaCggAC                                                |
| Cbrig.WS247                                                                                                                                                                             | Cbrig.WS247_Fam_26_182_7  | 7                   | 184              | 0.914941 |                                                              |
| CATGTCATAATTGTGCTAGAAAGATGCTTTTTtAACcACcATGTTGAAAGATTCACTGAAGaGCGATGTCTAGAATaGCTCTCATTTTtGAGCGTTTTTtAGGTCAAATtACCGATTTTCTGTGAATTTTTTCAaGTATTCAACGGAAAgAtgGCCGTGTCACtATATTtTAACcAGATTAAG |                           |                     |                  |          |                                                              |
| Cbrig.WS247                                                                                                                                                                             | Cbrig.WS247_Fam_27_16_7   | 7                   | 16               | 0.781746 | tAgTTGCGAAATGTCA                                             |
| Cbrig.WS247                                                                                                                                                                             | Cbrig.WS247_Fam_28_15_7   | 7                   | 15               | 0.932275 | AAGATTTTCTTTAgG                                              |
| Cbrig.WS247                                                                                                                                                                             | Cbrig.WS247_Fam_29_30_6   | 6                   | 30               | 0.715556 | GGTgATAGTTGAAGcTGgAGtAGGTTcAGA                               |
| Cbrig.WS247                                                                                                                                                                             | Cbrig.WS247_Fam_30_19_6   | 6                   | 19               | 0.700585 | TGaCGCATTTTcaGtGCcT                                          |
| Cbrig.WS247                                                                                                                                                                             | Cbrig.WS247_Fam_31_16_5   | 5                   | 16               | 0.783333 | AAGcCCggAAGcCCgg                                             |
| Cbrig.WS247                                                                                                                                                                             | Cbrig.WS247_Fam_32_14_5   | 5                   | 15               | 0.740000 | aCTTcCGACTTCcG                                               |
| Cbrig.WS247                                                                                                                                                                             | Cbrig.WS247_Fam_33_11_5   | 5                   | 12               | 0.705556 | CTAtTTTAAcGc                                                 |
| Cbrig.WS247                                                                                                                                                                             | Cbrig.WS247_Fam_34_11_5   | 5                   | 12               | 0.800000 | tTACCgGTAAT                                                  |
| Cbrig.WS247                                                                                                                                                                             | Cbrig.WS247_Fam_35_146_4  | 4                   | 146              | 0.969559 |                                                              |
| TCATATTTCCACCGTAAGGTTTGGATGCAAAcTTcGTTGTTTTTCTCCGGTATCGGGTTGGAAAACTATGAGGGTCTCAATCcTGtGTAcGACTAcGAACCTTTGCTGTCGGCGTCTcAGTTGATTGATCCGGCcaGTA                                             |                           |                     |                  |          |                                                              |
| Cbrig.WS247                                                                                                                                                                             | Cbrig.WS247_Fam_36_60_4   | 4                   | 60               | 0.922222 | CaACATCaTCAGCTGAGACCTCGACAATcGCCACCTCGACCGCTGAGAcTActACAGTTc |
| Cbrig.WS247                                                                                                                                                                             | Cbrig.WS247_Fam_37_46_4   | 4                   | 47               | 0.686761 | TTTCTaGGtCATtTtGAAgTgGtGgCCTAAcTTTtgCaAaTtggT                |
| Cbrig.WS247                                                                                                                                                                             | Cbrig.WS247_Fam_38_27_4   | 4                   | 30               | 0.749074 | ATAGaTACCATAGaTACCATAGaTACC                                  |
| Cbrig.WS247                                                                                                                                                                             | Cbrig.WS247_Fam_39_19_4   | 4                   | 23               | 0.681159 | tAAGCTAAGCCTaAGgGt                                           |
| Cbrig.WS247                                                                                                                                                                             | Cbrig.WS247_Fam_40_22_4   | 4                   | 22               | 0.654040 | aAAaTtAgCcGAAATcaTgAA                                        |
| Cbrig.WS247                                                                                                                                                                             | Cbrig.WS247_Fam_41_21_4   | 4                   | 21               | 0.735450 | ATTTTtgAcCccAAAAttagTC                                       |
| Cbrig.WS247                                                                                                                                                                             | Cbrig.WS247_Fam_42_21_4   | 4                   | 21               | 0.904762 | ATTTACCgTAATtccATTTTG                                        |
| Cbrig.WS247                                                                                                                                                                             | Cbrig.WS247_Fam_43_21_4   | 4                   | 21               | 0.820106 | TAAGCcTATGCCAcAAaaAGc                                        |
| Cbrig.WS247                                                                                                                                                                             | Cbrig.WS247_Fam_44_16_4   | 4                   | 18               | 0.660494 | GATCcAAGATCCtAaG                                             |
| Cbrig.WS247                                                                                                                                                                             | Cbrig.WS247_Fam_45_16_4   | 4                   | 16               | 0.743056 | CTGGGtttCTGaatCT                                             |

|                                                                                                                                                                      |                          |   |     |          |                                                                 |
|----------------------------------------------------------------------------------------------------------------------------------------------------------------------|--------------------------|---|-----|----------|-----------------------------------------------------------------|
| Cbrig.WS247                                                                                                                                                          | Cbrig.WS247_Fam_46_254_3 | 3 | 255 | 0.939869 |                                                                 |
| TTTTTTTgATTTTTTGTcATAGAAACGTTtCACATTCAATTTCAAGTTACGTTCCCAAAATTTTCAGGCCAAATCTCTTATTTGAACAAAGTTATTAAGGATTgTTCTAAGCaTgTACTTAAGCCAAAATTCGGTTTTcAGGCTTTTGTCCATAAAGTTTCGTA |                          |   |     |          |                                                                 |
| TCGAGAAGAGATCTCGATCTGATATtCGAAttcGGTACCTaAatTTGAATGTaAAACGTTTTTCaTAACAAAAATCTCAAAAAATTGACAAAACA                                                                      |                          |   |     |          |                                                                 |
| Cbrig.WS247                                                                                                                                                          | Cbrig.WS247_Fam_47_167_3 | 3 | 167 | 0.946773 |                                                                 |
| TGACAGATTTTTGAtAGCcCttACAGaAACCGAGATaTATGGAACAGACGGCCGCTTCCGTCACACAGAGAACTTTGAGCTGAATTTGAGgGGTCTtATGCGAGTTAGCAAAAATACGTCAACTGAAGAAATGTTAACACACTTGTGCTAAGATTT         |                          |   |     |          |                                                                 |
| TATTAGT                                                                                                                                                              |                          |   |     |          |                                                                 |
| Cbrig.WS247                                                                                                                                                          | Cbrig.WS247_Fam_48_154_3 | 3 | 154 | 0.919192 |                                                                 |
| AAAAATgtTTGAAGTCAGTAGGGGAGCATTTTTtTAGTTgACAAAACATTTTTTaTcTtTCACAGGAACGGAGATAATGACTTGAAAAACCGAAATATTCAAGTTcATTTATTCCtATTCTGGTGAAGTTATCAATAAATAGTCAAcAAGT              |                          |   |     |          |                                                                 |
| Cbrig.WS247                                                                                                                                                          | Cbrig.WS247_Fam_49_139_3 | 3 | 139 | 0.968026 |                                                                 |
| ATTTCTCAATTTCGAACTGATTTTCTATAAAACaGCCCAATTTTCTGTTCCAAACCTTATCCGAAATcCAAATTTCTGTATATCgTAgCTGATGAGCGGAAATTTGGGCAGAATTgAAAATTAGAAAACCTGTGTTGTG                          |                          |   |     |          |                                                                 |
| Cbrig.WS247                                                                                                                                                          | Cbrig.WS247_Fam_50_111_3 | 3 | 111 | 0.855856 |                                                                 |
| GAAgACTGCGCaACaTagTTttggAaCTTgCaCGTTCCaAtATTTgCCATTTTGGTTCAGAAATGGCTCAGAAATCGGCTGGAGCAATGTgTCAaCTGGGTgTAACAGAAG                                                      |                          |   |     |          |                                                                 |
| Cbrig.WS247                                                                                                                                                          | Cbrig.WS247_Fam_51_111_3 | 3 | 111 | 0.975976 |                                                                 |
| AAATGGAAAAGAAGACTTGCTGAAAGGACCAATGAGcTTTTaGGCCAAAAATTTGTCGGATTTTCTCAAAATTAACCTTTAAGATTACGGCAGCAGTGTGTCAATGGAGA                                                       |                          |   |     |          |                                                                 |
| Cbrig.WS247                                                                                                                                                          | Cbrig.WS247_Fam_52_58_3  | 3 | 59  | 0.905838 | AAAAATtAAAAATCGCATTTCCAATTTTCAAAATTTCTGAATTTCTcTtCtAAAAATCAT    |
| Cbrig.WS247                                                                                                                                                          | Cbrig.WS247_Fam_53_47_3  | 3 | 50  | 0.593333 | tTACTGTAGTTTngGATTcAnTtTTCaaAnTTGAAAAAntGAGGa                   |
| Cbrig.WS247                                                                                                                                                          | Cbrig.WS247_Fam_54_42_3  | 3 | 42  | 0.957672 | GACTCGGTcGAtGTGGAGGTGATTCAGTCGAGGTACTcGTG                       |
| Cbrig.WS247                                                                                                                                                          | Cbrig.WS247_Fam_55_31_3  | 3 | 33  | 0.764310 | GnGACACTTcGAAGcCaGTCATTTTCGAAACC                                |
| Cbrig.WS247                                                                                                                                                          | Cbrig.WS247_Fam_56_30_3  | 3 | 30  | 0.881481 | ACTGGAGCAGCcTCGACTGGTTTCTcTTea                                  |
| Cbrig.WS247                                                                                                                                                          | Cbrig.WS247_Fam_57_24_3  | 3 | 28  | 0.603175 | TTTAgAATTTcAGaATTTCTGaaT                                        |
| Cbrig.WS247                                                                                                                                                          | Cbrig.WS247_Fam_58_27_3  | 3 | 27  | 0.967078 | AACCCCATGAACCCCATGAACCCCATt                                     |
| Cbrig.WS247                                                                                                                                                          | Cbrig.WS247_Fam_59_24_3  | 3 | 26  | 0.752137 | AATTCCCGCCaAAATatTTTTTTG                                        |
| Cbrig.WS247                                                                                                                                                          | Cbrig.WS247_Fam_60_26_3  | 3 | 26  | 0.743590 | AGTAcTcTtTGAaaTTcTgAAACTAC                                      |
| Cbrig.WS247                                                                                                                                                          | Cbrig.WS247_Fam_61_21_3  | 3 | 24  | 0.620370 | AgtTGAAnGGATTACTGTAGn                                           |
| Cbrig.WS247                                                                                                                                                          | Cbrig.WS247_Fam_62_24_3  | 3 | 24  | 0.703704 | TCCTTCTTGccTtTntCnTcCaGCT                                       |
| Cbrig.WS247                                                                                                                                                          | Cbrig.WS247_Fam_63_21_3  | 3 | 23  | 0.550725 | TTTTaAGTcgtTTTnGACTAt                                           |
| Cbrig.WS247                                                                                                                                                          | Cbrig.WS247_Fam_64_21_3  | 3 | 22  | 0.601010 | AgGcATTTTcAaaCCnATTTc                                           |
| Cbrig.WS247                                                                                                                                                          | Cbrig.WS247_Fam_65_21_3  | 3 | 22  | 0.702020 | TCCgAAaTCAGtcAAAAATgG                                           |
| Cbrig.WS247                                                                                                                                                          | Cbrig.WS247_Fam_66_21_3  | 3 | 21  | 0.798942 | TTTgTAGccCATTTTTCAGTca                                          |
| Cbrig.WS247                                                                                                                                                          | Cbrig.WS247_Fam_67_19_3  | 3 | 20  | 0.694444 | GTTTTAGAAcTTTTtggGAC                                            |
| Cbrig.WS247                                                                                                                                                          | Cbrig.WS247_Fam_68_19_3  | 3 | 19  | 0.883041 | TAGAGGTCCcaAAAAAAAT                                             |
| Cbrig.WS247                                                                                                                                                          | Cbrig.WS247_Fam_69_16_3  | 3 | 18  | 0.648148 | GAcCCATAGAcCCATg                                                |
| Cbrig.WS247                                                                                                                                                          | Cbrig.WS247_Fam_70_16_3  | 3 | 17  | 0.718954 | ACCTAGTTaCCgTAtA                                                |
| Cbrig.WS247                                                                                                                                                          | Cbrig.WS247_Fam_71_17_3  | 3 | 17  | 0.790850 | TCTCTTtACTACcaAG                                                |
| Cbrig.WS247                                                                                                                                                          | Cbrig.WS247_Fam_72_14_3  | 3 | 14  | 0.746032 | TAtAATaTAtAATA                                                  |
| Cbrig.WS247                                                                                                                                                          | Cbrig.WS247_Fam_73_10_3  | 3 | 11  | 0.767677 | CTTCAGaATC                                                      |
| Cbrig.WS247                                                                                                                                                          | Cbrig.WS247_Fam_74_11_3  | 3 | 11  | 0.757576 | CtTgcCCTGTt                                                     |
| Cbrig.WS247                                                                                                                                                          | Cbrig.WS247_Fam_75_10_3  | 3 | 10  | 0.733333 | AGcCtAGCtT                                                      |
| Cbrig.WS247                                                                                                                                                          | Cbrig.WS247_Fam_76_127_2 | 2 | 127 | 0.968504 |                                                                 |
| AACTTTTCACACCCCATTTTcCACTTTTTAAATTTTCCCTTTCAATTTTTCATCCTaATTTTTTCAATTTTCATTTTTTGTcCTACATTTTTCATTTCCAATTTTTTGTGCATATTTTTTCATTTCT                                      |                          |   |     |          |                                                                 |
| Cbrig.WS247                                                                                                                                                          | Cbrig.WS247_Fam_77_122_2 | 2 | 122 | 0.945355 |                                                                 |
| CATCAAACTACTaAAAAATAGACAGCAAGAATTTACTGTAGCCGAACAATTTTCGATCTaATGGGCTCTGTAGTCGCTTCAGcTGACGCACTAGCCTAAAAAGTAAATTTTGTAGCTCGTCAGAGc                                       |                          |   |     |          |                                                                 |
| Cbrig.WS247                                                                                                                                                          | Cbrig.WS247_Fam_78_83_2  | 2 | 83  | 1.000000 |                                                                 |
| CTCCGCCCACTTTTCAGAAAGTGGGCGTGGTCTTGAAATTCGAGATTGGGGCAAGCTTAAAACTAGCTCAAACCTCGAATAGG                                                                                  |                          |   |     |          |                                                                 |
| Cbrig.WS247                                                                                                                                                          | Cbrig.WS247_Fam_79_64_2  | 2 | 64  | 0.830729 | TTTGAATTTTtaAGAGAACACATGAGCCTGAGAATGGCTAAATTaTTGAGATTGAGtttggaa |
| Cbrig.WS247                                                                                                                                                          | Cbrig.WS247_Fam_80_53_2  | 2 | 53  | 0.685535 | ACGACAAAAATGCaAaAAATTTTaaATTTTccGaAATTTTGcATaCAgATTTG           |
| Cbrig.WS247                                                                                                                                                          | Cbrig.WS247_Fam_81_48_2  | 2 | 48  | 1.000000 | TTTTAGAAATTTTTGGTTCGAAATGTCTATTTTTTAAAAATGTGACG                 |
| Cbrig.WS247                                                                                                                                                          | Cbrig.WS247_Fam_82_48_2  | 2 | 48  | 0.888889 | TCGTGCTCGAcGATGGTACTTcAcTAGTTGAaCTGGATGGTTCGTGCTG               |
| Cbrig.WS247                                                                                                                                                          | Cbrig.WS247_Fam_83_45_2  | 2 | 45  | 0.762963 | AcGGAaCCTTCCACCcAACcACTGAAGTcCaACCACCACCc                       |
| Cbrig.WS247                                                                                                                                                          | Cbrig.WS247_Fam_84_41_2  | 2 | 41  | 1.000000 | GACGACAAAAATGCACAAAAATTTGAACTAATACGCCAGAGTT                     |
| Cbrig.WS247                                                                                                                                                          | Cbrig.WS247_Fam_85_36_2  | 2 | 36  | 0.703704 | cCCTACAGTAATcCTTTTGATTTTcaAtTaATTcTT                            |
| Cbrig.WS247                                                                                                                                                          | Cbrig.WS247_Fam_86_36_2  | 2 | 36  | 0.888889 | TCCTGGTGGTCTGGTGGTCCaGaTTGTCCGTCGAc                             |
| Cbrig.WS247                                                                                                                                                          | Cbrig.WS247_Fam_87_34_2  | 2 | 34  | 0.607843 | TGAAATTTcTGAaAATaTtGAAAACtCAAAATaATC                            |
| Cbrig.WS247                                                                                                                                                          | Cbrig.WS247_Fam_88_32_2  | 2 | 32  | 0.833333 | CgACATTTTAgAACcGCGACaTTTTCAaAACCG                               |
| Cbrig.WS247                                                                                                                                                          | Cbrig.WS247_Fam_89_30_2  | 2 | 30  | 0.733333 | TTCTAGAACCacCTaTTccAGaTCTGGACG                                  |
| Cbrig.WS247                                                                                                                                                          | Cbrig.WS247_Fam_90_27_2  | 2 | 27  | 1.000000 | GGAGCCCAGGACCACAAGGAGATGCC                                      |
| Cbrig.WS247                                                                                                                                                          | Cbrig.WS247_Fam_91_26_2  | 2 | 26  | 0.897436 | GAAACTACAGTAaCCcAGGaTCCTA                                       |

|                                                                                                                                                                   |                           |   |     |          |                         |
|-------------------------------------------------------------------------------------------------------------------------------------------------------------------|---------------------------|---|-----|----------|-------------------------|
| Cbrig.WS247                                                                                                                                                       | Cbrig.WS247_Fam_92_23_2   | 2 | 23  | 0.659420 | gGTaCCgAAAAaGGCTCAAAATG |
| Cbrig.WS247                                                                                                                                                       | Cbrig.WS247_Fam_93_22_2   | 2 | 22  | 0.636364 | GCCTAACcTTTgcTTaTTAaTG  |
| Cbrig.WS247                                                                                                                                                       | Cbrig.WS247_Fam_94_21_2   | 2 | 21  | 0.746032 | AAATTcaTcATTTTcAGGTCG   |
| Cbrig.WS247                                                                                                                                                       | Cbrig.WS247_Fam_95_21_2   | 2 | 21  | 0.682540 | ACATGGcTCCGTcGgGgGcTc   |
| Cbrig.WS247                                                                                                                                                       | Cbrig.WS247_Fam_96_21_2   | 2 | 21  | 1.000000 | TGGCCTAGAAAATAGGACTAG   |
| Cbrig.WS247                                                                                                                                                       | Cbrig.WS247_Fam_97_20_2   | 2 | 20  | 0.725000 | CGTTCGGTGATTTTTaTTTTt   |
| Cbrig.WS247                                                                                                                                                       | Cbrig.WS247_Fam_98_20_2   | 2 | 20  | 0.600000 | AACGGCCAAATcgtTaCgaT    |
| Cbrig.WS247                                                                                                                                                       | Cbrig.WS247_Fam_99_20_2   | 2 | 20  | 0.933333 | TGAGCCTACTTTTTGAGGaC    |
| Cbrig.WS247                                                                                                                                                       | Cbrig.WS247_Fam_100_18_2  | 2 | 18  | 0.611111 | GGaTTActGTAGTcATac      |
| Cbrig.WS247                                                                                                                                                       | Cbrig.WS247_Fam_101_18_2  | 2 | 18  | 0.703704 | CATAGaTaCCaAgGTAC       |
| Cbrig.WS247                                                                                                                                                       | Cbrig.WS247_Fam_102_16_2  | 2 | 16  | 0.708333 | TgAGaTTTTTTaATTC        |
| Cbrig.WS247                                                                                                                                                       | Cbrig.WS247_Fam_103_16_2  | 2 | 16  | 0.677083 | aATCaGAAATaTTGAA        |
| Cbrig.WS247                                                                                                                                                       | Cbrig.WS247_Fam_104_16_2  | 2 | 16  | 0.625000 | cTCTGGAaCtCAGAAa        |
| Cbrig.WS247                                                                                                                                                       | Cbrig.WS247_Fam_105_16_2  | 2 | 16  | 1.000000 | GAAATTCGATAACAGA        |
| Cbrig.WS247                                                                                                                                                       | Cbrig.WS247_Fam_106_16_2  | 2 | 16  | 0.750000 | TCCaAGATTCGGAaaC        |
| Cbrig.WS247                                                                                                                                                       | Cbrig.WS247_Fam_107_12_2  | 2 | 12  | 0.722222 | AAAAAtTCGAcA            |
| Cbrig.WS247                                                                                                                                                       | Cbrig.WS247_Fam_108_12_2  | 2 | 12  | 1.000000 | AAGCCTAAGCCT            |
| Cbrig.WS247                                                                                                                                                       | Cbrig.WS247_Fam_109_12_2  | 2 | 12  | 0.777778 | CATCTTCaCaTT            |
| Cbrig.WS247                                                                                                                                                       | Cbrig.WS247_Fam_110_12_2  | 2 | 12  | 0.888889 | GaAAACGGAAAC            |
| Cbrig.WS247                                                                                                                                                       | Cbrig.WS247_Fam_111_11_2  | 2 | 11  | 0.636364 | ATGGTAagCtT             |
| Cbrig.WS247                                                                                                                                                       | Cbrig.WS247_Fam_112_11_2  | 2 | 11  | 0.757576 | ATTTTTCAGcc             |
| Cbrig.WS247                                                                                                                                                       | Cbrig.WS247_Fam_113_11_2  | 2 | 11  | 0.757576 | GACCaGCGcCT             |
| Cbrig.WS247                                                                                                                                                       | Cbrig.WS247_Fam_114_10_2  | 2 | 10  | 0.600000 | CgAGAAcCAa              |
| Cbrig.WS247                                                                                                                                                       | Cbrig.WS247_Fam_115_10_2  | 2 | 10  | 0.600000 | TTCTAGacCa              |
| Cbrig.WS247                                                                                                                                                       | Cbrig.WS247_Fam_116_200_1 | 1 | 200 | 0.000000 |                         |
| AAATCTTTCAAAATCTAGGACCTACTCAAAAAGGAGAGGAAGATTCCTTAAGATTTTCAAAGAATTCAGAAGACAGGTTCCAATCTTCAATACACTTTTGAACACAGCTAAACCTTTGACTGACCGAAATATCAGTCAGCCATAGCCGTGCGGGCTCGAAA |                           |   |     |          |                         |
| GTGTAAAGGAAACCGGAAATTTGTCAAAAGAATACTAAGA                                                                                                                          |                           |   |     |          |                         |
| Cbrig.WS247                                                                                                                                                       | Cbrig.WS247_Fam_117_164_1 | 1 | 164 | 0.000000 |                         |
| AAACAATTTTGAAATGAAGGAATGGTTTAGTTCATTTTATTAATAAATAATTTATTTGAAAACGGAACAGTATGAAAACGCAGTTTGCAAAAAATAAAAAATCGCATTTCCAATTTTCAAATTTCTGAATTTCTTTTCTAAAAATCATAAAATTCAAAAA  |                           |   |     |          |                         |
| AAAC                                                                                                                                                              |                           |   |     |          |                         |
| Cbrig.WS247                                                                                                                                                       | Cbrig.WS247_Fam_118_163_1 | 1 | 163 | 0.000000 |                         |
| TCAGAAAAATATTGGAAGCGAAAATAGCGATTTGGACGATCAAAAACATAATTTTTCGAATATTTAGCATATGAATTTTCGAAAAGCCAGATCAAACAGATCTTTAAACAACATTATGACTGCGTTAAACGTTTTTACAGAAATATTTGCGTGAATTCGTT |                           |   |     |          |                         |
| AAT                                                                                                                                                               |                           |   |     |          |                         |
| Cbrig.WS247                                                                                                                                                       | Cbrig.WS247_Fam_119_163_1 | 1 | 163 | 0.000000 |                         |
| GAGATCTGCATGTTCTGCGGTTTATAAAATTCATATGAGAAAAATTTGAAAAATCTGTTTCTGACCCCAAAATCGTCATTTTTCGTTTCCACATTTTTTCAGAATGAACGAATTCACTCGAATCGTTTTGTAAAAATGTTAATTACTACTATCCGTCAAA  |                           |   |     |          |                         |
| TCT                                                                                                                                                               |                           |   |     |          |                         |
| Cbrig.WS247                                                                                                                                                       | Cbrig.WS247_Fam_120_161_1 | 1 | 161 | 0.000000 |                         |
| TGACGCTCTTGGATCTGATGGAGCGCAATTGCAATGACTTAAATTTCAAACACTGTAACCTTTTCTAGTGGACCAAAATTTTTGATTTTTTACACCATTAAAGAGGATTTTTTTTTGAATTTTAGCTGGCAATTCAAAATTTCAACAAATTCATTT      |                           |   |     |          |                         |
| T                                                                                                                                                                 |                           |   |     |          |                         |
| Cbrig.WS247                                                                                                                                                       | Cbrig.WS247_Fam_121_156_1 | 1 | 156 | 0.000000 |                         |
| GTGATGACCTAATTGAAAAAAGCAAAGTTTGACAAATTTGACTTTGGAGCTCTTGTGCGACCGCTCTTTTACAATTTTTTTCAGCTTACGACAGTCGTAACCTTAATTTAATAGCTAGCTTCAGAAAATAGAACCTATGTAAATTTCAAATGCCA       |                           |   |     |          |                         |
| Cbrig.WS247                                                                                                                                                       | Cbrig.WS247_Fam_122_145_1 | 1 | 145 | 0.000000 |                         |
| GGATTACTGTAGTTTTGTCTGTTCTACTAAAACCTACGGTATCTCAAGCTACAGTAATCCTAGAAAACATGAAAAATACACCAATCGACTCGGTTTCGTTGTTAACTTTTCGATTGAATACACTCTTGATTATATTTGAGAAAGTTTTT             |                           |   |     |          |                         |
| Cbrig.WS247                                                                                                                                                       | Cbrig.WS247_Fam_123_145_1 | 1 | 145 | 0.000000 |                         |
| TTCTAGGCCATCAACCTAAAAATGGTCATAACTTGGCTGAAAAATTGAGATTTTGAGCTGAACTGAATCCAATAGGTTGCTGAGATCATCCCTGTCAATTTTAAACCTATTTAGCTCCTGGTGGCATAGAAACCAACATTTGCAT                 |                           |   |     |          |                         |
| Cbrig.WS247                                                                                                                                                       | Cbrig.WS247_Fam_124_141_1 | 1 | 141 | 0.000000 |                         |
| GTGTTTGGCTACTTTTGGAACTACAGTAGCCCGAAAAAAGAATTTTACCGGAATCCATTGCTATGGGTATCAAAATGTCAGAAATTCATATAAAATCCAGTTATATGTTTTGAAAATCAAAAAATTCGCTAGGCGTG                         |                           |   |     |          |                         |
| Cbrig.WS247                                                                                                                                                       | Cbrig.WS247_Fam_125_140_1 | 1 | 140 | 0.000000 |                         |
| GATTCTATAGGAATGAAACATACTCTGGCTCCTCGTTACTGTTGGTAGTGGTTCCGCGTGATTTTACAGTTTTTGTAGAAATAGAAAGCTGTTTTGCGTGGGAGTGGGTTTGGAGTCATTCTAAAATGAAAGGTTTTCTTGTA                   |                           |   |     |          |                         |
| Cbrig.WS247                                                                                                                                                       | Cbrig.WS247_Fam_126_136_1 | 1 | 136 | 0.000000 |                         |
| GAATTCCTAGAAAATCATTCAAAATCTAGGACCTACTTAGGAAAAGGGAGGAAGATTTCTGAATATTTTAAAAGAATTCAGAAGACAATTTCTCAATCTCAATACCTTTTCGAACACAGCTAAACCTTTGACTGACT                         |                           |   |     |          |                         |
| Cbrig.WS247                                                                                                                                                       | Cbrig.WS247_Fam_127_131_1 | 1 | 131 | 0.000000 |                         |
| AGTCAAAAATCAAGCTGAAAAGTCTTCTTTTCTAGCGGTGTTGACTTAGCTGCCATATGGGTTGAAGACTATCCTCACGAGCTGAGATGGGAACTTTTTCGCCCAATTTCTTGAAAAATCTCTGTAAA                                  |                           |   |     |          |                         |
| Cbrig.WS247                                                                                                                                                       | Cbrig.WS247_Fam_128_122_1 | 1 | 122 | 0.000000 |                         |
| AATTTTCAGCCAGTGGAATGTGCCAACTGACAGTAGCAGGACCTGTGTAACGGGAAGAAGACTCGATGGCAATTTGACCTTCCAATTTAGCTTAATAGCCTGAAATTCAGGAAGATAGCT                                          |                           |   |     |          |                         |
| Cbrig.WS247                                                                                                                                                       | Cbrig.WS247_Fam_129_119_1 | 1 | 119 | 0.000000 |                         |
| AAATATTTTTCACGTCTTCATTTTAAAGTTTTTGTGAATATCTAGGTCAAAATGAAATTTCTGGATTTTTAAAAACACGTTTCGGAATGCACATTTTTTCTGAATCCATTAATATAA                                             |                           |   |     |          |                         |

|             |                           |   |     |          |                                                                                                             |
|-------------|---------------------------|---|-----|----------|-------------------------------------------------------------------------------------------------------------|
| Cbrig.WS247 | Cbrig.WS247_Fam_130_108_1 | 1 | 108 | 0.000000 |                                                                                                             |
|             |                           |   |     |          | GGAGAACGATATGCCAAGAAAGTCCCAGCTGCAACAAGATTTCCAAAGGTGATGGCCAACAGTTCGAAGCCAAAACACAGAATCAAGAGGACTTCACTCACATCAGT |
| Cbrig.WS247 | Cbrig.WS247_Fam_131_102_1 | 1 | 102 | 0.000000 |                                                                                                             |
|             |                           |   |     |          | TGGTCTTGGTCCGAATCCCGATGGTCCCTGTCCACGTTCTCCACGTCCTCCCGGTCCACGACGATCTGGGAAGTCCGAGTCAGGTCCAAGTCTGGTCTTTG       |
| Cbrig.WS247 | Cbrig.WS247_Fam_132_102_1 | 1 | 102 | 0.000000 |                                                                                                             |
|             |                           |   |     |          | AATTGATCGTCTACTGAAGGTCTAGACTCAACCACCATCAACAGATCCACGTATCAAGGAGGCACTGGTGACAGATTTCCAAGCTTCAAGACCAAAAAGATGC     |
| Cbrig.WS247 | Cbrig.WS247_Fam_133_99_1  | 1 | 99  | 0.000000 |                                                                                                             |
|             |                           |   |     |          | TCCGATGAGAATCGGCCTTCTAGCAGCTGTAGACTTTGGAGTAACTTTTGGTGGAGTTGTTTTAGCCGAGGCTTTTTCTCGTCGTCAGAAGAATCG            |
| Cbrig.WS247 | Cbrig.WS247_Fam_134_88_1  | 1 | 88  | 0.000000 |                                                                                                             |
|             |                           |   |     |          | TTTTTCAGAATGAACGAATTCACCTTGAATTATTTTGTAAAAATGTAATTACTACTATCCGTCAAATCTGAGATCTGCATGTTCTGCGC                   |
| Cbrig.WS247 | Cbrig.WS247_Fam_135_73_1  | 1 | 73  | 0.000000 | ACAACACTACATAGGAAACATTAGCAGACACATCATGCGCGTATTAGAAATGCGTCAGTTGGGTCTGTTAGACT                                  |
| Cbrig.WS247 | Cbrig.WS247_Fam_136_72_1  | 1 | 72  | 0.000000 | CAAGGAAGTACCTTTGAACCACGTAACGTTTCGTAGACGGAGCTTCGGTTCCCTTACACCCGACCACTAGTT                                    |
| Cbrig.WS247 | Cbrig.WS247_Fam_137_72_1  | 1 | 72  | 0.000000 | GATCCACAGTAACCAAATCTTCTTCTTTATCCGCTGTCCCATCAACCACACAGGCAACATCTAGTTCTAAGG                                    |
| Cbrig.WS247 | Cbrig.WS247_Fam_138_66_1  | 1 | 66  | 0.000000 | ATGGTACGTCGCGGACTACGACCGTACGCCAAGAGCACACGAGAAAATGATGTCTGCCACCGTTG                                           |
| Cbrig.WS247 | Cbrig.WS247_Fam_139_65_1  | 1 | 65  | 0.000000 | CTGAGAATTCGTTTGACATTGTCTCGGTTTTCCTTTACTCTTTCAAGCCCCGACGGCTATGGCTGA                                          |
| Cbrig.WS247 | Cbrig.WS247_Fam_140_64_1  | 1 | 64  | 0.000000 | TGTCFAATTTGGGAGACGACGAGAAACGACGAGAACGACGGGGGACGGTGGGACGGATGGAGGAGATGG                                       |
| Cbrig.WS247 | Cbrig.WS247_Fam_141_63_1  | 1 | 63  | 0.000000 | GAGACTCCAGAGACTCCAGAAACATCAGAGACCACCTTGACTCCTCCAACCTGGAACCTACAGCC                                           |
| Cbrig.WS247 | Cbrig.WS247_Fam_142_63_1  | 1 | 63  | 0.000000 | CTGGACGCTTCTTCCTCCTCAGCTCCTTGGGTTCCCTTTGGCCGATCCTCAGCAGCTCTAG                                               |
| Cbrig.WS247 | Cbrig.WS247_Fam_143_63_1  | 1 | 63  | 0.000000 | TCCTTGAGTCTTGGCTCCAACCTGGGCGGCGAGCTCTGGCTGGGCGGTGTTGTTGAGCATCAGC                                            |
| Cbrig.WS247 | Cbrig.WS247_Fam_144_61_1  | 1 | 61  | 0.000000 | GATTACTGTAGATTGGGTCAAAGAGTCAATTTTAAGTCAAGAATCGAAATTTTGGATCAG                                                |
| Cbrig.WS247 | Cbrig.WS247_Fam_145_60_1  | 1 | 60  | 0.000000 | ACGGAACCATGTCTGAATTCACGCTTCCGAAACTACCACAGAACCCTGTGAGACCACG                                                  |
| Cbrig.WS247 | Cbrig.WS247_Fam_146_57_1  | 1 | 57  | 0.000000 | TTTCCGAATTTCTGAATTTCAAGGATTTCAAGGATTTCAAGACTTCAGGACTTCAGGA                                                  |
| Cbrig.WS247 | Cbrig.WS247_Fam_147_56_1  | 1 | 56  | 0.000000 | CCAGAAAACGCATCAGATGAATTCAGGTCATTTCTAGGCCATTTCTACATGGTGG                                                     |
| Cbrig.WS247 | Cbrig.WS247_Fam_148_56_1  | 1 | 56  | 0.000000 | TTCTAGGCCACCGTCAGTCAGTGGTCCAGAATTTGTCAGAATTTACATGGTGGAT                                                     |
| Cbrig.WS247 | Cbrig.WS247_Fam_149_54_1  | 1 | 54  | 0.000000 | TCTGGAGAAGAGGCTACCCTGCTGCCGCCACTGAAGCCACAGTCGCCGAAGCA                                                       |
| Cbrig.WS247 | Cbrig.WS247_Fam_150_54_1  | 1 | 54  | 0.000000 | TGTGCTAGAAAGATGCTTTTTAACACCATGTTGAAAGATTCACCTGAAGTGCGA                                                      |
| Cbrig.WS247 | Cbrig.WS247_Fam_151_54_1  | 1 | 54  | 0.000000 | TTTTTTAATTTTGAACACTGCGTTTTCACTGTTCCGTTCTCAAATGAATTA                                                         |
| Cbrig.WS247 | Cbrig.WS247_Fam_152_51_1  | 1 | 51  | 0.000000 | TTCTTCAGATCCTCCGACTGGTGTGTGGAAGATGCATCGGATGGATTTGG                                                          |
| Cbrig.WS247 | Cbrig.WS247_Fam_153_48_1  | 1 | 48  | 0.000000 | TGGCCTAGAAAATGCAAAAATCTGGAAAATTAGACAATTTTGGTGGG                                                             |
| Cbrig.WS247 | Cbrig.WS247_Fam_154_48_1  | 1 | 48  | 0.000000 | TCAGTTGTAACAAGTCTCCGCTCTGGTCCAATGGCAAATCCAGTGGGA                                                            |
| Cbrig.WS247 | Cbrig.WS247_Fam_155_48_1  | 1 | 48  | 0.000000 | TTTTCTAGGCCATCGGGCAAAAATACATGTGGTGGCCTAGAAAATCCAAG                                                          |
| Cbrig.WS247 | Cbrig.WS247_Fam_156_47_1  | 1 | 47  | 0.000000 | TTTTCTAGGCCACGAAAAGTTTGTAGTGGACTAGGTTTTTCGATTTTAAGA                                                         |
| Cbrig.WS247 | Cbrig.WS247_Fam_157_46_1  | 1 | 46  | 0.000000 | TTTTCTAGGCCGATGCTCTTCATGGCCTGGGAATCCCGTTTTTGGG                                                              |
| Cbrig.WS247 | Cbrig.WS247_Fam_158_45_1  | 1 | 45  | 0.000000 | ACACCAGCAGGCCGCTGGACCAACCATGACGACAACAAAACCT                                                                 |
| Cbrig.WS247 | Cbrig.WS247_Fam_159_43_1  | 1 | 43  | 0.000000 | GTCAAAAATCCGTAATTTTGTATCCGAAATTTCAATTTTTTTAT                                                                |
| Cbrig.WS247 | Cbrig.WS247_Fam_160_43_1  | 1 | 43  | 0.000000 | AATTTGGCTGAAATGCTAGAAAATAGGATAAAAATGGCGGA                                                                   |
| Cbrig.WS247 | Cbrig.WS247_Fam_161_42_1  | 1 | 42  | 0.000000 | GAGAGCATTTTTTAAATTTCCAAAAGATGCAATTTCTCAATA                                                                  |
| Cbrig.WS247 | Cbrig.WS247_Fam_162_42_1  | 1 | 42  | 0.000000 | ATTTTTGACCCAATATGACCATTTATAGCCAAATTTGAGTC                                                                   |
| Cbrig.WS247 | Cbrig.WS247_Fam_163_42_1  | 1 | 42  | 0.000000 | GGTCATTTTTTGTACTATTTTAGGCCTATTTTGGACCAATTA                                                                  |
| Cbrig.WS247 | Cbrig.WS247_Fam_164_42_1  | 1 | 42  | 0.000000 | TAGTGATTTTCCGGCTCAAAAATCCGCTTTTTTGGGGTCAAAAT                                                                |
| Cbrig.WS247 | Cbrig.WS247_Fam_165_42_1  | 1 | 42  | 0.000000 | AAATGACTATTTTCAACCTAAAACCTGGCTATTTTAAAGCCTGA                                                                |
| Cbrig.WS247 | Cbrig.WS247_Fam_166_42_1  | 1 | 42  | 0.000000 | GCTTAAAATGACCAATTTTGGATCTAATTTTGTCTCATTTTTG                                                                 |
| Cbrig.WS247 | Cbrig.WS247_Fam_167_42_1  | 1 | 42  | 0.000000 | TTTTGGACCACTTTGCATGAATTTTGAACCGTTTTCCATGAA                                                                  |
| Cbrig.WS247 | Cbrig.WS247_Fam_168_41_1  | 1 | 41  | 0.000000 | CGGAAAATCGAGTTCTCGAATTTTTTCTCGACTTTTTTTTTTC                                                                 |
| Cbrig.WS247 | Cbrig.WS247_Fam_169_39_1  | 1 | 39  | 0.000000 | TGCCACGTGGCTGCTGCTGGTGTCTGCTGGTCTTGATAAT                                                                    |
| Cbrig.WS247 | Cbrig.WS247_Fam_170_38_1  | 1 | 38  | 0.000000 | TGGTACCATAGGTTTTCAATAGTTCATGGAGTTTAAA                                                                       |
| Cbrig.WS247 | Cbrig.WS247_Fam_171_38_1  | 1 | 38  | 0.000000 | CGCAAAGGCCACAAAATGCGTCAAGACACTAGAAAAG                                                                       |
| Cbrig.WS247 | Cbrig.WS247_Fam_172_38_1  | 1 | 38  | 0.000000 | AGCCGATCGCGCATCGGCTAGTGTGGTTCGGATGTGTC                                                                      |
| Cbrig.WS247 | Cbrig.WS247_Fam_173_37_1  | 1 | 37  | 0.000000 | GGACAACCTGAGAAAATTTGTTTTTCAACAAAACAGAT                                                                      |
| Cbrig.WS247 | Cbrig.WS247_Fam_174_36_1  | 1 | 36  | 0.000000 | TACTGTAGAAAAGGGAAATTTTCAAAAATCAAGAAC                                                                        |
| Cbrig.WS247 | Cbrig.WS247_Fam_175_36_1  | 1 | 36  | 0.000000 | GGAGCTCCAGGAGCCCCAGGACAAGGATCAGGAGCC                                                                        |
| Cbrig.WS247 | Cbrig.WS247_Fam_176_35_1  | 1 | 35  | 0.000000 | TACAGTAATCCTTTGGAATTTGGTAATAAAAAATC                                                                         |
| Cbrig.WS247 | Cbrig.WS247_Fam_177_35_1  | 1 | 35  | 0.000000 | TGGCCTAGAAAACCAAAATTTGCAATTTCTCAGCCA                                                                        |
| Cbrig.WS247 | Cbrig.WS247_Fam_178_35_1  | 1 | 35  | 0.000000 | GGGCCCTTCTATTACAGGGGCTTTCAATTAGAGG                                                                          |
| Cbrig.WS247 | Cbrig.WS247_Fam_179_34_1  | 1 | 34  | 0.000000 | ACTCGGAATAAGTAGTACCAATTCGATACTACTT                                                                          |
| Cbrig.WS247 | Cbrig.WS247_Fam_180_32_1  | 1 | 32  | 0.000000 | ATTCAGATTTCTCAGATTTCTGAAGTTGCGGA                                                                            |
| Cbrig.WS247 | Cbrig.WS247_Fam_181_32_1  | 1 | 32  | 0.000000 | AGCCATTTTTGACCTATTTTAAAGCAATTTGC                                                                            |

|             |                          |   |    |          |                                  |
|-------------|--------------------------|---|----|----------|----------------------------------|
| Cbrig.WS247 | Cbrig.WS247_Fam_182_31_1 | 1 | 31 | 0.000000 | ATTCGGATTCCGGATTCTGTCCATTTTTTC   |
| Cbrig.WS247 | Cbrig.WS247_Fam_183_31_1 | 1 | 31 | 0.000000 | GTTGCAAAATGCCTGGTTCATAACGTCACG   |
| Cbrig.WS247 | Cbrig.WS247_Fam_184_31_1 | 1 | 31 | 0.000000 | TTTCAGCGATCCTCAGCTATTTTTAGGCATG  |
| Cbrig.WS247 | Cbrig.WS247_Fam_185_31_1 | 1 | 31 | 0.000000 | AGCGATTTTTTCTAGGAATTTTGAGGTTTTTA |
| Cbrig.WS247 | Cbrig.WS247_Fam_186_31_1 | 1 | 31 | 0.000000 | AAAATCATGATTTTTTAGGTTAAAATGACCG  |
| Cbrig.WS247 | Cbrig.WS247_Fam_187_31_1 | 1 | 31 | 0.000000 | GCAGTAGCAAATTCGGTGTACTACTGCTTA   |
| Cbrig.WS247 | Cbrig.WS247_Fam_188_30_1 | 1 | 30 | 0.000000 | CTATAAACTACAGAATCTAGACTACAGAAG   |
| Cbrig.WS247 | Cbrig.WS247_Fam_189_30_1 | 1 | 30 | 0.000000 | TCTAATAGCTCAAAAAATGGGTCCCAATGT   |
| Cbrig.WS247 | Cbrig.WS247_Fam_190_30_1 | 1 | 30 | 0.000000 | CTGGAAC TTTCTAGAACGTTGTGGACTTTT  |
| Cbrig.WS247 | Cbrig.WS247_Fam_191_29_1 | 1 | 29 | 0.000000 | GATCCAGGTCACCCGGTCAAGGTCACCCG    |
| Cbrig.WS247 | Cbrig.WS247_Fam_192_29_1 | 1 | 29 | 0.000000 | GAATCGGAGAATCGGAGCTGGTGAAGGTG    |
| Cbrig.WS247 | Cbrig.WS247_Fam_193_29_1 | 1 | 29 | 0.000000 | AAAATTAGGTCACGAAATAGAAATACGAG    |
| Cbrig.WS247 | Cbrig.WS247_Fam_194_29_1 | 1 | 29 | 0.000000 | GATGCCAGTGATATACTCCCGTATATCCT    |
| Cbrig.WS247 | Cbrig.WS247_Fam_195_28_1 | 1 | 28 | 0.000000 | TACAGTAATCCAAGAAATTAGTTAAAAC     |
| Cbrig.WS247 | Cbrig.WS247_Fam_196_28_1 | 1 | 28 | 0.000000 | GAAAAATGGGGGTCAAAAAATCGAAGT      |
| Cbrig.WS247 | Cbrig.WS247_Fam_197_28_1 | 1 | 28 | 0.000000 | GGATCCGGACCCAGAAGTCCGGAGTCA      |
| Cbrig.WS247 | Cbrig.WS247_Fam_198_27_1 | 1 | 27 | 0.000000 | GTGGTAGTCTCCTCGACATATGGAGTC      |
| Cbrig.WS247 | Cbrig.WS247_Fam_199_27_1 | 1 | 27 | 0.000000 | TTCCACGCTCTCCACGTCTCCACGTT       |
| Cbrig.WS247 | Cbrig.WS247_Fam_200_27_1 | 1 | 27 | 0.000000 | CCGAGGATCCCATGGATCTCAAGGATC      |
| Cbrig.WS247 | Cbrig.WS247_Fam_201_27_1 | 1 | 27 | 0.000000 | TACAGTGCTTACAGTGCTTACAGTGCT      |
| Cbrig.WS247 | Cbrig.WS247_Fam_202_27_1 | 1 | 27 | 0.000000 | TATTTTTGAGGCACGTAACGTGCCTTG      |
| Cbrig.WS247 | Cbrig.WS247_Fam_203_27_1 | 1 | 27 | 0.000000 | CCACCATTTCTCCATTTCCGCCATGG       |
| Cbrig.WS247 | Cbrig.WS247_Fam_204_27_1 | 1 | 27 | 0.000000 | CAAGTACCGTACTTTTGATCTCTGAAA      |
| Cbrig.WS247 | Cbrig.WS247_Fam_205_26_1 | 1 | 26 | 0.000000 | ACCTAATTTTACAAAATCGAGGTCGG       |
| Cbrig.WS247 | Cbrig.WS247_Fam_206_26_1 | 1 | 26 | 0.000000 | GAATACTACAATAGTCTAATATCCA        |
| Cbrig.WS247 | Cbrig.WS247_Fam_207_26_1 | 1 | 26 | 0.000000 | GACAAATCAACGAAGGAGATGAGCC        |
| Cbrig.WS247 | Cbrig.WS247_Fam_208_25_1 | 1 | 25 | 0.000000 | CATAGCTGACATTGCTGACCTAGAC        |
| Cbrig.WS247 | Cbrig.WS247_Fam_209_25_1 | 1 | 25 | 0.000000 | ATTGAAATCTTGTTTCATTGCCTAGA       |
| Cbrig.WS247 | Cbrig.WS247_Fam_210_25_1 | 1 | 25 | 0.000000 | TCTGAATCTCTGAATTACCTATTAT        |
| Cbrig.WS247 | Cbrig.WS247_Fam_211_24_1 | 1 | 24 | 0.000000 | TATCAGAATCTCATAGATTGAAGA         |
| Cbrig.WS247 | Cbrig.WS247_Fam_212_24_1 | 1 | 24 | 0.000000 | CAAAAGGGGTTCGATTTTGAATAAT        |
| Cbrig.WS247 | Cbrig.WS247_Fam_213_24_1 | 1 | 24 | 0.000000 | TCCTCCTGGGATGTTCCCTCCGAA         |
| Cbrig.WS247 | Cbrig.WS247_Fam_214_24_1 | 1 | 24 | 0.000000 | GATGTACCCTGGAATCCTTTCCCT         |
| Cbrig.WS247 | Cbrig.WS247_Fam_215_23_1 | 1 | 23 | 0.000000 | GCCTAGAAAACCTCCTGAATTGGT         |
| Cbrig.WS247 | Cbrig.WS247_Fam_216_23_1 | 1 | 23 | 0.000000 | TGGCCTAAAAACCCGTGTTTCAA          |
| Cbrig.WS247 | Cbrig.WS247_Fam_217_22_1 | 1 | 22 | 0.000000 | AAATAAGCCTAAATTAGGTCAA           |
| Cbrig.WS247 | Cbrig.WS247_Fam_218_22_1 | 1 | 22 | 0.000000 | GGTATCATTTTCAATAAATAT            |
| Cbrig.WS247 | Cbrig.WS247_Fam_219_22_1 | 1 | 22 | 0.000000 | ACCATATGATACATAGAGATGA           |
| Cbrig.WS247 | Cbrig.WS247_Fam_220_22_1 | 1 | 22 | 0.000000 | AAAATGGACCTGAAGGAGGGCA           |
| Cbrig.WS247 | Cbrig.WS247_Fam_221_21_1 | 1 | 21 | 0.000000 | AAGTTAGGCCACGACTTTCGG            |
| Cbrig.WS247 | Cbrig.WS247_Fam_222_21_1 | 1 | 21 | 0.000000 | GGTTACTGTAGCTTTTTTCTG            |
| Cbrig.WS247 | Cbrig.WS247_Fam_223_21_1 | 1 | 21 | 0.000000 | GGGATCTAGGTCATGGTATT             |
| Cbrig.WS247 | Cbrig.WS247_Fam_224_21_1 | 1 | 21 | 0.000000 | CATGGGCAAGTACAGGCAAGC            |
| Cbrig.WS247 | Cbrig.WS247_Fam_225_21_1 | 1 | 21 | 0.000000 | TCTAGCTTAAAATAGGCCTTT            |
| Cbrig.WS247 | Cbrig.WS247_Fam_226_21_1 | 1 | 21 | 0.000000 | CTACAACACTACAACGCCTAGG           |
| Cbrig.WS247 | Cbrig.WS247_Fam_227_21_1 | 1 | 21 | 0.000000 | AAGGTACCATTGTATCATTGA            |
| Cbrig.WS247 | Cbrig.WS247_Fam_228_21_1 | 1 | 21 | 0.000000 | TCCGGATCCCGGATGCCTGTG            |
| Cbrig.WS247 | Cbrig.WS247_Fam_229_21_1 | 1 | 21 | 0.000000 | GATTCGGTTCGAGGTAAGGTTG           |
| Cbrig.WS247 | Cbrig.WS247_Fam_230_21_1 | 1 | 21 | 0.000000 | ACTACGGAACCTTCCACTATC            |
| Cbrig.WS247 | Cbrig.WS247_Fam_231_21_1 | 1 | 21 | 0.000000 | ATTTTGGCTCTTGA AACCTG            |
| Cbrig.WS247 | Cbrig.WS247_Fam_232_21_1 | 1 | 21 | 0.000000 | AAAATAGGTCATGCCATTTAA            |
| Cbrig.WS247 | Cbrig.WS247_Fam_233_20_1 | 1 | 20 | 0.000000 | CTGACCGACCACCGATCAAT             |
| Cbrig.WS247 | Cbrig.WS247_Fam_234_20_1 | 1 | 20 | 0.000000 | TTTCTAGGCCATCAGTGAGG             |
| Cbrig.WS247 | Cbrig.WS247_Fam_235_20_1 | 1 | 20 | 0.000000 | AAATTCAGAAAAATTGACGGC            |
| Cbrig.WS247 | Cbrig.WS247_Fam_236_20_1 | 1 | 20 | 0.000000 | GTCTATTAGAAGAGATGCAG             |
| Cbrig.WS247 | Cbrig.WS247_Fam_237_20_1 | 1 | 20 | 0.000000 | AAGATGGTACCTCAGCTGGG             |
| Cbrig.WS247 | Cbrig.WS247_Fam_238_20_1 | 1 | 20 | 0.000000 | AGCATGATCCCATCCCTCTC             |

|             |                          |   |    |          |                     |
|-------------|--------------------------|---|----|----------|---------------------|
| Cbrig.WS247 | Cbrig.WS247_Fam_239_19_1 | 1 | 19 | 0.000000 | ACCATGAAGTGCCATGGA  |
| Cbrig.WS247 | Cbrig.WS247_Fam_240_19_1 | 1 | 19 | 0.000000 | TACTGTAGTTCAAAAAGAC |
| Cbrig.WS247 | Cbrig.WS247_Fam_241_19_1 | 1 | 19 | 0.000000 | AAATGTGTCAAGGAATCAA |
| Cbrig.WS247 | Cbrig.WS247_Fam_242_19_1 | 1 | 19 | 0.000000 | AAACCACGAGAGTCCCAA  |
| Cbrig.WS247 | Cbrig.WS247_Fam_243_19_1 | 1 | 19 | 0.000000 | TTAGTCCTAACCGCAAGAG |
| Cbrig.WS247 | Cbrig.WS247_Fam_244_18_1 | 1 | 18 | 0.000000 | TTTTGAAAAAAAAAATTT  |
| Cbrig.WS247 | Cbrig.WS247_Fam_245_18_1 | 1 | 18 | 0.000000 | CAGAAGACGTCAAGGATT  |
| Cbrig.WS247 | Cbrig.WS247_Fam_246_18_1 | 1 | 18 | 0.000000 | CAGATGGTTCGGTTCAT   |
| Cbrig.WS247 | Cbrig.WS247_Fam_247_18_1 | 1 | 18 | 0.000000 | GGGTCTCTGGTGACCCGG  |
| Cbrig.WS247 | Cbrig.WS247_Fam_248_17_1 | 1 | 17 | 0.000000 | AGGGTACATCGGATCAG   |
| Cbrig.WS247 | Cbrig.WS247_Fam_249_17_1 | 1 | 17 | 0.000000 | TGTTTTGTTCTAATATC   |
| Cbrig.WS247 | Cbrig.WS247_Fam_250_16_1 | 1 | 16 | 0.000000 | GTAATAATTTTAGGCTT   |
| Cbrig.WS247 | Cbrig.WS247_Fam_251_16_1 | 1 | 16 | 0.000000 | GATTCTGGATTTTAAG    |
| Cbrig.WS247 | Cbrig.WS247_Fam_252_16_1 | 1 | 16 | 0.000000 | CTCGCTGTCTCGCTGT    |
| Cbrig.WS247 | Cbrig.WS247_Fam_253_16_1 | 1 | 16 | 0.000000 | TTTGCAACTAGGAAAA    |
| Cbrig.WS247 | Cbrig.WS247_Fam_254_16_1 | 1 | 16 | 0.000000 | CTATAACGCTATAACG    |
| Cbrig.WS247 | Cbrig.WS247_Fam_255_16_1 | 1 | 16 | 0.000000 | TTAATGGGTTAATGTT    |
| Cbrig.WS247 | Cbrig.WS247_Fam_256_16_1 | 1 | 16 | 0.000000 | TGGTCTCTGGTCCAC     |
| Cbrig.WS247 | Cbrig.WS247_Fam_257_16_1 | 1 | 16 | 0.000000 | AAGCCCGAAAGTTTGG    |
| Cbrig.WS247 | Cbrig.WS247_Fam_258_16_1 | 1 | 16 | 0.000000 | TTCATAGGGCGACGAG    |
| Cbrig.WS247 | Cbrig.WS247_Fam_259_16_1 | 1 | 16 | 0.000000 | CAGTCTATTCAGAG      |
| Cbrig.WS247 | Cbrig.WS247_Fam_260_15_1 | 1 | 15 | 0.000000 | TGTAAGCTATGAGCT     |
| Cbrig.WS247 | Cbrig.WS247_Fam_261_15_1 | 1 | 15 | 0.000000 | CATCCTCCGCTGGAT     |
| Cbrig.WS247 | Cbrig.WS247_Fam_262_14_1 | 1 | 14 | 0.000000 | AAGTGAAAAAATAT      |
| Cbrig.WS247 | Cbrig.WS247_Fam_263_14_1 | 1 | 14 | 0.000000 | TTTTTGTGCTATAA      |
| Cbrig.WS247 | Cbrig.WS247_Fam_264_14_1 | 1 | 14 | 0.000000 | ACCGCAGACCTAAG      |
| Cbrig.WS247 | Cbrig.WS247_Fam_265_14_1 | 1 | 14 | 0.000000 | CTCGGGGCTCGGGG      |
| Cbrig.WS247 | Cbrig.WS247_Fam_266_14_1 | 1 | 14 | 0.000000 | TACGAACTACATAC      |
| Cbrig.WS247 | Cbrig.WS247_Fam_267_12_1 | 1 | 12 | 0.000000 | GGATGGACGGAT        |
| Cbrig.WS247 | Cbrig.WS247_Fam_268_12_1 | 1 | 12 | 0.000000 | TGGTGGTGGAGG        |
| Cbrig.WS247 | Cbrig.WS247_Fam_269_12_1 | 1 | 12 | 0.000000 | GCCCTAGCCCTA        |
| Cbrig.WS247 | Cbrig.WS247_Fam_270_12_1 | 1 | 12 | 0.000000 | ATGGGACCCATC        |
| Cbrig.WS247 | Cbrig.WS247_Fam_271_11_1 | 1 | 11 | 0.000000 | GCGAGCGACGG         |
| Cbrig.WS247 | Cbrig.WS247_Fam_272_11_1 | 1 | 11 | 0.000000 | TTTGGGCAAGT         |
| Cbrig.WS247 | Cbrig.WS247_Fam_273_11_1 | 1 | 11 | 0.000000 | AGCCGGCCGAC         |
| Cbrig.WS247 | Cbrig.WS247_Fam_274_10_1 | 1 | 10 | 0.000000 | TCGAGTCTCG          |
| Cbrig.WS247 | Cbrig.WS247_Fam_275_10_1 | 1 | 10 | 0.000000 | GTGTGTGGGT          |

## C. brenneri

| Genome                                                                                                                                                         | Family name               | Number of sequences | Alignment length | Score    | Consensus without gaps                              |
|----------------------------------------------------------------------------------------------------------------------------------------------------------------|---------------------------|---------------------|------------------|----------|-----------------------------------------------------|
| Cbren.WS247                                                                                                                                                    | Cbren.WS247_Fam_1_10_97   | 97                  | 11               | 0.805295 | TaGAAGTTTC                                          |
| Cbren.WS247                                                                                                                                                    | Cbren.WS247_Fam_2_18_65   | 65                  | 18               | 0.935835 | AATTCCCATACCCAAAAT                                  |
| Cbren.WS247                                                                                                                                                    | Cbren.WS247_Fam_3_28_64   | 64                  | 39               | 0.524242 | ntTTTTGAAtTTTTGAATTCCCGCCAAA                        |
| Cbren.WS247                                                                                                                                                    | Cbren.WS247_Fam_4_15_62   | 62                  | 18               | 0.695169 | GGTCCCCGATTTTTc                                     |
| Cbren.WS247                                                                                                                                                    | Cbren.WS247_Fam_5_20_44   | 44                  | 26               | 0.552136 | tTTTTTgGGtCCTCgATTTt                                |
| Cbren.WS247                                                                                                                                                    | Cbren.WS247_Fam_6_20_42   | 42                  | 23               | 0.627161 | GGCCTAACTTTtcaAAATan                                |
| Cbren.WS247                                                                                                                                                    | Cbren.WS247_Fam_7_52_38   | 38                  | 55               | 0.764619 | TCCATTACCTGggtAAATGgCAGcAGGTAGCTATACGTTGccTtTcCCTAA |
| Cbren.WS247                                                                                                                                                    | Cbren.WS247_Fam_8_12_37   | 37                  | 12               | 0.700701 | GCttAGGCTtAG                                        |
| Cbren.WS247                                                                                                                                                    | Cbren.WS247_Fam_9_10_36   | 36                  | 14               | 0.600340 | GCCTTAGACA                                          |
| Cbren.WS247                                                                                                                                                    | Cbren.WS247_Fam_10_24_31  | 31                  | 32               | 0.634543 | AGGTCATGACCTAGAAAAAAAT                              |
| Cbren.WS247                                                                                                                                                    | Cbren.WS247_Fam_11_10_27  | 27                  | 11               | 0.707589 | CCGGTCTGGT                                          |
| Cbren.WS247                                                                                                                                                    | Cbren.WS247_Fam_12_20_26  | 26                  | 21               | 0.721074 | AAAAACACGGTCCCAattnt                                |
| Cbren.WS247                                                                                                                                                    | Cbren.WS247_Fam_13_30_25  | 25                  | 30               | 0.913185 | ATCGGGGACCgAAAATcGtGGCCCGAAAA                       |
| Cbren.WS247                                                                                                                                                    | Cbren.WS247_Fam_14_20_23  | 23                  | 27               | 0.459450 | CTTaGCCTCTACAAAnnnnc                                |
| Cbren.WS247                                                                                                                                                    | Cbren.WS247_Fam_15_16_22  | 22                  | 17               | 0.715559 | ATCTGGAcATcCGGAc                                    |
| Cbren.WS247                                                                                                                                                    | Cbren.WS247_Fam_16_15_20  | 20                  | 17               | 0.697110 | GAAACCgGACATTTc                                     |
| Cbren.WS247                                                                                                                                                    | Cbren.WS247_Fam_17_16_20  | 20                  | 17               | 0.714190 | TCTGtATGTCGTaTG                                     |
| Cbren.WS247                                                                                                                                                    | Cbren.WS247_Fam_18_161_18 | 18                  | 163              | 0.770988 |                                                     |
| TCCAACtTTAGAAAAATCgAATtTTTTTCAGTAgAnTCGAAAATcAAGattTTTTTgCATTGtCCTGGCGaCagCtaGaATcGTTtGaAcTgagCATATtaTGcATTGCcAGanTaaTTCTGACCATTTGACAtCAATttgAGtGtGCcCactCAGAT |                           |                     |                  |          |                                                     |
| Cbren.WS247                                                                                                                                                    | Cbren.WS247_Fam_19_174_17 | 17                  | 176              | 0.865948 |                                                     |
| AAAATCCAAAAATATGAcCttTTtTaTCTGATATTTTaGGATTTTGGTCTATTTCTGTCCGCCCTGAAAAAGTTTGAGCTTCTAATGGTCCAGActtGTGaTAATTTGTTTCAATACGTTGTAGTTCATCATTTtGTGCTGtaTCTCGATTGAAAAAT |                           |                     |                  |          |                                                     |
| taATTTTTTATGTCa                                                                                                                                                |                           |                     |                  |          |                                                     |
| Cbren.WS247                                                                                                                                                    | Cbren.WS247_Fam_20_15_17  | 17                  | 15               | 0.870588 | ATGTCCAGAGGGAA                                      |
| Cbren.WS247                                                                                                                                                    | Cbren.WS247_Fam_21_14_15  | 15                  | 14               | 0.916553 | GGAAGTCGGAAGtc                                      |
| Cbren.WS247                                                                                                                                                    | Cbren.WS247_Fam_22_169_14 | 14                  | 174              | 0.901899 |                                                     |
| AAACTATAAACCCACATTCCTGTTTGGCTGGCTGCTGTACTACAGTATATCTTGATTTTTGCATTCCCGGCTGCAACAGAAGAACAAGACGTTTGTGAGGGCTCGGATGGTGTAAaTTGCTTCAaAGACCGTGTGGAATCGTgATAaCcttTGTAGA  |                           |                     |                  |          |                                                     |
| CCGATATCG                                                                                                                                                      |                           |                     |                  |          |                                                     |
| Cbren.WS247                                                                                                                                                    | Cbren.WS247_Fam_23_10_14  | 14                  | 14               | 0.645474 | TCTCTCTCTC                                          |
| Cbren.WS247                                                                                                                                                    | Cbren.WS247_Fam_24_12_14  | 14                  | 13               | 0.656805 | AAGcgGAAGcGg                                        |
| Cbren.WS247                                                                                                                                                    | Cbren.WS247_Fam_25_12_14  | 14                  | 13               | 0.700197 | aCAGACAgACAg                                        |
| Cbren.WS247                                                                                                                                                    | Cbren.WS247_Fam_26_28_13  | 13                  | 32               | 0.631410 | TgTCCGGATGTCCatcTGTgTGTCTGTA                        |
| Cbren.WS247                                                                                                                                                    | Cbren.WS247_Fam_27_15_13  | 13                  | 15               | 0.811966 | GCAGCGTtcaAAAatc                                    |
| Cbren.WS247                                                                                                                                                    | Cbren.WS247_Fam_28_19_12  | 12                  | 24               | 0.494739 | TTTaGGCcGtTcGggCCGA                                 |
| Cbren.WS247                                                                                                                                                    | Cbren.WS247_Fam_29_20_11  | 11                  | 20               | 0.729091 | aTGGCCTAGAAAtcCAAAtg                                |
| Cbren.WS247                                                                                                                                                    | Cbren.WS247_Fam_30_16_11  | 11                  | 18               | 0.758249 | CTCTCAGGCTCTCAGG                                    |
| Cbren.WS247                                                                                                                                                    | Cbren.WS247_Fam_31_10_10  | 10                  | 10               | 0.760000 | GACcAgcCTA                                          |
| Cbren.WS247                                                                                                                                                    | Cbren.WS247_Fam_32_41_9   | 9                   | 41               | 0.904246 | AAGTAACCGTTGAAATTTTCTgggAACCCGGAAAAATTTCCa          |
| Cbren.WS247                                                                                                                                                    | Cbren.WS247_Fam_33_20_9   | 9                   | 22               | 0.650673 | AACTTcAGaAncTCCAGA                                  |
| Cbren.WS247                                                                                                                                                    | Cbren.WS247_Fam_34_19_9   | 9                   | 19               | 0.822612 | ATCGGCCcATttTgcCTAA                                 |
| Cbren.WS247                                                                                                                                                    | Cbren.WS247_Fam_35_17_9   | 9                   | 18               | 0.847737 | CTCATGTACTaCATTTA                                   |
| Cbren.WS247                                                                                                                                                    | Cbren.WS247_Fam_36_15_9   | 9                   | 17               | 0.572985 | CCGGaCCgGAcCAGg                                     |
| Cbren.WS247                                                                                                                                                    | Cbren.WS247_Fam_37_16_9   | 9                   | 16               | 0.763889 | CTGtCTaTCTGtCTaT                                    |
| Cbren.WS247                                                                                                                                                    | Cbren.WS247_Fam_38_169_8  | 8                   | 169              | 0.950690 |                                                     |
| GTTcCACCACAATATGAAAAGATGTAACACGGTGTtTTaACGCATTGGACACAATCCGAACCCtCATTAAcATCCCATTCTGATGATTCACTTGCAGATGCAAAAATCAAGAGAAATCAGTAGTGAGGCAGCGAGCAGAcGAAATGTCAAATAAAGT  |                           |                     |                  |          |                                                     |
| TtTGATATC                                                                                                                                                      |                           |                     |                  |          |                                                     |
| Cbren.WS247                                                                                                                                                    | Cbren.WS247_Fam_39_30_8   | 8                   | 30               | 0.888095 | ATACATCTGCATGTATTAggGAaGTCgCTA                      |
| Cbren.WS247                                                                                                                                                    | Cbren.WS247_Fam_40_29_8   | 8                   | 29               | 0.857553 | aACGCTGCGTTCAGCGTtcaAAAGTTTc                        |
| Cbren.WS247                                                                                                                                                    | Cbren.WS247_Fam_41_23_8   | 8                   | 24               | 0.644841 | TACAGTaATCCtAGAnnaAaAAC                             |



|                                                                                                                                                                   |                          |   |     |          |                                                                |
|-------------------------------------------------------------------------------------------------------------------------------------------------------------------|--------------------------|---|-----|----------|----------------------------------------------------------------|
| Cbren.WS247                                                                                                                                                       | Cbren.WS247_Fam_42_184_7 | 7 | 200 | 0.823492 |                                                                |
| GGCATCCAACCGGTCCGCACGTGTGCTCTTCcGGTCAAGGATCTCTGACAAGATAGATCCAGTGACcTTCCGAAGCACGTTGCCTGACAGATCGCGGTGGTTGGGCATCCaaAgTGTCTCATTTGCTGTgTGGTGTAGGCgCACctCAGACTATGAGCCTT |                          |   |     |          |                                                                |
| CGACTnaTcCCTCTtgGgtcAGTC                                                                                                                                          |                          |   |     |          |                                                                |
| Cbren.WS247                                                                                                                                                       | Cbren.WS247_Fam_43_165_7 | 7 | 168 | 0.858466 |                                                                |
| GAGTTTTTGAaattGGGAAGGGTTTGGATGGGAGTACTGTcTaaGAGCTgAtGTngAaATCAAGAACAACCAAGTCACATACGCCAAAAGGAGTGTTCCTACTCGATCCTGCCCTAGCTAACTGGATTATTCTTgGAAAAAGAAGCTCGAAAgA        |                          |   |     |          |                                                                |
| AGCTA                                                                                                                                                             |                          |   |     |          |                                                                |
| Cbren.WS247                                                                                                                                                       | Cbren.WS247_Fam_44_58_7  | 7 | 65  | 0.726252 | CAGAAaTaTTnGAAAAAGTGACCAAAAATATTTTGGTCATTTTTtTcCaTAAAAACCT     |
| Cbren.WS247                                                                                                                                                       | Cbren.WS247_Fam_45_41_7  | 7 | 41  | 0.947348 | AAGTCAGATAGGACTTTTTGTTCAGGAAGGCTTaTTGACCA                      |
| Cbren.WS247                                                                                                                                                       | Cbren.WS247_Fam_46_27_7  | 7 | 27  | 0.934156 | ACACACGCACTGTCGATtTTTAGGGG                                     |
| Cbren.WS247                                                                                                                                                       | Cbren.WS247_Fam_47_18_7  | 7 | 18  | 0.774250 | AAATTCcGAAAAtTcTGA                                             |
| Cbren.WS247                                                                                                                                                       | Cbren.WS247_Fam_48_16_7  | 7 | 16  | 0.861111 | AAATCTGGCCGAgAgg                                               |
| Cbren.WS247                                                                                                                                                       | Cbren.WS247_Fam_49_189_6 | 6 | 190 | 0.859123 |                                                                |
| ACGAAGTTGGTTGcTGGTTTTATTGAAAGGCTCTGTTTTCTAGGaCCGGAGTGTGATCAAAAAAGTAAAATATGGGAAATCCAAACGGTGGATTATCTTCTGATTGACCTGAAAaAcCTCtTGTCaAtTTCCCATTTCTGAATGGaTCCAAATTGaCTGT  |                          |   |     |          |                                                                |
| GTAATGCATCATAAATTCCTGACGAAACTG                                                                                                                                    |                          |   |     |          |                                                                |
| Cbren.WS247                                                                                                                                                       | Cbren.WS247_Fam_50_45_6  | 6 | 46  | 0.792271 | CATCGACCTcCACTTCTGATgCTCCAACcACcACAACCaAGaAAC                  |
| Cbren.WS247                                                                                                                                                       | Cbren.WS247_Fam_51_33_6  | 6 | 33  | 0.876094 | CAGCTGTTCGAcTGGtTTCTCCTCGACTGGAG                               |
| Cbren.WS247                                                                                                                                                       | Cbren.WS247_Fam_52_24_6  | 6 | 24  | 0.642593 | CATCcGGAcAgACAGACAtcngGA                                       |
| Cbren.WS247                                                                                                                                                       | Cbren.WS247_Fam_53_22_6  | 6 | 24  | 0.562500 | GaGCCaAAAaTTAGaGaTTTTTT                                        |
| Cbren.WS247                                                                                                                                                       | Cbren.WS247_Fam_54_21_6  | 6 | 23  | 0.617391 | TGaTGGCCTAGatTttgAAAA                                          |
| Cbren.WS247                                                                                                                                                       | Cbren.WS247_Fam_55_22_6  | 6 | 23  | 0.712077 | AGGCCATTTTTcAaGGtTTTCT                                         |
| Cbren.WS247                                                                                                                                                       | Cbren.WS247_Fam_56_21_6  | 6 | 21  | 0.915344 | ATACCATAGGTGGAAGATCCGG                                         |
| Cbren.WS247                                                                                                                                                       | Cbren.WS247_Fam_57_19_6  | 6 | 20  | 0.709444 | TAGCAGTTGATCacCCcAa                                            |
| Cbren.WS247                                                                                                                                                       | Cbren.WS247_Fam_58_16_6  | 6 | 19  | 0.607602 | cGGAAGCCcGGAAGCC                                               |
| Cbren.WS247                                                                                                                                                       | Cbren.WS247_Fam_59_18_6  | 6 | 18  | 0.871605 | GCCTcAgAAAAGATATCG                                             |
| Cbren.WS247                                                                                                                                                       | Cbren.WS247_Fam_60_15_6  | 6 | 15  | 0.718518 | aaTAGCAGTTgAGAc                                                |
| Cbren.WS247                                                                                                                                                       | Cbren.WS247_Fam_61_10_6  | 6 | 14  | 0.528571 | AAAAAAAtCG                                                     |
| Cbren.WS247                                                                                                                                                       | Cbren.WS247_Fam_62_62_5  | 5 | 62  | 0.873118 | ACGACTAGAGACcGAAAGTCTagAGCCTGTAGTCTGTAGcAAggnAaCCaAtATgAAGACCT |
| Cbren.WS247                                                                                                                                                       | Cbren.WS247_Fam_63_42_5  | 5 | 42  | 0.876190 | TTAGGCTTAGGCTTAGGTGaCaaCaaAaCTTAGGCTtCaaC                      |
| Cbren.WS247                                                                                                                                                       | Cbren.WS247_Fam_64_24_5  | 5 | 32  | 0.596875 | nncGTGGGAaATGCCAGAGGCA                                         |
| Cbren.WS247                                                                                                                                                       | Cbren.WS247_Fam_65_27_5  | 5 | 28  | 0.838095 | AaACCAGAntAGTTATAACATaGGGt                                     |
| Cbren.WS247                                                                                                                                                       | Cbren.WS247_Fam_66_20_5  | 5 | 24  | 0.591667 | aGCCAAAAATgggTTTTcaG                                           |
| Cbren.WS247                                                                                                                                                       | Cbren.WS247_Fam_67_19_5  | 5 | 19  | 0.845614 | GTGTCCTTTCAACAttTan                                            |
| Cbren.WS247                                                                                                                                                       | Cbren.WS247_Fam_68_11_5  | 5 | 11  | 0.903030 | TCGAtAAATTa                                                    |
| Cbren.WS247                                                                                                                                                       | Cbren.WS247_Fam_69_84_4  | 4 | 86  | 0.886305 |                                                                |
| GTTTTGTCTGGTCTTTGGCTaTaGATTGCTTGTcCaTCCcGtTGTCTCCcAGaGAACTACAGCTTATCCAACcCCCGGAGaGGTT                                                                             |                          |   |     |          |                                                                |
| Cbren.WS247                                                                                                                                                       | Cbren.WS247_Fam_70_75_4  | 4 | 75  | 0.925926 |                                                                |
| tCCACGATTGCGTTTCCAACGTaGACTTTTTaACTGATTcACcTCAGTTGAgAcTTTGCTGGAAaGGAGCGATCA                                                                                       |                          |   |     |          |                                                                |
| Cbren.WS247                                                                                                                                                       | Cbren.WS247_Fam_71_51_4  | 4 | 52  | 0.820513 | AAccGACGTAGCTTCCGAAGAAGCAGATcAGTCCTAaAgGGgtaAAGTtAT            |
| Cbren.WS247                                                                                                                                                       | Cbren.WS247_Fam_72_30_4  | 4 | 32  | 0.664062 | ccTAATACCTTTTTgGGTATcAgcgagtCt                                 |
| Cbren.WS247                                                                                                                                                       | Cbren.WS247_Fam_73_30_4  | 4 | 31  | 0.767921 | GTtCTTAGaTcAAATTTAGAgTAgTGA                                    |
| Cbren.WS247                                                                                                                                                       | Cbren.WS247_Fam_74_28_4  | 4 | 28  | 0.849206 | gGATGCTGTAGaATATCTgAaTaTCC                                     |
| Cbren.WS247                                                                                                                                                       | Cbren.WS247_Fam_75_27_4  | 4 | 27  | 0.818930 | GGACCaccGGAccACCAGGACcACCA                                     |
| Cbren.WS247                                                                                                                                                       | Cbren.WS247_Fam_76_25_4  | 4 | 26  | 0.655983 | TgGTCCGGtCcgAtCCgGtCtGgcC                                      |
| Cbren.WS247                                                                                                                                                       | Cbren.WS247_Fam_77_23_4  | 4 | 24  | 0.856481 | aAaCCATGACCTTTTTGTTTCTa                                        |
| Cbren.WS247                                                                                                                                                       | Cbren.WS247_Fam_78_21_4  | 4 | 23  | 0.589372 | TTAGGCTTAGGtgaccAcAcc                                          |
| Cbren.WS247                                                                                                                                                       | Cbren.WS247_Fam_79_19_4  | 4 | 22  | 0.622475 | acCCGGACcTaaAAAAAT                                             |
| Cbren.WS247                                                                                                                                                       | Cbren.WS247_Fam_80_21_4  | 4 | 21  | 0.669312 | tGGTGTcTGGCGCcAgAGggt                                          |
| Cbren.WS247                                                                                                                                                       | Cbren.WS247_Fam_81_20_4  | 4 | 21  | 0.701058 | GGTCcgaTCCGGcCTgGCcT                                           |
| Cbren.WS247                                                                                                                                                       | Cbren.WS247_Fam_82_20_4  | 4 | 20  | 0.844444 | tAGCATAGGGCCaAAATaTa                                           |
| Cbren.WS247                                                                                                                                                       | Cbren.WS247_Fam_83_18_4  | 4 | 19  | 0.769006 | TGGCGCTTAGgAtagATT                                             |
| Cbren.WS247                                                                                                                                                       | Cbren.WS247_Fam_84_14_4  | 4 | 18  | 0.708333 | TGTAGTTTGTAGTT                                                 |
| Cbren.WS247                                                                                                                                                       | Cbren.WS247_Fam_85_14_4  | 4 | 17  | 0.549020 | GCTACAGTAacCct                                                 |
| Cbren.WS247                                                                                                                                                       | Cbren.WS247_Fam_86_16_4  | 4 | 16  | 0.875000 | ACCATGAcCTTTtTtA                                               |
| Cbren.WS247                                                                                                                                                       | Cbren.WS247_Fam_87_11_4  | 4 | 11  | 1.000000 | ACTCATGGTGG                                                    |
| Cbren.WS247                                                                                                                                                       | Cbren.WS247_Fam_88_10_4  | 4 | 10  | 0.866667 | CGATTtGGgC                                                     |
| Cbren.WS247                                                                                                                                                       | Cbren.WS247_Fam_89_10_4  | 4 | 10  | 0.777778 | GaCaGTTtCA                                                     |

|                                                                                                                                                                 |                           |   |     |          |                                                                      |
|-----------------------------------------------------------------------------------------------------------------------------------------------------------------|---------------------------|---|-----|----------|----------------------------------------------------------------------|
| Cbren.WS247                                                                                                                                                     | Cbren.WS247_Fam_90_170_3  | 3 | 170 | 0.937255 |                                                                      |
| TCTCCAATCTTTTTCGTGAATTTTTTGTaTAcTCACTCacAAGACCATAATTTCTGCTCATACTACCTGTTTTCTCCTaTTTTTTGcTTTTggAGATGTTCCAGTATTTTCATGGGTGAAGTGTGGGAGaGCATTACTAACCATCATTTTCGACATTTT |                           |   |     |          |                                                                      |
| CGAATGAaAt                                                                                                                                                      |                           |   |     |          |                                                                      |
| Cbren.WS247                                                                                                                                                     | Cbren.WS247_Fam_91_160_3  | 3 | 160 | 0.955556 |                                                                      |
| ATGGACaTCGGCTCTATTccTTCTAGGACATTAaAGAGCATAATTTTCCAAGTCgcAATCCAAAATTTTCATGAACCTACGTGCAGTTTCAGcATCGGCCGAAACGAATTTGTCTGTAAcAGaCGTCAAACCAACTGAGAAAATTCAAATATTGAAAAC |                           |   |     |          |                                                                      |
| Cbren.WS247                                                                                                                                                     | Cbren.WS247_Fam_92_144_3  | 3 | 148 | 0.713964 |                                                                      |
| tcCatAanTcAAAAatcAAAAatTcTcAaaACCTGGTCATGATTATACTTTTTGAAcCGTTCGAAaTGCTGAaTCAAAGATACCaaTTTcAtaATTTTtagGTTCAAACCTagCcGaAAaACGTngAAAAtTcGaaTTTTaAt                 |                           |   |     |          |                                                                      |
| Cbren.WS247                                                                                                                                                     | Cbren.WS247_Fam_93_77_3   | 3 | 77  | 0.763348 |                                                                      |
| AAGCCAAAAGTAGAAcCTGGAAGAAgCAACCGcgnngggggGGgGGGTGGTCACcTTTCTcGatTTACTCTCGACCG                                                                                   |                           |   |     |          |                                                                      |
| Cbren.WS247                                                                                                                                                     | Cbren.WS247_Fam_94_69_3   | 3 | 70  | 0.785714 | CCTCTACAAAATgcCTGCCGccctGcGCgACAGTTTGTAGAGGcTAAgGCTACAAACTACAAAccTTG |
| Cbren.WS247                                                                                                                                                     | Cbren.WS247_Fam_95_36_3   | 3 | 36  | 0.888889 | GACTCGGTcGAGGTGGATTCCGTTGATGTaCTGGTn                                 |
| Cbren.WS247                                                                                                                                                     | Cbren.WS247_Fam_96_32_3   | 3 | 32  | 0.888889 | ATAGCAGTTGaTCCaTAGCAGAAgAGCCAAAt                                     |
| Cbren.WS247                                                                                                                                                     | Cbren.WS247_Fam_97_29_3   | 3 | 30  | 0.855556 | GACATTGgCCcTGAATTCAAATAGAAAtt                                        |
| Cbren.WS247                                                                                                                                                     | Cbren.WS247_Fam_98_30_3   | 3 | 30  | 0.881481 | AAaTCTATGCGCTTTAGAacCACAAACtCA                                       |
| Cbren.WS247                                                                                                                                                     | Cbren.WS247_Fam_99_27_3   | 3 | 27  | 0.934156 | AaAGACTACAAAgACTACAAAGACTAC                                          |
| Cbren.WS247                                                                                                                                                     | Cbren.WS247_Fam_100_27_3  | 3 | 27  | 0.868313 | AAAATTCtGaAAATTCtGaAAATTCcG                                          |
| Cbren.WS247                                                                                                                                                     | Cbren.WS247_Fam_101_22_3  | 3 | 23  | 0.753623 | TGTAGCTACAtGnaGAGgGAAA                                               |
| Cbren.WS247                                                                                                                                                     | Cbren.WS247_Fam_102_23_3  | 3 | 23  | 0.806763 | ATTGGgCAACTTaCCTAGcTcaG                                              |
| Cbren.WS247                                                                                                                                                     | Cbren.WS247_Fam_103_22_3  | 3 | 22  | 0.737374 | AcCtGTCCTGgAGAGGacACCa                                               |
| Cbren.WS247                                                                                                                                                     | Cbren.WS247_Fam_104_21_3  | 3 | 22  | 0.727273 | AGCCTGAagGGCCTcAgTgCC                                                |
| Cbren.WS247                                                                                                                                                     | Cbren.WS247_Fam_105_20_3  | 3 | 20  | 0.600000 | GTcTGTctgTctgTgTacCT                                                 |
| Cbren.WS247                                                                                                                                                     | Cbren.WS247_Fam_106_20_3  | 3 | 20  | 0.711111 | GGCAanTTGCCaGagAAAc                                                  |
| Cbren.WS247                                                                                                                                                     | Cbren.WS247_Fam_107_20_3  | 3 | 20  | 0.755556 | AAGCcGCTTcTAgAtGnTCT                                                 |
| Cbren.WS247                                                                                                                                                     | Cbren.WS247_Fam_108_20_3  | 3 | 20  | 0.733333 | AcAAATTTcaGATtTGaggC                                                 |
| Cbren.WS247                                                                                                                                                     | Cbren.WS247_Fam_109_16_3  | 3 | 16  | 1.000000 | GTAGTGACGTAGGGAC                                                     |
| Cbren.WS247                                                                                                                                                     | Cbren.WS247_Fam_110_16_3  | 3 | 16  | 0.777778 | TTCTATTTcGacaCAG                                                     |
| Cbren.WS247                                                                                                                                                     | Cbren.WS247_Fam_111_15_3  | 3 | 15  | 0.644444 | TtcTaaTtCGGCCcGg                                                     |
| Cbren.WS247                                                                                                                                                     | Cbren.WS247_Fam_112_14_3  | 3 | 14  | 0.873016 | ATCGGAAtTGGTgA                                                       |
| Cbren.WS247                                                                                                                                                     | Cbren.WS247_Fam_113_11_3  | 3 | 11  | 0.838384 | AAATCGTCTAt                                                          |
| Cbren.WS247                                                                                                                                                     | Cbren.WS247_Fam_114_199_2 | 2 | 199 | 0.789782 |                                                                      |
| CAGAGATCAGTATGGTcaAATCaAACAAcATaAAACaAaGaaATCAAATTAaAATAgaaGAGaGTGAGAcATaCgaATGGATTTCaCTaGAACTTGcaGGcAATTTTAAaAAGAAACTCTATcCATCTGTaTgTCcAAaAGACCcCTGAAACCGTcG   |                           |   |     |          |                                                                      |
| AATGGACCTCCGAAGaAGCGCAGAcCCCCGAAGGaaAag                                                                                                                         |                           |   |     |          |                                                                      |
| Cbren.WS247                                                                                                                                                     | Cbren.WS247_Fam_115_192_2 | 2 | 192 | 0.618056 |                                                                      |
| TTGTCACTAATAAAATGcTaaGtAgTaAaaTTGTActCAaTTTGTcAGTTGATCaTTTTTcTGTATCTaTcAaGGAAACcGAGATaTaGaaCATCAATcCTTCCgTaTCGCTaTccaggCaGCAAGTGCCTCTGcTgctTTTcTgTtCAGAcGcTc    |                           |   |     |          |                                                                      |
| aTATCTCaaTcAGGAAaaACGACATCaaAAAG                                                                                                                                |                           |   |     |          |                                                                      |
| Cbren.WS247                                                                                                                                                     | Cbren.WS247_Fam_116_174_2 | 2 | 174 | 0.674330 |                                                                      |
| cTTCGAcTGTgTcTcCgCTCATGCTATATAGACCTGGACATCAAtGaGAGcATTcGtaacCAGCCCCtGtTaaGAACTccgGTTCTcGcCCGTTGGcGGTTTATTTCTCGTTcAGATGaATCacAAAGaagaTaTgCTTcAC                  |                           |   |     |          |                                                                      |
| TGTcTGATcTCgAa                                                                                                                                                  |                           |   |     |          |                                                                      |
| Cbren.WS247                                                                                                                                                     | Cbren.WS247_Fam_117_134_2 | 2 | 134 | 0.900497 |                                                                      |
| TTTTTGCTTTTTTCTTTTcGCAGAAAATGATTCAAAAGTGTTCcTatgTGTcccAtaGCTCAGTGGTAAAAGcATTGGCAATTaTTTGAACCTAACAGTCGCAAGTTCAAACCcCACCGGTGGCAAATCT                              |                           |   |     |          |                                                                      |
| Cbren.WS247                                                                                                                                                     | Cbren.WS247_Fam_118_128_2 | 2 | 128 | 0.787760 |                                                                      |
| ATAGTCGCGGAGCGCCTGGAGCATTCaTcCGAcTaATAcTcGAACCTCATCCGGcCTCGCGGCTATGACAcTaAGCaTAGgTGGACCATcCAAGaAATAGGATCCAAcAcGaTaaGTgTg                                        |                           |   |     |          |                                                                      |
| Cbren.WS247                                                                                                                                                     | Cbren.WS247_Fam_119_121_2 | 2 | 121 | 0.867769 |                                                                      |
| TATAGCCGATTTcAGTTAACTATCCGATCATTTCTCGCTACTcCAAcTTATTcTaaAAAaTGAATCATgGCAGCACaCTaCAGGTTGTATaTaGGAAAATTTACCCGTTaTTTAAGAATTT                                       |                           |   |     |          |                                                                      |
| Cbren.WS247                                                                                                                                                     | Cbren.WS247_Fam_120_104_2 | 2 | 104 | 0.963141 |                                                                      |
| tTTGGATGCCCAACCACCGCATCTGTcAGGCAACGTGCTTCGGAAGGTCACTGGATCTATCTGTGTCAGAGATCCTTGAcCGAAAGAGCACAcGTGCGGACCGG                                                        |                           |   |     |          |                                                                      |
| Cbren.WS247                                                                                                                                                     | Cbren.WS247_Fam_121_95_2  | 2 | 95  | 0.663158 |                                                                      |
| ATTGATCAACTGaCTCCAaTtaCTGAACaAgTCAaacaGGaaGcGAgACATCCaaCaTGTTGAaGAgATaCcaAAcAACTTCAAGCCAaGATaTG                                                                 |                           |   |     |          |                                                                      |
| Cbren.WS247                                                                                                                                                     | Cbren.WS247_Fam_122_90_2  | 2 | 90  | 0.888889 |                                                                      |
| TGCTTCCAGCGTGTGAGCTTgGGGGAAaGtgTAGTCAGTTGGCTCCCGGATTTTACTAAGCCTaTTTCTTAAAGGGTGTATCCcCa                                                                          |                           |   |     |          |                                                                      |
| Cbren.WS247                                                                                                                                                     | Cbren.WS247_Fam_123_87_2  | 2 | 87  | 0.931035 |                                                                      |
| GCCAGAAAAAACAACCTGTGGAGGGGaGgGGaTAGTTGTACTTTTCTaGAGACTTTTTTCGATCGAAATACATCAATCTAGAGTCCGA                                                                        |                           |   |     |          |                                                                      |
| Cbren.WS247                                                                                                                                                     | Cbren.WS247_Fam_124_65_2  | 2 | 65  | 0.753846 | AGTCGAGCTATaCTcTACCCCGcCTgCaCGCGAAGTGGTaaACCCCCgaGGTTCGAACcCaCa      |
| Cbren.WS247                                                                                                                                                     | Cbren.WS247_Fam_125_54_2  | 2 | 54  | 0.901235 | TTCaGCTCAGTgTgTGGTCCCTCCGaTGTGTGCTGGGACGGTAGACGTC                    |
| Cbren.WS247                                                                                                                                                     | Cbren.WS247_Fam_126_45_2  | 2 | 45  | 0.659259 | GCATAAGGCgAcGcCTaAAaTTaaGAcGGGACTTTtagGACAcTc                        |
| Cbren.WS247                                                                                                                                                     | Cbren.WS247_Fam_127_39_2  | 2 | 39  | 1.000000 | TCTGTCTCTTAAAGGATCTGACTACTTTAGAATTTTG                                |
| Cbren.WS247                                                                                                                                                     | Cbren.WS247_Fam_128_36_2  | 2 | 36  | 0.629630 | GGAcaacCaGGAcCACCAGACCcCaAGGAGacGaC                                  |

|             |                          |   |    |          |                                   |
|-------------|--------------------------|---|----|----------|-----------------------------------|
| Cbren.WS247 | Cbren.WS247_Fam_129_32_2 | 2 | 32 | 0.833333 | GCACTTgCAGATgTcAAGaTTATCAATAGAGC  |
| Cbren.WS247 | Cbren.WS247_Fam_130_32_2 | 2 | 32 | 0.958333 | AAAACGaTTTTCCAGGAAAATCATTTTTCTCGG |
| Cbren.WS247 | Cbren.WS247_Fam_131_31_2 | 2 | 31 | 0.811828 | aGACTACAAACTACAAAACTGAGaCTaaGA    |
| Cbren.WS247 | Cbren.WS247_Fam_132_30_2 | 2 | 30 | 0.622222 | GCCaATTTaAGCCgAacgTatTTCaATTcGG   |
| Cbren.WS247 | Cbren.WS247_Fam_133_30_2 | 2 | 30 | 0.600000 | TTGTTGGaACcGTcGTaGTTTcAacgGTaG    |
| Cbren.WS247 | Cbren.WS247_Fam_134_30_2 | 2 | 30 | 0.733333 | CCTGCaCCAGCaCCAGCaGCaGaaGAGACa    |
| Cbren.WS247 | Cbren.WS247_Fam_135_29_2 | 2 | 29 | 0.862069 | AGAGTCACCAGAGTCACCcCaGAGTCaGt     |
| Cbren.WS247 | Cbren.WS247_Fam_136_29_2 | 2 | 29 | 0.770115 | CGGGCCAATTcGGGCCATTTTaaCCAAc      |
| Cbren.WS247 | Cbren.WS247_Fam_137_29_2 | 2 | 29 | 0.724138 | TTTCTAGGCCAcCaAATCAAAaAaTTTgaG    |
| Cbren.WS247 | Cbren.WS247_Fam_138_28_2 | 2 | 28 | 0.761905 | TTGCgCGTAAcTtaCGAAATaTTgGAAT      |
| Cbren.WS247 | Cbren.WS247_Fam_139_27_2 | 2 | 27 | 0.802469 | CTTCCGGCCCTTcGGGCcTTCcGcGC        |
| Cbren.WS247 | Cbren.WS247_Fam_140_26_2 | 2 | 26 | 0.602564 | AcCTACAGTAATCCTaAcTgTaGGtg        |
| Cbren.WS247 | Cbren.WS247_Fam_141_25_2 | 2 | 25 | 0.633333 | CCGGATGTCCAgGaATCcGaATgTc         |
| Cbren.WS247 | Cbren.WS247_Fam_142_24_2 | 2 | 24 | 0.618056 | GGCAAcTTGCCGaaGGTcTaGaTg          |
| Cbren.WS247 | Cbren.WS247_Fam_143_24_2 | 2 | 24 | 1.000000 | CTTGGCTTcAGTTTcAGCCTTGGT          |
| Cbren.WS247 | Cbren.WS247_Fam_144_24_2 | 2 | 24 | 0.777778 | TCCTTCTTGCCCTTggCaTCAGCc          |
| Cbren.WS247 | Cbren.WS247_Fam_145_24_2 | 2 | 24 | 0.722222 | CATAcATCCTaTTTTCaGTccTGC          |
| Cbren.WS247 | Cbren.WS247_Fam_146_24_2 | 2 | 24 | 1.000000 | CACCGGACTTACAGCCGTACTTAC          |
| Cbren.WS247 | Cbren.WS247_Fam_147_24_2 | 2 | 24 | 0.944444 | TACACACTTTTTATTCAaGAGGAC          |
| Cbren.WS247 | Cbren.WS247_Fam_148_23_2 | 2 | 23 | 0.652174 | AAAATCtgGaaTTTTTCgGTaTG           |
| Cbren.WS247 | Cbren.WS247_Fam_149_23_2 | 2 | 23 | 0.884058 | AAGCCTAAAAAGGCCCTAGTcTcAC         |
| Cbren.WS247 | Cbren.WS247_Fam_150_23_2 | 2 | 23 | 1.000000 | GCGTACGATGCTCAACAACGAC            |
| Cbren.WS247 | Cbren.WS247_Fam_151_22_2 | 2 | 22 | 0.613636 | GTTCtAgGGCaTTTcTAGAGCT            |
| Cbren.WS247 | Cbren.WS247_Fam_152_22_2 | 2 | 22 | 0.666667 | TTaGCGTcAAAaCtCaCCTATT            |
| Cbren.WS247 | Cbren.WS247_Fam_153_21_2 | 2 | 21 | 0.619048 | AAtAcTATGAGttaTTCCGA              |
| Cbren.WS247 | Cbren.WS247_Fam_154_21_2 | 2 | 21 | 0.650794 | GaTaTGAGcCTCAGGCTTaCa             |
| Cbren.WS247 | Cbren.WS247_Fam_155_21_2 | 2 | 21 | 0.746032 | GTAGATCAAAACaTAgGCTaG             |
| Cbren.WS247 | Cbren.WS247_Fam_156_21_2 | 2 | 21 | 0.658730 | GGaGcAAAAATaGaaTTTcC              |
| Cbren.WS247 | Cbren.WS247_Fam_157_21_2 | 2 | 21 | 0.619048 | gAaGCTGaTCTaAGGCTGgCT             |
| Cbren.WS247 | Cbren.WS247_Fam_158_21_2 | 2 | 21 | 0.809524 | TCAACTGCTATAGcTGTTGca             |
| Cbren.WS247 | Cbren.WS247_Fam_159_21_2 | 2 | 21 | 0.873016 | GCCCCCACCATCCAaATCa               |
| Cbren.WS247 | Cbren.WS247_Fam_160_21_2 | 2 | 21 | 0.873016 | AAAAATGAACGGGTcAAAaAA             |
| Cbren.WS247 | Cbren.WS247_Fam_161_21_2 | 2 | 21 | 0.619048 | TAAAaAGGATAAAaGcGaGa              |
| Cbren.WS247 | Cbren.WS247_Fam_162_21_2 | 2 | 21 | 0.619048 | GGACTAGaaTTcCaGAacGAT             |
| Cbren.WS247 | Cbren.WS247_Fam_163_20_2 | 2 | 20 | 0.633333 | GGCCcaAAACGGcCTgTaaC              |
| Cbren.WS247 | Cbren.WS247_Fam_164_20_2 | 2 | 20 | 0.800000 | TCaACTGCTATTCCtTAGAC              |
| Cbren.WS247 | Cbren.WS247_Fam_165_20_2 | 2 | 20 | 0.666667 | CCAAaTGaGcCGATTcTGaA              |
| Cbren.WS247 | Cbren.WS247_Fam_166_20_2 | 2 | 20 | 0.666667 | CTCAacTaCTaTaTTTTTgA              |
| Cbren.WS247 | Cbren.WS247_Fam_167_20_2 | 2 | 20 | 0.933333 | GCCTGACAGACCTGAGcACA              |
| Cbren.WS247 | Cbren.WS247_Fam_168_20_2 | 2 | 20 | 1.000000 | GCTCACTGCCGCCCGTTGC               |
| Cbren.WS247 | Cbren.WS247_Fam_169_20_2 | 2 | 20 | 1.000000 | ATGACCGAGTGTTCGACCGA              |
| Cbren.WS247 | Cbren.WS247_Fam_170_20_2 | 2 | 20 | 0.866667 | TTCTTGATaAaAcCACAGG               |
| Cbren.WS247 | Cbren.WS247_Fam_171_19_2 | 2 | 19 | 0.666667 | TGTcAATTTcTcCATCTag               |
| Cbren.WS247 | Cbren.WS247_Fam_172_19_2 | 2 | 19 | 0.649123 | TTTCaAGcCCAGATaTGaa               |
| Cbren.WS247 | Cbren.WS247_Fam_173_18_2 | 2 | 18 | 0.666667 | TaGGCTTgaAGGgAGCCT                |
| Cbren.WS247 | Cbren.WS247_Fam_174_18_2 | 2 | 18 | 1.000000 | ATGCCACACCATCAATGG                |
| Cbren.WS247 | Cbren.WS247_Fam_175_18_2 | 2 | 18 | 0.703704 | ATACTaCTcCgGcACCAA                |
| Cbren.WS247 | Cbren.WS247_Fam_176_18_2 | 2 | 18 | 0.777778 | AGGCTAGTCAGGcTaaTC                |
| Cbren.WS247 | Cbren.WS247_Fam_177_17_2 | 2 | 17 | 0.921569 | ATTGACAAAGTTGGGTa                 |
| Cbren.WS247 | Cbren.WS247_Fam_178_16_2 | 2 | 16 | 0.635417 | TCCGgtTATGaAaAcGa                 |
| Cbren.WS247 | Cbren.WS247_Fam_179_16_2 | 2 | 16 | 0.750000 | CCcCAGGACCCcAGaA                  |
| Cbren.WS247 | Cbren.WS247_Fam_180_14_2 | 2 | 14 | 0.690476 | ctCGCAAcTCGCAA                    |
| Cbren.WS247 | Cbren.WS247_Fam_181_14_2 | 2 | 14 | 0.809524 | TCaATAaTCAATAA                    |
| Cbren.WS247 | Cbren.WS247_Fam_182_13_2 | 2 | 13 | 0.692308 | TaaAAGTTAAAcG                     |
| Cbren.WS247 | Cbren.WS247_Fam_183_12_2 | 2 | 12 | 0.833333 | TgTTTTGACCGAG                     |
| Cbren.WS247 | Cbren.WS247_Fam_184_12_2 | 2 | 12 | 0.611111 | aCATTTTCgCaA                      |
| Cbren.WS247 | Cbren.WS247_Fam_185_12_2 | 2 | 12 | 0.777778 | TAGGTaTAGGTa                      |

|                                                                                                                                                                     |                           |   |     |          |             |
|---------------------------------------------------------------------------------------------------------------------------------------------------------------------|---------------------------|---|-----|----------|-------------|
| Cbren.WS247                                                                                                                                                         | Cbren.WS247_Fam_186_11_2  | 2 | 11  | 0.757576 | CaTcGCCTAAC |
| Cbren.WS247                                                                                                                                                         | Cbren.WS247_Fam_187_11_2  | 2 | 11  | 0.636364 | AAAaAGGCcCa |
| Cbren.WS247                                                                                                                                                         | Cbren.WS247_Fam_188_10_2  | 2 | 10  | 0.733333 | CTTcCACGGc  |
| Cbren.WS247                                                                                                                                                         | Cbren.WS247_Fam_189_10_2  | 2 | 10  | 0.600000 | CCcCGGaAaA  |
| Cbren.WS247                                                                                                                                                         | Cbren.WS247_Fam_190_10_2  | 2 | 10  | 1.000000 | TTTTTGAAAT  |
| Cbren.WS247                                                                                                                                                         | Cbren.WS247_Fam_191_231_1 | 1 | 231 | 0.000000 |             |
| ACACACCGTGCTGAAACCTTCAAGATGTTCCACTTTCTCATTCTGTCCACATCTTATCCATCTGAATTCAGCTACGAGAACTGCCAGAGCACGTTGTTCCAGTTGTTGTGGAGGAAACCGAGAAGAAGGATGAGCCATCATTGAAATCCAAGATTACCG     |                           |   |     |          |             |
| GACTCTTCAAGAAGTCATCTGCTCATGCTGACTATCCAATCTCTGAACAATACGATGGACCATTGGAATCA                                                                                             |                           |   |     |          |             |
| Cbren.WS247                                                                                                                                                         | Cbren.WS247_Fam_192_218_1 | 1 | 218 | 0.000000 |             |
| GGACTTGAATCAGGGAAATTATGATTTAGTTTGTAGAAGCTTCTCAATTTTAAACAGAATGATCAGATCAAATGATTCGTATAGACAGTGCATGTAAGACGCTGGTTCGTTGCTCAAAAAGCCCCGCCCCCGTCCGGGAAGAGACAGAATTCACATACA     |                           |   |     |          |             |
| ACTGACTAATAAACCGCTCAATACAGACCGCCCATTTAAAATTATAAAAGGATGAAAG                                                                                                          |                           |   |     |          |             |
| Cbren.WS247                                                                                                                                                         | Cbren.WS247_Fam_193_180_1 | 1 | 180 | 0.000000 |             |
| TTTTTCTTAAATGAAGCAATCGCTAAGATAATTCCGGGATATTTCCCCAGTGGCTGTAGTGTCAAAAAACATAATTTGAGCCCTGAGAAATGCCTAGTTAGGGCTGTGCAGCCAGGAATGCAAAAACGAAATCCCAGTAGAAGTGGGATATAGGGT        |                           |   |     |          |             |
| AAAATTTTGATGAATCACAA                                                                                                                                                |                           |   |     |          |             |
| Cbren.WS247                                                                                                                                                         | Cbren.WS247_Fam_194_176_1 | 1 | 176 | 0.000000 |             |
| TATAAACCTGCCCTCATACCTAAAATTTGGCGGATTGGCAATAAGAATTGTATGTTTTACTATCGGCATAATTATTACAACGATTTGACTAAGTTTCAGAAAACCTCAGCAAAGAATTGGAAAATTTTTGGTTTAGGAGGCGACATTTTTGTGCGAAA      |                           |   |     |          |             |
| ATTGGACAAATGTGAA                                                                                                                                                    |                           |   |     |          |             |
| Cbren.WS247                                                                                                                                                         | Cbren.WS247_Fam_195_172_1 | 1 | 172 | 0.000000 |             |
| GCTATCTCACAGGTAATAATCAATTTTTATGCATATAAGTTGCCATTCCAACAGCTCGTCTGCCAAGGAATTCCTACAATCCGCCTCAGAATAGTTTCAAGAACCCTCAAAAAGCCAAAAGTGATGGTCACGGAATGGCGATTCCGAGTGTTCATGT       |                           |   |     |          |             |
| TAAATAAAAACAG                                                                                                                                                       |                           |   |     |          |             |
| Cbren.WS247                                                                                                                                                         | Cbren.WS247_Fam_196_171_1 | 1 | 171 | 0.000000 |             |
| AGAGCGAGATTTGTGAGAAAATCCGAGAAAATGAGCCTTCGAAAACAGTATACCTGATTTTTGAGAAAATTTGCAAAAACCTGAATTTGTTTCGTTCAATATAGTTTAAATCGGTATTGATCTGTTTCGATAACGCTAACGTTGGCTTCTCCGATCGTGTTC  |                           |   |     |          |             |
| GAACTGAATCG                                                                                                                                                         |                           |   |     |          |             |
| Cbren.WS247                                                                                                                                                         | Cbren.WS247_Fam_197_170_1 | 1 | 170 | 0.000000 |             |
| TGAAACTGAACAAATGATTTGATACTAGGAGCAGAACAAAGATCTCAATAACAATACTATTTCAAAAACCTCCAAAATTTAGAAATTTAGACCCTAAAATGACCCAGCTCTGAGCATTCAACATCTTTCAACGCATTGTCCAACAGTGTACTTGGAG       |                           |   |     |          |             |
| CTTGAAATGC                                                                                                                                                          |                           |   |     |          |             |
| Cbren.WS247                                                                                                                                                         | Cbren.WS247_Fam_198_168_1 | 1 | 168 | 0.000000 |             |
| GTACTCTCACTTCTTGAAGTCGTCAAAATAACATCCAGAACTGAACAGTTGCTCTAAATGTTTGGTAATCACCTGATTTCTCTCAACAAAGCCGTATCAGAACGGCATCGTGTGGTTTTCCAAGAAAAGTTCTTGAGGTGTATATTTACTGATGATCC      |                           |   |     |          |             |
| TCCCTCAA                                                                                                                                                            |                           |   |     |          |             |
| Cbren.WS247                                                                                                                                                         | Cbren.WS247_Fam_199_163_1 | 1 | 163 | 0.000000 |             |
| TAGCATGAGCGGAAGGGACAATCAGAGATTAACGAATACTGAAACACATCTTCTTTGTGATTGATGAAGCTGTTAGCACTCGAACGAAAATAGACCCCCACCGTATATGACCGAAGTCAAAGGAAGTGATACGAATATTCTCTTCTTGTTCGAGTCT       |                           |   |     |          |             |
| TTA                                                                                                                                                                 |                           |   |     |          |             |
| Cbren.WS247                                                                                                                                                         | Cbren.WS247_Fam_200_162_1 | 1 | 162 | 0.000000 |             |
| TTTCGCTCATGAAAACATAAATGGTCCCGTATCGGCTGGAATTTTCATCTGAATTTATGTTTTGGGGTGGTTGTGCGCTTCTGATAAGCAACTAATATATTTCCGGCTAAAATCTAACATTGTCATTTTCAGAAAAAGTTTTGAACCGTCCATCAAT       |                           |   |     |          |             |
| AT                                                                                                                                                                  |                           |   |     |          |             |
| Cbren.WS247                                                                                                                                                         | Cbren.WS247_Fam_201_162_1 | 1 | 162 | 0.000000 |             |
| CCATCAATGCCCCGAAAATCGAATCGAAAATTCAAAGTATTTGAACATTTTTCGAATTTTCTGGAAATCTGAAAAAACTGATATGGCTGAAACTTGAATCAATGTCACTAGAACTTATTACACTGATACTTAATACAACATTTTTGAGTGGATACAA       |                           |   |     |          |             |
| AG                                                                                                                                                                  |                           |   |     |          |             |
| Cbren.WS247                                                                                                                                                         | Cbren.WS247_Fam_202_160_1 | 1 | 160 | 0.000000 |             |
| TCTAACAGCTTCCATGAATCACAATCTCTGTGCTTCACTATTCGGTGTGCATCCTTCGAATGTTCCCTCCGCTCATGCTAAATAGACCTGGATATAAGAGTATTCGTTACTGCCTCATTTGTGATCGGGCACGGGTTAGATGGTTTACTCTTGTCCGGGC    |                           |   |     |          |             |
| Cbren.WS247                                                                                                                                                         | Cbren.WS247_Fam_203_160_1 | 1 | 160 | 0.000000 |             |
| TAGTATGTTCACTTACAATTCGAAGATGCAAAATCGAGGTTCAAAAAGTTTCTCCGTTTTCTTGTGATTTACAAAATGTTGAACCTGATCATGACTAAAAATACGTATAGACTGAAAGATTTTCTCTGAAAGCTCAAAGAAAACGTAGTTTTAGACACATTTA |                           |   |     |          |             |
| Cbren.WS247                                                                                                                                                         | Cbren.WS247_Fam_204_151_1 | 1 | 151 | 0.000000 |             |
| GTGATGGTCCAGTAGGAGAAAAGTGTCTTCTCTTCAATCGAACTGTTTTTTGATCTACTGAGAAGAGAAACGAAAAGGTTGGACGAGAGGAAGAGTATAAAAATGGAAAGTTTGACCGGAAACAGAAAAAAAATCAATAAAAAGAG                  |                           |   |     |          |             |
| Cbren.WS247                                                                                                                                                         | Cbren.WS247_Fam_205_150_1 | 1 | 150 | 0.000000 |             |
| ATCTACAGTAACCCAAAAACCAAAAATCTTTGAAAGCTGCAGAGATTCTCAAAATTTGATACATCTAAAAATCGAGGATTTTCATGTTTCGTTAGTTTTCATATAGATCACAACAAAAATCTAAAAGATAGGACCTAAACGAGCTATCTGTCT           |                           |   |     |          |             |
| Cbren.WS247                                                                                                                                                         | Cbren.WS247_Fam_206_146_1 | 1 | 146 | 0.000000 |             |
| AAAAAATTTCTAATTTTTTGTGCAAGGATAGCAAAATGTGCTGAGGAGCTTAGAACGAAAAAATTTTTTGAAAAATCTGTCTCTGAACCTATTATAAGGCATCTCTATTAGAAAGGCACCCACCGGTTTCAGACCGCCCCC                       |                           |   |     |          |             |
| Cbren.WS247                                                                                                                                                         | Cbren.WS247_Fam_207_144_1 | 1 | 144 | 0.000000 |             |
| GGGTCTCGCCACGAAAATCTAAAAACTGTCATCTCAGTCAGTTTTGGTCAGATTTAGATAAAAACAGTACCGTTGGAGTTAGGCTGAAGAGACGCTTCGAATGAGTATAACGATGACTAGGTTTTGACATATTTATATTTTTCT                    |                           |   |     |          |             |
| Cbren.WS247                                                                                                                                                         | Cbren.WS247_Fam_208_143_1 | 1 | 143 | 0.000000 |             |
| GGGTTACGGTAGTTTTGTGATTTCTGTGACGGACCCAAAAATTAAAAAATTCAAAACCCGACCTTGTGGGTAGTTTTCTGTGCCGCTTACGTTGCTGATTTCAAAATCTATCAAACTATCGAGATCGAGTGAATTTGATC                        |                           |   |     |          |             |
| Cbren.WS247                                                                                                                                                         | Cbren.WS247_Fam_209_140_1 | 1 | 140 | 0.000000 |             |
| TGAGAAGATGTTGGATACGGAACAAACAGTGCATTTTCAGGTCGACAATGCGGAAATCTCTCAAATTTCCATGTTTTCTCTCAGTAGACCATTAACCTGCGCTCAATGTTTTCTCTTGTTCACCTAGAGAACGCAT                            |                           |   |     |          |             |
| Cbren.WS247                                                                                                                                                         | Cbren.WS247_Fam_210_138_1 | 1 | 138 | 0.000000 |             |
| GTCAGAAAAGTACCCACAAGACGAGGTTTCAAAATGATCTGTTATAATCACTCATTTTTGTGACTTCAATAATATTTATGGAATTCAAAAAACCATGTCTTGTAGGTTATCATAGAACCGTATCGACGTGCCGT                              |                           |   |     |          |             |

|                                                                                                                                          |                           |   |     |          |                                                                         |
|------------------------------------------------------------------------------------------------------------------------------------------|---------------------------|---|-----|----------|-------------------------------------------------------------------------|
| Cbren.WS247                                                                                                                              | Cbren.WS247_Fam_211_138_1 | 1 | 138 | 0.000000 |                                                                         |
| CTAGGCCACGGCCGCGAAAAGTTAGGCCACCAATCTTCGAAATTGCACAGTTTGGGTGAAAATTGGGCTGGCGACTCGATTTTTGAACAGTTTCGGCCGGTTTGACCTGGGCTTTCAGGAAAAACAACATGGAATT |                           |   |     |          |                                                                         |
| Cbren.WS247                                                                                                                              | Cbren.WS247_Fam_212_131_1 | 1 | 131 | 0.000000 |                                                                         |
| AGCCACGTGCCGTCAAGTTATCAAGCCTCCCGGAAAGGCTGATACCTTGACAACCAACCCATCTAGTAGCATTCGATGAGTCCGCGACTATCTTGTCTTACCTCAGAACCTTTGGCATAGATACACAGAC       |                           |   |     |          |                                                                         |
| Cbren.WS247                                                                                                                              | Cbren.WS247_Fam_213_122_1 | 1 | 122 | 0.000000 |                                                                         |
| AGTTCGGGGTAGCCAGCAAATCTATAGGAAGATCAACCAGCCACTAGGTACCCGCATCTTGACTGTCCAAAAGGTTGAGAGGGGGGAAAAAGTGTCTAAGTTACTAGAGAAGTGACAGC                  |                           |   |     |          |                                                                         |
| Cbren.WS247                                                                                                                              | Cbren.WS247_Fam_214_120_1 | 1 | 120 | 0.000000 |                                                                         |
| GATCCAAGAGTAGAGTAAGAAGCTGGTGAATTGCTCGATACCGTTGTTTCTTGTTCAGTAGTACATGGCTCCGTTGGTAGTCTCTTCTGAAGTTGCCGTACTCGATGAAGAGGCATCAGTT                |                           |   |     |          |                                                                         |
| Cbren.WS247                                                                                                                              | Cbren.WS247_Fam_215_120_1 | 1 | 120 | 0.000000 |                                                                         |
| TGTTTCAGATGAACCTTCAATAGGCTCGAGAAGTGGGGATGACCGTTTCGTAAGTGACTTCATGACCAAACGACTGTTTGAAGTCAGCTCCTGATGTTGCACTTGACCGATCTCTTTCTAGA               |                           |   |     |          |                                                                         |
| Cbren.WS247                                                                                                                              | Cbren.WS247_Fam_216_120_1 | 1 | 120 | 0.000000 |                                                                         |
| CTGACTTTTTCCCTAATTTTAAATAAATTGGTGGTTTCAAAAGTAGATGCTTCTGTGATGGATTGTGAAGTTTCCATCCCTCACTAGAGCCTAAGAGTCTGAAAATCTTCACTCTGAAAAG                |                           |   |     |          |                                                                         |
| Cbren.WS247                                                                                                                              | Cbren.WS247_Fam_217_119_1 | 1 | 119 | 0.000000 |                                                                         |
| TTTACTGGATTTTAGGAATGTCTAGCCGGAATTCAGCTCAATTTTCGATCCAATTTCCAATAATTTCAACCTTTCCCTTCGATCAAACATGCTGGGTCACTAATGTTGTCTCTAGGCAAAA                |                           |   |     |          |                                                                         |
| Cbren.WS247                                                                                                                              | Cbren.WS247_Fam_218_117_1 | 1 | 117 | 0.000000 |                                                                         |
| GTAATTTTTTGGTGTTTTATGTTATTTTATAAAAACGTGCAAGATCATATGAGACAGTTCCGAGTACCAATCAAAAATCTGCGAAATTAAGGAGACTTCGTTCTTTTTGAAACT                       |                           |   |     |          |                                                                         |
| Cbren.WS247                                                                                                                              | Cbren.WS247_Fam_219_116_1 | 1 | 116 | 0.000000 |                                                                         |
| TAGCAGAGAAGGACAGACGAAGGCTGTAGAACCCGAACGAAGCGACCATCCACCGTGCATAACCGTAGTTAAATATGAGTGGTCCGAACACTTTCATTATGCTCAGGTCTTTA                        |                           |   |     |          |                                                                         |
| Cbren.WS247                                                                                                                              | Cbren.WS247_Fam_220_110_1 | 1 | 110 | 0.000000 |                                                                         |
| TCTCACTAAAAAGTAAGATTATAGGCTACCAAAATATGATTTCTGAACAGAATCACTTCGAGTTCTTTGGTGGTTCATGGGTGGATTAGTCCCAGGACATACCTATAATTT                          |                           |   |     |          |                                                                         |
| Cbren.WS247                                                                                                                              | Cbren.WS247_Fam_221_109_1 | 1 | 109 | 0.000000 |                                                                         |
| TGGTGGCCTAGAACTATATCTGGCGGACATCTAAAATCAAGAAAATCAAAATGAGCCTCAACCAAGATTCAGCTCAACTTTGAAACGATTTACGACGTTTTGAAAGTT                             |                           |   |     |          |                                                                         |
| Cbren.WS247                                                                                                                              | Cbren.WS247_Fam_222_106_1 | 1 | 106 | 0.000000 |                                                                         |
| TGCTAAATAGACCTGATAGGAGTATTCGTGCTGCTGCCCTGGATTTCCGGTCCATGCGGTAGAGTCTATTCTTTTGGTGGTCTAACAGCTTCCGCTTCTTCTTA                                 |                           |   |     |          |                                                                         |
| Cbren.WS247                                                                                                                              | Cbren.WS247_Fam_223_96_1  | 1 | 96  | 0.000000 |                                                                         |
| TCGACCTGGCGGTTGAGCTGAGATCTACAACGTACCTCATCCCCCCCCCTTTAGGGCGGTTGTATTCTCTTCTTGGCCATGGGTTGATGCATT                                            |                           |   |     |          |                                                                         |
| Cbren.WS247                                                                                                                              | Cbren.WS247_Fam_224_93_1  | 1 | 93  | 0.000000 |                                                                         |
| TCAGATGATTCATCTGACGACGAAAAGAACAGCTATTAAAGCCAACGCCGAAGCAACTCCAGTCGCTGCCAAAAAGAGGCCGAATCTTCC                                               |                           |   |     |          |                                                                         |
| Cbren.WS247                                                                                                                              | Cbren.WS247_Fam_225_90_1  | 1 | 90  | 0.000000 |                                                                         |
| GCCGGTATGACACAATAGCAGAGCTAGATTAAGTAACTAGAAAAGCGTATATATGATTATATAGAAAAAGGTTCCAGACAATCACGAATGAT                                             |                           |   |     |          |                                                                         |
| Cbren.WS247                                                                                                                              | Cbren.WS247_Fam_226_90_1  | 1 | 90  | 0.000000 |                                                                         |
| GTCTTCCACTGGAACACTACTGGACAGTCGATGCATGAATTCGTGACTGGAACAGTGAATAGTGCTCCATCGATTGGTATGGACTTTGGAAT                                             |                           |   |     |          |                                                                         |
| Cbren.WS247                                                                                                                              | Cbren.WS247_Fam_227_86_1  | 1 | 86  | 0.000000 |                                                                         |
| AATTTTTCAATCGAGAATACAGCACAAAATGATGAACCTACAACGTATTGGATCAAATATCACAAGCTGGACCATTAGAAGCTCA                                                    |                           |   |     |          |                                                                         |
| Cbren.WS247                                                                                                                              | Cbren.WS247_Fam_228_84_1  | 1 | 84  | 0.000000 |                                                                         |
| CAGTCGAGGTGGACTCAGTCTGAGATGTGGTAGACTCAGGAGTAGTAGACGCTGTTCAGTTGTGCGAGGTTTCCGTAGTCGATT                                                     |                           |   |     |          |                                                                         |
| Cbren.WS247                                                                                                                              | Cbren.WS247_Fam_229_83_1  | 1 | 83  | 0.000000 |                                                                         |
| CGCATTGGTTTTTTTCGAATGACGACAAAATGGATTTGGCTAAAATCTTCGCCACATCCATCGCTATTTCGACAAAATATCGTACC                                                   |                           |   |     |          |                                                                         |
| Cbren.WS247                                                                                                                              | Cbren.WS247_Fam_230_81_1  | 1 | 81  | 0.000000 |                                                                         |
| TCACAAGGCTCTGTCTGTAGTCTCGCAAGGTTCCGTGGTAGTCTCGGACAACGTGGAGTTCAGGCATGGCTCCGTTGATGTT                                                       |                           |   |     |          |                                                                         |
| Cbren.WS247                                                                                                                              | Cbren.WS247_Fam_231_81_1  | 1 | 81  | 0.000000 |                                                                         |
| ACTGGAACCTCAGTTACCGACGAAAACACATTTGTCACCGATGAAAACCTCCATATGGCACAAGATCCACAGCCACTGCTCCA                                                      |                           |   |     |          |                                                                         |
| Cbren.WS247                                                                                                                              | Cbren.WS247_Fam_232_74_1  | 1 | 74  | 0.000000 |                                                                         |
| GCCTCTACAAAAGTCATCGGCAGGCAAAAAGATGACAGGAGTTTGTAGAGGCCAAGACTACAAAATAAAAGCT                                                                |                           |   |     |          |                                                                         |
| Cbren.WS247                                                                                                                              | Cbren.WS247_Fam_233_74_1  | 1 | 74  | 0.000000 |                                                                         |
| CATCTTGACTAGGAAGCCGCTTAGCTGCTAAGACACCATCATATTTAGGGCGTCGCCCTTAATGTTAAGACAT                                                                |                           |   |     |          |                                                                         |
| Cbren.WS247                                                                                                                              | Cbren.WS247_Fam_234_74_1  | 1 | 74  | 0.000000 |                                                                         |
| TAGGCTCCGCCATTTTTTTTTTCAATATTTTCAGTTTTGGGGCTGAAAATCAGTGTCTAAGGGTTGGGGGTAAC                                                               |                           |   |     |          |                                                                         |
| Cbren.WS247                                                                                                                              | Cbren.WS247_Fam_235_74_1  | 1 | 74  | 0.000000 |                                                                         |
| GTACGCAAACACACTTTTACACGAAATTCAGAAAATTTGGTTTTGGTACGAATTTGCTGTTGGATCTAGCGCCGG                                                              |                           |   |     |          |                                                                         |
| Cbren.WS247                                                                                                                              | Cbren.WS247_Fam_236_72_1  | 1 | 72  | 0.000000 | TTTCAGCCTTGGTCTTGGCTTCGGCTCCTTCTTGGTCTTTTCATCAGCCTCCTTCATGGCCTTGGCTTCAG |
| Cbren.WS247                                                                                                                              | Cbren.WS247_Fam_237_69_1  | 1 | 69  | 0.000000 | CAGGTTCTGGAGTAGATTGTTGAGTCTTGACATGCTTTCTGTTGAACTCTTCCAACCAATTCGATGAA    |
| Cbren.WS247                                                                                                                              | Cbren.WS247_Fam_238_69_1  | 1 | 69  | 0.000000 | TCAAATACTGTATTTCTCTGGAGGCAAGGATTCGATGACTTCATTCGACCATATCCGAATTTGAATCA    |
| Cbren.WS247                                                                                                                              | Cbren.WS247_Fam_239_69_1  | 1 | 69  | 0.000000 | AGTTGGATACGAAAAGTTCCAAAGATTGTGTCTGTAAGAGTTTCCAGGACCCAAAGTCAAATTTGACCCA  |
| Cbren.WS247                                                                                                                              | Cbren.WS247_Fam_240_69_1  | 1 | 69  | 0.000000 | AAGTTCTCGAATCTGGCATTGTGATCTGCTGACGAAGAAGACATCCACCCTTGCCTTCCGAAAGCAA     |
| Cbren.WS247                                                                                                                              | Cbren.WS247_Fam_241_68_1  | 1 | 68  | 0.000000 | CCCTGCCCCAGATTCTGTCTGGGATTTATCCGGGGATTTACGCTGAAGACGAGAAACAACATTTCCGGTG  |
| Cbren.WS247                                                                                                                              | Cbren.WS247_Fam_242_63_1  | 1 | 63  | 0.000000 | CCATCATCGGTGGATAACCTGGAATGGTGGATTCTGAGCATCTGACGTTGTTGCGGGGGCA           |

|             |                          |   |    |          |                                                                 |
|-------------|--------------------------|---|----|----------|-----------------------------------------------------------------|
| Cbren.WS247 | Cbren.WS247_Fam_243_63_1 | 1 | 63 | 0.000000 | GACGCAGAGAAACGAAAATGCCTACGGGTCTGCGCTCTCTACTAGTAGTGACAGCTATTGCGA |
| Cbren.WS247 | Cbren.WS247_Fam_244_58_1 | 1 | 58 | 0.000000 | CTAGGTCACCAAATCTAGAAAGTTAGGCCGATGGACTAATTTTCCAGGATTTGGATTT      |
| Cbren.WS247 | Cbren.WS247_Fam_245_57_1 | 1 | 57 | 0.000000 | TAGACTCTGTTCGATTGAGTACTGAAGGTTGAATCAGAGATTGTAGTATCAGTGAATG      |
| Cbren.WS247 | Cbren.WS247_Fam_246_56_1 | 1 | 56 | 0.000000 | GGGAATTCAAAATTTTCGAAAACCTTTTGGTGGAAATTTAAAACCTTCGAAAACCTTTTGGC  |
| Cbren.WS247 | Cbren.WS247_Fam_247_55_1 | 1 | 55 | 0.000000 | TCTGCGCTCTCCCTACTTACC GGAGAGAGCGCAGACAGCTAGACGCTCTGGCCG         |
| Cbren.WS247 | Cbren.WS247_Fam_248_55_1 | 1 | 55 | 0.000000 | GATAATGAAACAAACATGCCTTTGATTATACTCATTCAAACCGTTATGATCAGGA         |
| Cbren.WS247 | Cbren.WS247_Fam_249_54_1 | 1 | 54 | 0.000000 | TTTGGTGGTGATCCATCCAGATCGATAACCTCTCTTGGGTTGAGCTGGAGCAAG          |
| Cbren.WS247 | Cbren.WS247_Fam_250_51_1 | 1 | 51 | 0.000000 | AAGAAGATCGGGTGGCTGACAAGGTCATCGGTTTCGCTAGACTGGACTGGTG            |
| Cbren.WS247 | Cbren.WS247_Fam_251_49_1 | 1 | 49 | 0.000000 | AAACTAGGCAATCAAACCTAGTTTTTGTGGTTTCTAGGCCATCGGTTGGAA             |
| Cbren.WS247 | Cbren.WS247_Fam_252_48_1 | 1 | 48 | 0.000000 | ACACTCCTCGCCATCTCCAGCGAAGAACGAGTCCGACTGCTGGACGCG                |
| Cbren.WS247 | Cbren.WS247_Fam_253_48_1 | 1 | 48 | 0.000000 | ATGGCTCGGGATGGAAGGAGGAGGACGACAACAACGACTGGATCATGG                |
| Cbren.WS247 | Cbren.WS247_Fam_254_48_1 | 1 | 48 | 0.000000 | TCCTTTTGGCCTTGGCCTCAGTATCAGCCTTGGTCTTTGCTTCAGCG                 |
| Cbren.WS247 | Cbren.WS247_Fam_255_47_1 | 1 | 47 | 0.000000 | GTTTCTCTGCGCTCTAACTCCATGACGCAGAGAAGTCAGACACTCTC                 |
| Cbren.WS247 | Cbren.WS247_Fam_256_45_1 | 1 | 45 | 0.000000 | GGACCACCAGGACCTCAAGGAGGACGTGGACAAGGCCAGACTTC                    |
| Cbren.WS247 | Cbren.WS247_Fam_257_45_1 | 1 | 45 | 0.000000 | CCTGACCAGAACAGGCCAGGCAGGGCTGGTCCAGGCTAGTCCAGG                   |
| Cbren.WS247 | Cbren.WS247_Fam_258_43_1 | 1 | 43 | 0.000000 | TTTGGTTTTTAGGCCTAAACTTTTCAATTTTGGGACTAAACT                      |
| Cbren.WS247 | Cbren.WS247_Fam_259_41_1 | 1 | 41 | 0.000000 | CTGACGATTGCTCAGTATTGCACCTAAAAACACTCGTTTTTT                      |
| Cbren.WS247 | Cbren.WS247_Fam_260_40_1 | 1 | 40 | 0.000000 | TTTCCGTTTTCCGTTTCCGGCGGAAATATTTTCTGGAAAT                        |
| Cbren.WS247 | Cbren.WS247_Fam_261_40_1 | 1 | 40 | 0.000000 | GTAGTGACGTAGGGACGTAGGCACGTAGGCTCGTAGGCAT                        |
| Cbren.WS247 | Cbren.WS247_Fam_262_40_1 | 1 | 40 | 0.000000 | TGGCGGGGGCTTAGACTGCAACTCCGCTCCTTTTCGAATG                        |
| Cbren.WS247 | Cbren.WS247_Fam_263_40_1 | 1 | 40 | 0.000000 | GGATGTCCGGATGTCCAGGAATCTGTCTGTCTGTACTCCA                        |
| Cbren.WS247 | Cbren.WS247_Fam_264_39_1 | 1 | 39 | 0.000000 | GATGTTTCAGTGACGGCTGCGGTGGTGGTCTCTTCTCCT                         |
| Cbren.WS247 | Cbren.WS247_Fam_265_39_1 | 1 | 39 | 0.000000 | GATGTGCAGGTTCCATCACTGCAGTAACATATATAGTTA                         |
| Cbren.WS247 | Cbren.WS247_Fam_266_39_1 | 1 | 39 | 0.000000 | TTCCAGAAAGTTCCAGAACCTCCAGGAAAGCTCCAAAAG                         |
| Cbren.WS247 | Cbren.WS247_Fam_267_39_1 | 1 | 39 | 0.000000 | TCCGGATATCCGGATATCAAGATAACAAAAGTCTGTGTG                         |
| Cbren.WS247 | Cbren.WS247_Fam_268_39_1 | 1 | 39 | 0.000000 | CAGGCCATTCGGGCTGCTCCAGGACAATTCAAAATAAA                          |
| Cbren.WS247 | Cbren.WS247_Fam_269_39_1 | 1 | 39 | 0.000000 | GGTTACTAACCTGCAAGATTTTTTCTGATTTTCTAGCA                          |
| Cbren.WS247 | Cbren.WS247_Fam_270_37_1 | 1 | 37 | 0.000000 | GACACCACCTCTGGCGCCGCTCCACCTCAGCGA                               |
| Cbren.WS247 | Cbren.WS247_Fam_271_36_1 | 1 | 36 | 0.000000 | CCGCCCACTCAATCTGAATCGAAGTTTGTAGGCT                              |
| Cbren.WS247 | Cbren.WS247_Fam_272_36_1 | 1 | 36 | 0.000000 | GCGCTCTATTGAGAATATTGGGAAATTCGAGAAAT                             |
| Cbren.WS247 | Cbren.WS247_Fam_273_36_1 | 1 | 36 | 0.000000 | GTCCGGATGTCTATGTCCCTGTTTTTCTGTCTGTAT                            |
| Cbren.WS247 | Cbren.WS247_Fam_274_36_1 | 1 | 36 | 0.000000 | ATTGACAATTTCCAGAAAACCATGCAAAAAGCGCTCT                           |
| Cbren.WS247 | Cbren.WS247_Fam_275_36_1 | 1 | 36 | 0.000000 | CCGAGCCGACTACCACCCTGTCCCGACGACTACTA                             |
| Cbren.WS247 | Cbren.WS247_Fam_276_36_1 | 1 | 36 | 0.000000 | TCCGGATGTCCGGATGTCTGTCTGTGGGTAGGTTTA                            |
| Cbren.WS247 | Cbren.WS247_Fam_277_35_1 | 1 | 35 | 0.000000 | TACTGTAGCTGGCTTCCTGCCTATCCTACCAGGAT                             |
| Cbren.WS247 | Cbren.WS247_Fam_278_34_1 | 1 | 34 | 0.000000 | TTTGTTCCCGGAACGAAAATATAGACTGTCTAAAA                             |
| Cbren.WS247 | Cbren.WS247_Fam_279_33_1 | 1 | 33 | 0.000000 | CTATTTTCTCAAGCGCTACTGGGTGTTCGACTG                               |
| Cbren.WS247 | Cbren.WS247_Fam_280_32_1 | 1 | 32 | 0.000000 | ATGGTTTTTACAAATGAAAAACATAAACTC                                  |
| Cbren.WS247 | Cbren.WS247_Fam_281_32_1 | 1 | 32 | 0.000000 | GGCCTAGGATTTTTCTAGGCCACCGGGACCAT                                |
| Cbren.WS247 | Cbren.WS247_Fam_282_32_1 | 1 | 32 | 0.000000 | GAAACCGGACATTTTCGTAACCGAGACATTC                                 |
| Cbren.WS247 | Cbren.WS247_Fam_283_31_1 | 1 | 31 | 0.000000 | AGGGTCTAGGGTCCAGGGTAGCCTAGGTCCC                                 |
| Cbren.WS247 | Cbren.WS247_Fam_284_31_1 | 1 | 31 | 0.000000 | TTTATTCGAGTGCAAAGTGAGTTCATATATT                                 |
| Cbren.WS247 | Cbren.WS247_Fam_285_30_1 | 1 | 30 | 0.000000 | TAAGCCTAAGATTATGAGTAGTTCAAGCG                                   |
| Cbren.WS247 | Cbren.WS247_Fam_286_30_1 | 1 | 30 | 0.000000 | GTCGTTGGAACAGTAGTGGTAGCCACAGTT                                  |
| Cbren.WS247 | Cbren.WS247_Fam_287_30_1 | 1 | 30 | 0.000000 | CCGCTGATGAAGAAGTTTCTGAGACTGAG                                   |
| Cbren.WS247 | Cbren.WS247_Fam_288_30_1 | 1 | 30 | 0.000000 | CCTAAGCCTAAGCCTAAGCTTCAGTCGTGA                                  |
| Cbren.WS247 | Cbren.WS247_Fam_289_30_1 | 1 | 30 | 0.000000 | TAAAAAGTGACTCCTCCATGTAAGTGACCA                                  |
| Cbren.WS247 | Cbren.WS247_Fam_290_30_1 | 1 | 30 | 0.000000 | TTTGGGAATGATTAGGTGCCGAGGGAAAGT                                  |
| Cbren.WS247 | Cbren.WS247_Fam_291_30_1 | 1 | 30 | 0.000000 | AAGTTGCCCAATGCTCGGCAAGCAAAAAGAC                                 |
| Cbren.WS247 | Cbren.WS247_Fam_292_30_1 | 1 | 30 | 0.000000 | TAAGCCTAAATCTATACCTAAGCCGGGGTC                                  |
| Cbren.WS247 | Cbren.WS247_Fam_293_29_1 | 1 | 29 | 0.000000 | GCCTAAACAGCCTAAATCGGCCCAAAATCG                                  |
| Cbren.WS247 | Cbren.WS247_Fam_294_29_1 | 1 | 29 | 0.000000 | GCAGACCAGACGGTAAAAATGGAGCTAA                                    |
| Cbren.WS247 | Cbren.WS247_Fam_295_29_1 | 1 | 29 | 0.000000 | TTTGGGTCTGCTTATTTTCCCATACCC                                     |
| Cbren.WS247 | Cbren.WS247_Fam_296_29_1 | 1 | 29 | 0.000000 | TCAACTGCTATGAAATCTTCTGCTATATC                                   |
| Cbren.WS247 | Cbren.WS247_Fam_297_29_1 | 1 | 29 | 0.000000 | TCTGGAAGTTCTGGAAGGTCCTAGAAGTT                                   |
| Cbren.WS247 | Cbren.WS247_Fam_298_29_1 | 1 | 29 | 0.000000 | AAGTGCCGCTTCCAGGCGTCATGATCCAA                                   |
| Cbren.WS247 | Cbren.WS247_Fam_299_28_1 | 1 | 28 | 0.000000 | TCAAATTCCTTGCTGGAACTTAAAAAT                                     |

|             |                          |   |    |          |                               |
|-------------|--------------------------|---|----|----------|-------------------------------|
| Cbren.WS247 | Cbren.WS247_Fam_300_28_1 | 1 | 28 | 0.000000 | AAAAAGCTGAAATTTTGGAGGAACTGG   |
| Cbren.WS247 | Cbren.WS247_Fam_301_28_1 | 1 | 28 | 0.000000 | AGAAAAAAGAGAATCAAATTAATAATAG  |
| Cbren.WS247 | Cbren.WS247_Fam_302_28_1 | 1 | 28 | 0.000000 | AGGTGGCTCCACTCCTCACAGTCCCCA   |
| Cbren.WS247 | Cbren.WS247_Fam_303_27_1 | 1 | 27 | 0.000000 | ACTGATTTTCGAGAAAAATTTTCGCAAAA |
| Cbren.WS247 | Cbren.WS247_Fam_304_27_1 | 1 | 27 | 0.000000 | TCCTGAACCACCTGGAGTTCCTGGACT   |
| Cbren.WS247 | Cbren.WS247_Fam_305_27_1 | 1 | 27 | 0.000000 | AAGTCCGATCCGGTCTATTTTCGTCCCA  |
| Cbren.WS247 | Cbren.WS247_Fam_306_25_1 | 1 | 25 | 0.000000 | TTTTCGAAAAATTTTTCGGACCAAAAT   |
| Cbren.WS247 | Cbren.WS247_Fam_307_24_1 | 1 | 24 | 0.000000 | CCAGAAAAAAGAATTCCTAAG         |
| Cbren.WS247 | Cbren.WS247_Fam_308_24_1 | 1 | 24 | 0.000000 | TAGGACTAAAAACCCCGGCTGTTT      |
| Cbren.WS247 | Cbren.WS247_Fam_309_24_1 | 1 | 24 | 0.000000 | ATGGCTCATGGTGGTCAAAGTCTG      |
| Cbren.WS247 | Cbren.WS247_Fam_310_24_1 | 1 | 24 | 0.000000 | ACATTCCGACAACCTGCATATTTGG     |
| Cbren.WS247 | Cbren.WS247_Fam_311_24_1 | 1 | 24 | 0.000000 | AACCGATGCTCTAAGATCTCCGGC      |
| Cbren.WS247 | Cbren.WS247_Fam_312_24_1 | 1 | 24 | 0.000000 | TTACGACCGGAATCCCACCGGAA       |
| Cbren.WS247 | Cbren.WS247_Fam_313_24_1 | 1 | 24 | 0.000000 | AAATCTGAAAAATCTGGCGTTGCG      |
| Cbren.WS247 | Cbren.WS247_Fam_314_24_1 | 1 | 24 | 0.000000 | AGTTGGCGGAATTCCTGGTTGTCC      |
| Cbren.WS247 | Cbren.WS247_Fam_315_24_1 | 1 | 24 | 0.000000 | AGCAATAGCAGTTGATCAGCCTGT      |
| Cbren.WS247 | Cbren.WS247_Fam_316_24_1 | 1 | 24 | 0.000000 | GATATCTGGACGCTCGAAAATTGA      |
| Cbren.WS247 | Cbren.WS247_Fam_317_23_1 | 1 | 23 | 0.000000 | GGCAGCTTGCCACTTTCCTCC         |
| Cbren.WS247 | Cbren.WS247_Fam_318_22_1 | 1 | 22 | 0.000000 | TTTTCAGGCTGTTGTCTGCGTT        |
| Cbren.WS247 | Cbren.WS247_Fam_319_22_1 | 1 | 22 | 0.000000 | ATGGAATTTTGAACACAAAT          |
| Cbren.WS247 | Cbren.WS247_Fam_320_22_1 | 1 | 22 | 0.000000 | CCGCCACTTTTGGGTTTAGCT         |
| Cbren.WS247 | Cbren.WS247_Fam_321_22_1 | 1 | 22 | 0.000000 | GATTTCCGGACAGTTTCCTGGG        |
| Cbren.WS247 | Cbren.WS247_Fam_322_22_1 | 1 | 22 | 0.000000 | TTGGAGCTGCCTAGGCTACAAA        |
| Cbren.WS247 | Cbren.WS247_Fam_323_22_1 | 1 | 22 | 0.000000 | TCCCCGGCGAATCGAAATCAG         |
| Cbren.WS247 | Cbren.WS247_Fam_324_22_1 | 1 | 22 | 0.000000 | TTTTTCATGGATTTTTTCCGAAC       |
| Cbren.WS247 | Cbren.WS247_Fam_325_22_1 | 1 | 22 | 0.000000 | GAGCCCAAATCAAGCTTTTTT         |
| Cbren.WS247 | Cbren.WS247_Fam_326_22_1 | 1 | 22 | 0.000000 | ACCCGGGTAGGGACAGTTCGAG        |
| Cbren.WS247 | Cbren.WS247_Fam_327_21_1 | 1 | 21 | 0.000000 | TTCCAGTAGAAGAGGCAGTGC         |
| Cbren.WS247 | Cbren.WS247_Fam_328_21_1 | 1 | 21 | 0.000000 | TGAGGTTAAGGAGCCTAAGCT         |
| Cbren.WS247 | Cbren.WS247_Fam_329_21_1 | 1 | 21 | 0.000000 | GCAGGTTGCCGAAAAGAGGA          |
| Cbren.WS247 | Cbren.WS247_Fam_330_21_1 | 1 | 21 | 0.000000 | TACAGTAATCCTAGAGGGTCA         |
| Cbren.WS247 | Cbren.WS247_Fam_331_21_1 | 1 | 21 | 0.000000 | TTAGGCTTAGTAACATAAGAT         |
| Cbren.WS247 | Cbren.WS247_Fam_332_21_1 | 1 | 21 | 0.000000 | GAGCAACCGGCTCCTGCACCT         |
| Cbren.WS247 | Cbren.WS247_Fam_333_21_1 | 1 | 21 | 0.000000 | TCTACAGTAATCTCCATTTTT         |
| Cbren.WS247 | Cbren.WS247_Fam_334_21_1 | 1 | 21 | 0.000000 | CAGGAAGAAGGAACCAAGAG          |
| Cbren.WS247 | Cbren.WS247_Fam_335_21_1 | 1 | 21 | 0.000000 | CAAATTTTTTTCGGGATTTTT         |
| Cbren.WS247 | Cbren.WS247_Fam_336_21_1 | 1 | 21 | 0.000000 | AGACAACAGACACCTATTAT          |
| Cbren.WS247 | Cbren.WS247_Fam_337_20_1 | 1 | 20 | 0.000000 | CATTGCACCTCCATTTTGAC          |
| Cbren.WS247 | Cbren.WS247_Fam_338_20_1 | 1 | 20 | 0.000000 | CAAGAGTTTCTATGAAGATG          |
| Cbren.WS247 | Cbren.WS247_Fam_339_20_1 | 1 | 20 | 0.000000 | TGGTCTAGAATCCCAAAAAG          |
| Cbren.WS247 | Cbren.WS247_Fam_340_20_1 | 1 | 20 | 0.000000 | TTCTAGGCGATTCCCTGGAA          |
| Cbren.WS247 | Cbren.WS247_Fam_341_20_1 | 1 | 20 | 0.000000 | CTGAAAATGTCTTAATTACG          |
| Cbren.WS247 | Cbren.WS247_Fam_342_20_1 | 1 | 20 | 0.000000 | GCTGCTAGAACAGTCTGGC           |
| Cbren.WS247 | Cbren.WS247_Fam_343_20_1 | 1 | 20 | 0.000000 | TGTAGAGGTTAAGGACTGTC          |
| Cbren.WS247 | Cbren.WS247_Fam_344_20_1 | 1 | 20 | 0.000000 | GCCTTCAAAGTAGTCCATGC          |
| Cbren.WS247 | Cbren.WS247_Fam_345_20_1 | 1 | 20 | 0.000000 | TCTCAACTGCTTTAGGCCGC          |
| Cbren.WS247 | Cbren.WS247_Fam_346_20_1 | 1 | 20 | 0.000000 | AAGCCTTAGCCGACTTCCC           |
| Cbren.WS247 | Cbren.WS247_Fam_347_20_1 | 1 | 20 | 0.000000 | CTGCTTAGGTAAATAGAGGG          |
| Cbren.WS247 | Cbren.WS247_Fam_348_20_1 | 1 | 20 | 0.000000 | AGGGGGCCCATCTTAAGAGA          |
| Cbren.WS247 | Cbren.WS247_Fam_349_20_1 | 1 | 20 | 0.000000 | CATAAAATGCTTTTTCAGGT          |
| Cbren.WS247 | Cbren.WS247_Fam_350_20_1 | 1 | 20 | 0.000000 | TAAGCAGCTTTGAGGGGTCC          |
| Cbren.WS247 | Cbren.WS247_Fam_351_20_1 | 1 | 20 | 0.000000 | AATTTGAATTTAGAATGGTA          |
| Cbren.WS247 | Cbren.WS247_Fam_352_20_1 | 1 | 20 | 0.000000 | TACAGTAAGCTCAAAAAGC           |
| Cbren.WS247 | Cbren.WS247_Fam_353_20_1 | 1 | 20 | 0.000000 | AGCGGCTTAGAAAGGTTAGG          |
| Cbren.WS247 | Cbren.WS247_Fam_354_20_1 | 1 | 20 | 0.000000 | AGACTAGATCAGGCCAGATT          |
| Cbren.WS247 | Cbren.WS247_Fam_355_20_1 | 1 | 20 | 0.000000 | GCGGCCTATGCCGAAGCTG           |
| Cbren.WS247 | Cbren.WS247_Fam_356_20_1 | 1 | 20 | 0.000000 | GGCAAGCTGCTTAAGTGTG           |

|             |                          |   |    |          |                      |
|-------------|--------------------------|---|----|----------|----------------------|
| Cbren.WS247 | Cbren.WS247_Fam_357_19_1 | 1 | 19 | 0.000000 | AATTGAAAAATGCTCCAGCA |
| Cbren.WS247 | Cbren.WS247_Fam_358_19_1 | 1 | 19 | 0.000000 | GAAATGCGCCAAGACACAA  |
| Cbren.WS247 | Cbren.WS247_Fam_359_19_1 | 1 | 19 | 0.000000 | TGACGCGTTTTTCGGTGGGT |
| Cbren.WS247 | Cbren.WS247_Fam_360_19_1 | 1 | 19 | 0.000000 | AGAAGCGTTTTTGTGCGTCC |
| Cbren.WS247 | Cbren.WS247_Fam_361_19_1 | 1 | 19 | 0.000000 | TCCTTTTTTCCCATCCGTT  |
| Cbren.WS247 | Cbren.WS247_Fam_362_19_1 | 1 | 19 | 0.000000 | CAAACTAGGTTCTTGCCC   |
| Cbren.WS247 | Cbren.WS247_Fam_363_19_1 | 1 | 19 | 0.000000 | AAGGGACCGTTCAGTTTG   |
| Cbren.WS247 | Cbren.WS247_Fam_364_19_1 | 1 | 19 | 0.000000 | AGTGGTCCCATGGGAGTTT  |
| Cbren.WS247 | Cbren.WS247_Fam_365_19_1 | 1 | 19 | 0.000000 | GCCTAAACCCAAGGGTAAG  |
| Cbren.WS247 | Cbren.WS247_Fam_366_19_1 | 1 | 19 | 0.000000 | TCAAAGGACCTATAAATTG  |
| Cbren.WS247 | Cbren.WS247_Fam_367_18_1 | 1 | 18 | 0.000000 | AGCTGAGCCAAAGGTAGT   |
| Cbren.WS247 | Cbren.WS247_Fam_368_18_1 | 1 | 18 | 0.000000 | TGTGACAAAAAAGAGGAG   |
| Cbren.WS247 | Cbren.WS247_Fam_369_18_1 | 1 | 18 | 0.000000 | GGCACTGGCGTCTTTAGC   |
| Cbren.WS247 | Cbren.WS247_Fam_370_18_1 | 1 | 18 | 0.000000 | TCTTTTACTTTTACTGAT   |
| Cbren.WS247 | Cbren.WS247_Fam_371_18_1 | 1 | 18 | 0.000000 | CCGAGGCGCAGACTACCA   |
| Cbren.WS247 | Cbren.WS247_Fam_372_18_1 | 1 | 18 | 0.000000 | GGCAAGTTGCCAAACGA    |
| Cbren.WS247 | Cbren.WS247_Fam_373_18_1 | 1 | 18 | 0.000000 | ATTCGTCTCTCTTTTCTC   |
| Cbren.WS247 | Cbren.WS247_Fam_374_18_1 | 1 | 18 | 0.000000 | TTTTCGAAAATGCCATT    |
| Cbren.WS247 | Cbren.WS247_Fam_375_18_1 | 1 | 18 | 0.000000 | CACGAGATGCAGAAGCTC   |
| Cbren.WS247 | Cbren.WS247_Fam_376_18_1 | 1 | 18 | 0.000000 | CCACGTCCACTGTTTCCA   |
| Cbren.WS247 | Cbren.WS247_Fam_377_17_1 | 1 | 17 | 0.000000 | AAATTTCAAAACTTTTT    |
| Cbren.WS247 | Cbren.WS247_Fam_378_16_1 | 1 | 16 | 0.000000 | GACAACCGGATTATCG     |
| Cbren.WS247 | Cbren.WS247_Fam_379_16_1 | 1 | 16 | 0.000000 | ATCTTTGACTTCCAGT     |
| Cbren.WS247 | Cbren.WS247_Fam_380_16_1 | 1 | 16 | 0.000000 | ACCCAGGTACTCATAT     |
| Cbren.WS247 | Cbren.WS247_Fam_381_16_1 | 1 | 16 | 0.000000 | TAGGTTTAGGAGAGTT     |
| Cbren.WS247 | Cbren.WS247_Fam_382_16_1 | 1 | 16 | 0.000000 | AAACGAAAAACGGAA      |
| Cbren.WS247 | Cbren.WS247_Fam_383_16_1 | 1 | 16 | 0.000000 | GAAAGTGAGAGAGAGG     |
| Cbren.WS247 | Cbren.WS247_Fam_384_16_1 | 1 | 16 | 0.000000 | AGTGCAATCGTGCTCA     |
| Cbren.WS247 | Cbren.WS247_Fam_385_16_1 | 1 | 16 | 0.000000 | GAAATCTGACGTATAT     |
| Cbren.WS247 | Cbren.WS247_Fam_386_15_1 | 1 | 15 | 0.000000 | TCAGTTGTCGAGGTT      |
| Cbren.WS247 | Cbren.WS247_Fam_387_15_1 | 1 | 15 | 0.000000 | TCCGGCGGTAGGGT       |
| Cbren.WS247 | Cbren.WS247_Fam_388_15_1 | 1 | 15 | 0.000000 | CGTCAGGCTGAGGTC      |
| Cbren.WS247 | Cbren.WS247_Fam_389_15_1 | 1 | 15 | 0.000000 | TCAGGCTTAGGCTTT      |
| Cbren.WS247 | Cbren.WS247_Fam_390_15_1 | 1 | 15 | 0.000000 | GGAGGCGGAGGATGT      |
| Cbren.WS247 | Cbren.WS247_Fam_391_15_1 | 1 | 15 | 0.000000 | AGCTGCAGCACGAGC      |
| Cbren.WS247 | Cbren.WS247_Fam_392_15_1 | 1 | 15 | 0.000000 | CTACTACAACACTACGC    |
| Cbren.WS247 | Cbren.WS247_Fam_393_15_1 | 1 | 15 | 0.000000 | CGAAAAATTTTTTTTT     |
| Cbren.WS247 | Cbren.WS247_Fam_394_14_1 | 1 | 14 | 0.000000 | GGAGGTTTTTCCCG       |
| Cbren.WS247 | Cbren.WS247_Fam_395_14_1 | 1 | 14 | 0.000000 | CTGCCTAGCCCTAA       |
| Cbren.WS247 | Cbren.WS247_Fam_396_14_1 | 1 | 14 | 0.000000 | ATTCTACATTTATA       |
| Cbren.WS247 | Cbren.WS247_Fam_397_12_1 | 1 | 12 | 0.000000 | TGACCTTGACCT         |
| Cbren.WS247 | Cbren.WS247_Fam_398_12_1 | 1 | 12 | 0.000000 | CTGTACCTGGGC         |
| Cbren.WS247 | Cbren.WS247_Fam_399_12_1 | 1 | 12 | 0.000000 | CCTTGCCGTCTC         |
| Cbren.WS247 | Cbren.WS247_Fam_400_12_1 | 1 | 12 | 0.000000 | GCTCCGGCTCCG         |
| Cbren.WS247 | Cbren.WS247_Fam_401_11_1 | 1 | 11 | 0.000000 | CCTCTACTAAC          |
| Cbren.WS247 | Cbren.WS247_Fam_402_11_1 | 1 | 11 | 0.000000 | AGCCTTCAAAT          |
| Cbren.WS247 | Cbren.WS247_Fam_403_10_1 | 1 | 10 | 0.000000 | ACAAAACGCA           |



## C. remanei

| Genome                                                                                                                                                                                          | Family name               | Number of sequences | Alignment length | Score    | Consensus without gaps                                                |
|-------------------------------------------------------------------------------------------------------------------------------------------------------------------------------------------------|---------------------------|---------------------|------------------|----------|-----------------------------------------------------------------------|
| Crema.WS247                                                                                                                                                                                     | Crema.WS247_Fam_1_14_208  | 208                 | 14               | 0.817522 | TTCCGacTTCCGaC                                                        |
| Crema.WS247                                                                                                                                                                                     | Crema.WS247_Fam_2_184_98  | 98                  | 187              | 0.896850 |                                                                       |
| TTCACAAAAGTCTAtATGAGAAAnTTCCAAaACTGTGCTTtCAAcGTGTATTGTCTCTAACTTTTTTCTGGATGAGATATCTGAAAACAGTAAAgTGaTTCGAattGGCAaTGGATtgTCTACTaCTGTGCCAATTTTCAGCCAATAacGTTCAAACGTAAACAGGCCGACACGCCTTGAAGT         |                           |                     |                  |          |                                                                       |
| Crema.WS247                                                                                                                                                                                     | Crema.WS247_Fam_3_180_79  | 79                  | 186              | 0.866553 |                                                                       |
| TTTTGAGATTTGGTCCAAGTGGaCTTTTCTGCCAAAtACATTTTTtATCAGAACTCAGTCAGTTTTGgACGGATCncagAGATtTTTATACCATTTCGAAAGCtCTCGTTTTTCTCTAtAAAAATGATcTAATTTaAAAAATTTTGTTCAAAAATAAAGTTGTAGTGACATTTCCGTCaAT           |                           |                     |                  |          |                                                                       |
| Crema.WS247                                                                                                                                                                                     | Crema.WS247_Fam_4_14_69   | 69                  | 14               | 0.873300 | GAAgAAGGAAGAAG                                                        |
| Crema.WS247                                                                                                                                                                                     | Crema.WS247_Fam_5_54_47   | 47                  | 70               | 0.607405 | aTtATAATTTTtATGATTTCTAgAtttAAAAAGTCCTGTTTTTAGGAaTTTcA                 |
| Crema.WS247                                                                                                                                                                                     | Crema.WS247_Fam_6_46_33   | 33                  | 46               | 0.876098 | TCAGAAAATGTCCGACAGACATTTTCGAgTACTTCnnAAAnATGTAT                       |
| Crema.WS247                                                                                                                                                                                     | Crema.WS247_Fam_7_12_32   | 32                  | 14               | 0.605415 | TTtTCGAaAgAT                                                          |
| Crema.WS247                                                                                                                                                                                     | Crema.WS247_Fam_8_192_31  | 31                  | 196              | 0.874109 |                                                                       |
| TTCAGCTTCATTTTTTCCAAATTCAAAATACTCATTTTCATTTCAGATccTACTAnAAAAAGaAAACCACCAATCGAAAGAACTCGtTGATTTACATCAAGTTCTATGGTTaATCTnTTTTCTCATCTCTTtATtCATTTTTATGATCAAAAACTGTCGGGAGAAATcaATTTGACATTTTCGCCACTT   |                           |                     |                  |          |                                                                       |
| Crema.WS247                                                                                                                                                                                     | Crema.WS247_Fam_9_20_29   | 29                  | 20               | 0.774713 | TTAGACGTCCcAAAAcAn                                                    |
| Crema.WS247                                                                                                                                                                                     | Crema.WS247_Fam_10_27_28  | 28                  | 31               | 0.609234 | gGAGTCGGAAGTAAAATTCctaAtCc                                            |
| Crema.WS247                                                                                                                                                                                     | Crema.WS247_Fam_11_20_27  | 27                  | 21               | 0.748971 | CAAGTATCCAAAAnTtAnac                                                  |
| Crema.WS247                                                                                                                                                                                     | Crema.WS247_Fam_12_130_26 | 26                  | 131              | 0.949485 |                                                                       |
| CACACTCGAGTTGGGTgCTTTGTCAAATAAAGTTaATTTTTAGgATTATATCATTATAAATAGGTAATTATTAActTTGTTTTAgatGATAGGTAAGCCAACGGCAGTGTGGGCTCCTTTTGGAGTTGC                                                               |                           |                     |                  |          |                                                                       |
| Crema.WS247                                                                                                                                                                                     | Crema.WS247_Fam_13_14_26  | 26                  | 17               | 0.680995 | TCCGGaTTCCGGAT                                                        |
| Crema.WS247                                                                                                                                                                                     | Crema.WS247_Fam_14_119_19 | 19                  | 121              | 0.802394 |                                                                       |
| aTCCACGTCATAAAAAAGtTatGaGCcTTTTCTAAAAtGTGACGACGTGAAGATTTTTGATATCaTcGGATTCaGaAAAAaTAGAGGATTCCAAACGTGTnGTCcGtTtCtGGATTG                                                                           |                           |                     |                  |          |                                                                       |
| Crema.WS247                                                                                                                                                                                     | Crema.WS247_Fam_15_21_19  | 19                  | 21               | 0.834029 | CTGAGGCTAACTGaGatTTTG                                                 |
| Crema.WS247                                                                                                                                                                                     | Crema.WS247_Fam_16_27_17  | 17                  | 27               | 0.860203 | CGCTAgAATCGnCTGGGGTGCCTGCGG                                           |
| Crema.WS247                                                                                                                                                                                     | Crema.WS247_Fam_17_64_16  | 16                  | 64               | 0.873003 | AGATGATCGAGAACATATGTATTTTCATTCTCTcTcTcTTCTTTTTCTCTCATCTCATTccG        |
| Crema.WS247                                                                                                                                                                                     | Crema.WS247_Fam_18_10_16  | 16                  | 10               | 0.918889 | CTTCTAGAAA                                                            |
| Crema.WS247                                                                                                                                                                                     | Crema.WS247_Fam_19_192_15 | 15                  | 193              | 0.902015 |                                                                       |
| GTCCGATGAAAACGAAATGAGTTGCGTGTGAATTACTGAATTTTCAGcATTCAATTTGGCGGAAAatTAGaAAATGAAGTCTtGCACAGCGTTTTTCGATTGtGAAACAAGAAAATAAGAAAAGTGGACaTTCTATCCATAGAACTgaCnAACTCAACGAGATCTTTCTAATGGTtATTTTCAGTATTaCT |                           |                     |                  |          |                                                                       |
| Crema.WS247                                                                                                                                                                                     | Crema.WS247_Fam_20_70_15  | 15                  | 70               | 0.914376 | TGAGGTGAGAGAAAGAAAATgATgAgAAaAAGAGAtaAAAAaAAGGAGTTGTCTCcATCACCTCCTAT  |
| Crema.WS247                                                                                                                                                                                     | Crema.WS247_Fam_21_61_15  | 15                  | 63               | 0.822424 | CTGACTGCTTCGGTgGCTGAGAAAAGACTCTaAAACcCCgTCCcATAGAgTACTGTGTAC          |
| Crema.WS247                                                                                                                                                                                     | Crema.WS247_Fam_22_12_15  | 15                  | 17               | 0.577591 | TaAGCCTAAGcC                                                          |
| Crema.WS247                                                                                                                                                                                     | Crema.WS247_Fam_23_71_14  | 14                  | 76               | 0.751350 | gGnGCTGAGCnAgGGGGGgGcGAGAGCAAGCTcCaGGGtGtCCTgTTTTaAgGTAATCACTACTTCCAG |
| Crema.WS247                                                                                                                                                                                     | Crema.WS247_Fam_24_92_13  | 13                  | 100              | 0.767009 |                                                                       |
| agTTCTTATCAAAAAGATAAGaaAATaaAaAcATAGGCCAATTgACACGCTGTGCTGGAGaaTTtAgTTtCTCCCTGCAGATATccTTAG                                                                                                      |                           |                     |                  |          |                                                                       |
| Crema.WS247                                                                                                                                                                                     | Crema.WS247_Fam_25_43_13  | 13                  | 43               | 0.875174 | CAGaAGAAaTGAAAACGATCAcTgATcGTTTTTGGAGATTCTg                           |
| Crema.WS247                                                                                                                                                                                     | Crema.WS247_Fam_26_14_13  | 13                  | 14               | 0.985348 | AGGGTCTAGGGTCT                                                        |
| Crema.WS247                                                                                                                                                                                     | Crema.WS247_Fam_27_11_13  | 13                  | 12               | 0.799145 | TTaCCGGtAAA                                                           |
| Crema.WS247                                                                                                                                                                                     | Crema.WS247_Fam_28_34_11  | 11                  | 35               | 0.706493 | GAAGTCGGAAGTCGGAAGTaaaATTTnttAtcCG                                    |
| Crema.WS247                                                                                                                                                                                     | Crema.WS247_Fam_29_180_10 | 10                  | 189              | 0.880854 |                                                                       |
| AGCAGTTTTTCaATGGTACGGAACcCAGgAAAACAGGGCACGAGAGCGTcATCCTTtTGGccATAATAGTATGAaACATGTcAGTTAAAATAgTcTAACCGTGCCTtCAGTcTCTaCAATTGAGGTCATTTGACCTTTTGAATTTCCAGTAAATCTAAGCAATACaGTGAAAAGT                 |                           |                     |                  |          |                                                                       |
| Crema.WS247                                                                                                                                                                                     | Crema.WS247_Fam_30_133_9  | 9                   | 136              | 0.726511 |                                                                       |
| TGGTAAATCCCGAAGGAcCCaACCCACCgcnTCCGCCAAATaACntATCTTgACTgaACGTCcctAAcaAActAnnTACTgAgAATcaAtncaaAAAGTGAAcagcctTcGAcAAGcATcCAAcTcAGCTA                                                             |                           |                     |                  |          |                                                                       |
| Crema.WS247                                                                                                                                                                                     | Crema.WS247_Fam_31_66_9   | 9                   | 66               | 0.971942 | ATTTTCAGATtTCCTCTTTCTTTCTTTTTTCTGATCTTCTGATATCCTCGAAAAGTGCCTGCGAC     |
| Crema.WS247                                                                                                                                                                                     | Crema.WS247_Fam_32_59_9   | 9                   | 62               | 0.710872 | cTTCtAGAAaCTtCtAGAnAAAcTTTTGAanTTcggCGGAATTCAAATATTCTaGAAC            |
| Crema.WS247                                                                                                                                                                                     | Crema.WS247_Fam_33_15_9   | 9                   | 17               | 0.711329 | ATTTcGAAACCGGAC                                                       |
| Crema.WS247                                                                                                                                                                                     | Crema.WS247_Fam_34_16_9   | 9                   | 16               | 0.914352 | ATCGGGTGCCAAAAn                                                       |
| Crema.WS247                                                                                                                                                                                     | Crema.WS247_Fam_35_10_9   | 9                   | 10               | 0.837037 | tTAATTTTTtA                                                           |
| Crema.WS247                                                                                                                                                                                     | Crema.WS247_Fam_36_161_8  | 8                   | 168              | 0.882370 |                                                                       |
| AGCGTGTTTTgTtTAGTATTTGTGCAAGTTTCAAGTCATTTGACCCAGGAATCTCTCTGATCGCAGTGATTCAGACTAATTGGTAGAgGCCAAAACGGGCATTTCCATAAcTTTTTTTTCTAGAAGAGCTATCGACAAACGCTAACTtGCATaAGAAC                                  |                           |                     |                  |          |                                                                       |

|                                                                                                                                                                                         |                          |   |     |          |                                                                          |
|-----------------------------------------------------------------------------------------------------------------------------------------------------------------------------------------|--------------------------|---|-----|----------|--------------------------------------------------------------------------|
| Crema.WS247                                                                                                                                                                             | Crema.WS247_Fam_37_132_8 | 8 | 138 | 0.681073 |                                                                          |
| tagtAGTTGTTgAgTTTGTgTcGgGATCGGTGAATCATcaAgTAGCGTTGGctnngcgttctTcgnancgCGCCAATAcTCAATTTGgTTCaTtCGAAAACGgTACaAATTTAGAGTTGGGTCACtATaAGT                                                    |                          |   |     |          |                                                                          |
| Crema.WS247                                                                                                                                                                             | Crema.WS247_Fam_38_21_8  | 8 | 22  | 0.658820 | TTCAACAAGTTGTgTtTnT                                                      |
| Crema.WS247                                                                                                                                                                             | Crema.WS247_Fam_39_20_8  | 8 | 22  | 0.584957 | TTTCTAGGCCatCantGagn                                                     |
| Crema.WS247                                                                                                                                                                             | Crema.WS247_Fam_40_20_8  | 8 | 21  | 0.740646 | TTGGTCTGCTAGCTCtAnA                                                      |
| Crema.WS247                                                                                                                                                                             | Crema.WS247_Fam_41_95_7  | 7 | 95  | 0.894403 |                                                                          |
| ATTTCAATTTTcTGATCAAAAACtGtctGCGAGAAAcGAATTTcAcGTTTTCGCCACTTTTTgAGCTTCATTTTTgACgAAATTCAAAATAcCTC                                                                                         |                          |   |     |          |                                                                          |
| Crema.WS247                                                                                                                                                                             | Crema.WS247_Fam_42_19_7  | 7 | 19  | 0.839599 | GGCCTCCGATTTtTtttATG                                                     |
| Crema.WS247                                                                                                                                                                             | Crema.WS247_Fam_43_13_7  | 7 | 14  | 0.853741 | AAAAAAAaTTTGA                                                            |
| Crema.WS247                                                                                                                                                                             | Crema.WS247_Fam_44_183_6 | 6 | 189 | 0.751088 |                                                                          |
| AtAATTTTanTgATTTCTAaccCGGGAGGATTCAAACCCGCGTCTACTGAAGTAaaCcTCAGCCCGGATAGTATAGACTCcttCacCcTCTGatCGaagtGtGTCTAACCGGtaCCGACACAGATAAGAATGGTGGGGGAAGTTAATTTcAtaaaaATAcCCTGTTTTtTaGgaATTTTaAtt |                          |   |     |          |                                                                          |
| Crema.WS247                                                                                                                                                                             | Crema.WS247_Fam_45_181_6 | 6 | 181 | 0.824800 |                                                                          |
| ATPCTTTTCTGTGTCGGATCCTGTAAGACTCGGTcAGTTACGTGCGAGTAGTCTTACCTAtGGGCTGTGTTTACTCACGGTAGACGCGGGATTGAATCCaCCCGGgATAGAATATTTTAGAAATTCATAAAAAGTATCAAAAAACAGtAtaatTtCGTtctttatgacttccaacacc      |                          |   |     |          |                                                                          |
| Crema.WS247                                                                                                                                                                             | Crema.WS247_Fam_46_50_6  | 6 | 53  | 0.787421 | TTCATaAAAAATATCCAAAAACAGGaTAATTTCTTTTCgTATATCAGAAT                       |
| Crema.WS247                                                                                                                                                                             | Crema.WS247_Fam_47_27_6  | 6 | 35  | 0.690159 | ACTTTTTTAGGCTTTcAGGCCGGCCCGG                                             |
| Crema.WS247                                                                                                                                                                             | Crema.WS247_Fam_48_21_6  | 6 | 23  | 0.547343 | GATTTACGGaAgcttTGtGtN                                                    |
| Crema.WS247                                                                                                                                                                             | Crema.WS247_Fam_49_194_5 | 5 | 194 | 0.953265 |                                                                          |
| TCTCTAAATATCTGTTCGTATTAcAGATACAGAAAAACGGTTTTcACCATTcGAaCGAGCATAtTTcTTACATCAGATTTCTATGGATTTCTAATTTcTcAcCGGTTAGTTTTTATTTaAAACCAAAAAAGTGTCTATTTCCACGCGACATCaTCA                            |                          |   |     |          |                                                                          |
| TTTCCTAgTTTTCCATACCTCGAAATATACAAA                                                                                                                                                       |                          |   |     |          |                                                                          |
| Crema.WS247                                                                                                                                                                             | Crema.WS247_Fam_50_191_5 | 5 | 192 | 0.916667 |                                                                          |
| TTTCTCTATCAATATGACCTAaTTTATAAAATTTCCgTgaAAAAATAAGCCGTAATAAAGGATGGCCGATGACgTAAAAGTTGGTCCATTTCTTgGGTTTGTCAAACGTTTTTTTCAACACATTTtCATTcGTAActGTGTCAGtTTTGGTcgGAGCGCA                        |                          |   |     |          |                                                                          |
| AAGATTTTTATAcCaATCGAAAGagctngTt                                                                                                                                                         |                          |   |     |          |                                                                          |
| Crema.WS247                                                                                                                                                                             | Crema.WS247_Fam_51_136_5 | 5 | 136 | 0.873529 |                                                                          |
| AGTGAATTTAGtCACAGGcACTCaCtGTTAGAGAACAGGATAATTCGAAGAACcgcCCTGAACATCACATTGGAGaAACCGTGTnCaAaATGTAattTatTgactGAcTATCTaATaAtAcCGAACTACaCa                                                    |                          |   |     |          |                                                                          |
| Crema.WS247                                                                                                                                                                             | Crema.WS247_Fam_52_103_5 | 5 | 106 | 0.821069 |                                                                          |
| TCGCGGTcTatCATcATGCCTTcTCCaTAAAATTATaAAAATTaTaaAaaaTacaTTAAgTTTATTAGggACAGGAgTGGAGTAcCaTgAGcGgATTGCAAT                                                                                  |                          |   |     |          |                                                                          |
| Crema.WS247                                                                                                                                                                             | Crema.WS247_Fam_53_62_5  | 5 | 66  | 0.783838 | CCaACCCATCaAGTCTTcGctTtCtCtGGCCAAAAaTAcgAGCGAGTTGGGAGTAAATACTC           |
| Crema.WS247                                                                                                                                                                             | Crema.WS247_Fam_54_45_5  | 5 | 45  | 0.976296 | GgCACTCTTTTACAGAGATTTTGGAAAATGGtTTAGAAAATGAGT                            |
| Crema.WS247                                                                                                                                                                             | Crema.WS247_Fam_55_44_5  | 5 | 44  | 0.927273 | AAAATGgGTAgTACCCATTTTCnAATCGAAACaGAAATCTgTG                              |
| Crema.WS247                                                                                                                                                                             | Crema.WS247_Fam_56_29_5  | 5 | 35  | 0.733333 | TCCGGATTCcGgAAAAATgAAAAttTTcAT                                           |
| Crema.WS247                                                                                                                                                                             | Crema.WS247_Fam_57_29_5  | 5 | 30  | 0.724444 | tACGAATTTAtAaTcgAAATtTcTcAAAAa                                           |
| Crema.WS247                                                                                                                                                                             | Crema.WS247_Fam_58_19_5  | 5 | 25  | 0.572000 | TTGGTCTGCTAntGTGaTt                                                      |
| Crema.WS247                                                                                                                                                                             | Crema.WS247_Fam_59_16_5  | 5 | 18  | 0.683333 | tGTCgcAGTTGCGAAn                                                         |
| Crema.WS247                                                                                                                                                                             | Crema.WS247_Fam_60_14_5  | 5 | 14  | 0.723810 | attACAcTGACaaA                                                           |
| Crema.WS247                                                                                                                                                                             | Crema.WS247_Fam_61_12_5  | 5 | 12  | 0.788889 | GctGgAGCTGgA                                                             |
| Crema.WS247                                                                                                                                                                             | Crema.WS247_Fam_62_222_4 | 4 | 223 | 0.811535 |                                                                          |
| TTCTgAtTAGAcACTACCTGATGCTGCATCGGtGTcACATGcGTAaccAACCATTCAGaTTTGGGTTTTcTcGAAAAAcAAAcTGcATTgAGAAATGCGtTattggctcGTgAGagcacAACTAcATAATTcTaATTTTAATCCATTTCTCCag                              |                          |   |     |          |                                                                          |
| ATaAATACAGCCAGGCCAAAGCAGCAACTCGATAGATTTACTCAttccaatcagattactc                                                                                                                           |                          |   |     |          |                                                                          |
| Crema.WS247                                                                                                                                                                             | Crema.WS247_Fam_63_179_4 | 4 | 179 | 0.939168 |                                                                          |
| CACGTAATAAAATgAATTCGGGTCAGGACGTGTAACGCTTTcTCATGATGATAGGGATgAACAAATACGAACAAAATGGTgTgTGGCGgTTTTGGGTTATCTATAcGAACCTCGAGaTCCAGGGCTCAAAGTTCCGTCcGTTctCAGATTTCCtTCAaa                         |                          |   |     |          |                                                                          |
| AAgtGCATTTGCAAACTGA                                                                                                                                                                     |                          |   |     |          |                                                                          |
| Crema.WS247                                                                                                                                                                             | Crema.WS247_Fam_64_136_4 | 4 | 137 | 0.783861 |                                                                          |
| cTCTaagTcTcaGgaAGCagTtCTATTcTctGtGAGTCTGTCTGTGTCTcGTCCaTCCGGATGTCcTaTTTCTTtCGGagACAGTTTCAGACGAaAtgaTgAGAAgGgAaATCcgTcTtTcGTgTGTACCATc                                                   |                          |   |     |          |                                                                          |
| Crema.WS247                                                                                                                                                                             | Crema.WS247_Fam_65_73_4  | 4 | 74  | 0.759009 | AAAACAAAAAaGtTTTGcCagAGTGGGgATCGAACcCTGGTTGTcAGATtGtACCaaaaaagtCaaaaaaca |
| Crema.WS247                                                                                                                                                                             | Crema.WS247_Fam_66_74_4  | 4 | 74  | 0.951952 |                                                                          |
| AAACTGTCTTGATGgGGGCTGAGGTCAGGTGTGCGGGTTcGGGcCTaTaGGAACAGCTTGcATTATGACCCcTAG                                                                                                             |                          |   |     |          |                                                                          |
| Crema.WS247                                                                                                                                                                             | Crema.WS247_Fam_67_65_4  | 4 | 65  | 0.952137 | TCATATTTATTTCCaTtTTCACTTaTTCATTTTCTATCTAATCTATGAAAAAGAGTATCCaCTTGT       |
| Crema.WS247                                                                                                                                                                             | Crema.WS247_Fam_68_41_4  | 4 | 42  | 0.844577 | AAAACGGGATAATTTTgAACAAATTTGAATTAAATCTctcA                                |
| Crema.WS247                                                                                                                                                                             | Crema.WS247_Fam_69_34_4  | 4 | 34  | 0.845588 | TAAAAACAGaAcATTTTCTATaAaATTGAgTTCc                                       |
| Crema.WS247                                                                                                                                                                             | Crema.WS247_Fam_70_33_4  | 4 | 33  | 0.973064 | ATATCACTATTGaCTTAATTTACTCGCTAGAAC                                        |
| Crema.WS247                                                                                                                                                                             | Crema.WS247_Fam_71_21_4  | 4 | 23  | 0.638889 | CGTAAATCgACattaGAAcnT                                                    |
| Crema.WS247                                                                                                                                                                             | Crema.WS247_Fam_72_23_4  | 4 | 23  | 0.623188 | AAAAaTAGtcaAntTTTTGGnTga                                                 |
| Crema.WS247                                                                                                                                                                             | Crema.WS247_Fam_73_21_4  | 4 | 22  | 0.679293 | TTgGtCaTGACCTAaTTaaT                                                     |
| Crema.WS247                                                                                                                                                                             | Crema.WS247_Fam_74_20_4  | 4 | 21  | 0.566138 | tTTgTcAGTGTaancATtt                                                      |
| Crema.WS247                                                                                                                                                                             | Crema.WS247_Fam_75_11_4  | 4 | 11  | 0.681818 | TTTCAGcaAnT                                                              |

|                                                                                                                                                                |                           |   |     |          |                                                                  |
|----------------------------------------------------------------------------------------------------------------------------------------------------------------|---------------------------|---|-----|----------|------------------------------------------------------------------|
| Crema.WS247                                                                                                                                                    | Crema.WS247_Fam_76_10_4   | 4 | 11  | 0.659091 | AttTCAgcCg                                                       |
| Crema.WS247                                                                                                                                                    | Crema.WS247_Fam_77_10_4   | 4 | 10  | 0.666667 | AaGAtaCTGa                                                       |
| Crema.WS247                                                                                                                                                    | Crema.WS247_Fam_78_174_3  | 3 | 174 | 0.943806 |                                                                  |
| TGgTATAAAAATCTTCaAGATCCGACAAAAACTGAGAAcGTTATAGAGAAACCGTTTTGGTAGTaaAGTTGGACGATCACTCAAAGTATGGCCATCTCTCATTGGAGCTTCATTTTtAtGAAAATTTTTCATCCAGGtCAtTTTGATAGAGGAGAA   |                           |   |     |          |                                                                  |
| TaCGGGCTTTCTcGA                                                                                                                                                |                           |   |     |          |                                                                  |
| Crema.WS247                                                                                                                                                    | Crema.WS247_Fam_79_171_3  | 3 | 173 | 0.822094 |                                                                  |
| TGTCATTTTCAGgtTTCTTTTTtCAAAaATATcAATTTTACGTgaCtAGAAgTaAAAAACATGTgAaaATTACAgATTTATGTCAAAAAGCAATcTAAAAcAGtCAaAATCgAcCaaATTTcGcNaaACGCGcCAaaGGTGGCCAGtcTcTctGCCTA |                           |   |     |          |                                                                  |
| CTgCTGAAAAA                                                                                                                                                    |                           |   |     |          |                                                                  |
| Crema.WS247                                                                                                                                                    | Crema.WS247_Fam_80_159_3  | 3 | 163 | 0.804363 |                                                                  |
| GCATTCGATCCCCATgTCCACcGGTATAGGGTTcTcTatGtgAGGAGCAGTAGGCTATCTaAGAATATGctGCCGGATGGATTTCGTTTGCcTATTcATTCAGgTTTCTGaatGAATCCTtaTAAATtcTccAgtTTtTaaAaGTCCCATTAaAcCT  |                           |   |     |          |                                                                  |
| Crema.WS247                                                                                                                                                    | Crema.WS247_Fam_81_99_3   | 3 | 99  | 0.955107 |                                                                  |
| CTGAATCAAGCTCCAcTGAACCATGTGTCACTGAAACAGAAAGACTTCTTCAaCTACTTCTTCAGTCACCGAgTcTAgCATTCTTACAGAATCTGTTT                                                             |                           |   |     |          |                                                                  |
| Crema.WS247                                                                                                                                                    | Crema.WS247_Fam_82_77_3   | 3 | 78  | 0.762108 |                                                                  |
| GGCTAGCAGGttTagGAtATTCTGanTtTCTGAaActAGCGAaACCACGTTCCGGgAGGTCCgtGACTgTatGACACA                                                                                 |                           |   |     |          |                                                                  |
| Crema.WS247                                                                                                                                                    | Crema.WS247_Fam_83_60_3   | 3 | 60  | 0.851852 | GGTGGATTCTGACCCgGgATTCAgaTATCCGTcACCTGATGTcGcTTGAttcCTTAGAAg     |
| Crema.WS247                                                                                                                                                    | Crema.WS247_Fam_84_40_3   | 3 | 40  | 0.933333 | AAACTGAGAcTcATTGACAGATAACCATATGAAAATGtCAG                        |
| Crema.WS247                                                                                                                                                    | Crema.WS247_Fam_85_35_3   | 3 | 35  | 0.758730 | CATAgACGGTaAGTtTATgaaTgAgtAaCAAAAC                               |
| Crema.WS247                                                                                                                                                    | Crema.WS247_Fam_86_31_3   | 3 | 31  | 0.971326 | GTAAGaAAATAGAAATCCATAGAAATCTGAT                                  |
| Crema.WS247                                                                                                                                                    | Crema.WS247_Fam_87_30_3   | 3 | 30  | 0.881481 | AGGATCAGTCCAcGAgGaGCCACaGCGCG                                    |
| Crema.WS247                                                                                                                                                    | Crema.WS247_Fam_88_22_3   | 3 | 23  | 0.782609 | tCTACAGTATcCCAgAATGaTA                                           |
| Crema.WS247                                                                                                                                                    | Crema.WS247_Fam_89_22_3   | 3 | 22  | 0.616162 | GATTTACngCaTnntcTGTGTc                                           |
| Crema.WS247                                                                                                                                                    | Crema.WS247_Fam_90_21_3   | 3 | 22  | 0.666667 | ntGTGGCCtAACTTTTntgAT                                            |
| Crema.WS247                                                                                                                                                    | Crema.WS247_Fam_91_19_3   | 3 | 21  | 0.640212 | AAAAATcGatGAAAtTTAn                                              |
| Crema.WS247                                                                                                                                                    | Crema.WS247_Fam_92_20_3   | 3 | 21  | 0.645503 | AnTcGAAAAtgAcTTTTTg                                              |
| Crema.WS247                                                                                                                                                    | Crema.WS247_Fam_93_21_3   | 3 | 21  | 0.703704 | GCTnAAAAtnCnCATTTTTGa                                            |
| Crema.WS247                                                                                                                                                    | Crema.WS247_Fam_94_20_3   | 3 | 20  | 1.000000 | GCACTTTTCTGTATTTCTTGT                                            |
| Crema.WS247                                                                                                                                                    | Crema.WS247_Fam_95_18_3   | 3 | 19  | 0.771930 | TCAcTTGCTATATTTGtC                                               |
| Crema.WS247                                                                                                                                                    | Crema.WS247_Fam_96_18_3   | 3 | 19  | 0.818713 | cGAAAAAAATcCGGAA                                                 |
| Crema.WS247                                                                                                                                                    | Crema.WS247_Fam_97_16_3   | 3 | 16  | 0.944444 | GGCCTAGAAAaCCGGT                                                 |
| Crema.WS247                                                                                                                                                    | Crema.WS247_Fam_98_14_3   | 3 | 15  | 0.651852 | ATTnTGAATcCTgA                                                   |
| Crema.WS247                                                                                                                                                    | Crema.WS247_Fam_99_15_3   | 3 | 15  | 0.851852 | GTAACcTCTGGAGTn                                                  |
| Crema.WS247                                                                                                                                                    | Crema.WS247_Fam_100_13_3  | 3 | 13  | 1.000000 | ACATTTTCTGAAT                                                    |
| Crema.WS247                                                                                                                                                    | Crema.WS247_Fam_101_183_2 | 2 | 183 | 0.948998 |                                                                  |
| AAATCTAATTTTCGGCCGTAAATTTGGTCTTCTGGTCATTTCTTTCTGCTTCTCTAAACAATACAGCTTTGTaGCTATGCGCAAAATGAAAGaCGTGTtCgTTTCcACTAATACAATTAcTTATCTGATTATAACTGTcATTCTaTGACTCAGACAAT |                           |   |     |          |                                                                  |
| CAATGAGACACAAAAACGGCTGA                                                                                                                                        |                           |   |     |          |                                                                  |
| Crema.WS247                                                                                                                                                    | Crema.WS247_Fam_102_159_2 | 2 | 159 | 0.895178 |                                                                  |
| AAGATGATCAGTTCTTAGTAACGCCGAGGCACGTTTCGGAACATCCATACGACCCGAAAAGtGAGTATGAAGaTACAAATAcCTACAGaaAACTAAACGATTTATTTcAaaATGAAaAaGaATCAACAAATgTTTTTTGTTGAaTGAAACTCGTTGGG |                           |   |     |          |                                                                  |
| Crema.WS247                                                                                                                                                    | Crema.WS247_Fam_103_153_2 | 2 | 153 | 0.642702 |                                                                  |
| TTTaCccAaTTTcgTTGCaTTTcAGTTGTGCGCGcGCaAAATATTCAaATTTTcCGTgcAAcAGCaAaTTTCCaATTTTCTGcCaTTTTCTGTCaACTTTTcCaCAGTaTTTcTTgTTGaaTTTAgAcTaaAaTCCgaaTAgAAAATCaAtaAA     |                           |   |     |          |                                                                  |
| Crema.WS247                                                                                                                                                    | Crema.WS247_Fam_104_88_2  | 2 | 88  | 0.628788 |                                                                  |
| TcAAAAATCtTaTTAAcTtaATTAGGgAcAGGaaTTGGAGgaaCATGaGacAgGACTGCACCTCGcGTCCTCCaaaCATGCCTcTcTCC                                                                      |                           |   |     |          |                                                                  |
| Crema.WS247                                                                                                                                                    | Crema.WS247_Fam_105_75_2  | 2 | 75  | 0.928889 |                                                                  |
| GAACTGCTTTGaACACTTGACGAAGTTTCTGTGCTGGAACCTTCGAGAGTTGTaGaaGtCACTGGGGTAGATTCA                                                                                    |                           |   |     |          |                                                                  |
| Crema.WS247                                                                                                                                                    | Crema.WS247_Fam_106_64_2  | 2 | 64  | 0.898438 | AAAAATGAAGCTGAAAAGTGGCGAAAATGTCAAAaTGATTTCTCGCGGAcAGTTTTTTGATcAt |
| Crema.WS247                                                                                                                                                    | Crema.WS247_Fam_107_50_2  | 2 | 50  | 0.840000 | CTTCGACGGGAgTCAACaGAAGTaTGGGTAGAAGTaCCTACCCCAAGa                 |
| Crema.WS247                                                                                                                                                    | Crema.WS247_Fam_108_49_2  | 2 | 49  | 0.717687 | TGGCCTAAaAACaTCAAAATtGGGAcTTCTAaGCCATCAAcacCCaAGg                |
| Crema.WS247                                                                                                                                                    | Crema.WS247_Fam_109_44_2  | 2 | 44  | 0.655303 | taCAGTAACCCGgATCCcAAaACccAAAAcTTGGATCaTaGgT                      |
| Crema.WS247                                                                                                                                                    | Crema.WS247_Fam_110_42_2  | 2 | 42  | 0.603175 | CAGCGCTAAAaaccATGaaGTcGaAcTTTgAACGCTGCTaAa                       |
| Crema.WS247                                                                                                                                                    | Crema.WS247_Fam_111_42_2  | 2 | 42  | 0.682540 | CTGTGCTAAAaAGCGcTAAAATccAAaaTAccAaAAaTTTAG                       |
| Crema.WS247                                                                                                                                                    | Crema.WS247_Fam_112_41_2  | 2 | 41  | 1.000000 | TTTTTTGGGGAAAAATTAGACTTTTTTgAGGGAAAAAATGCC                       |
| Crema.WS247                                                                                                                                                    | Crema.WS247_Fam_113_39_2  | 2 | 39  | 0.850427 | TTcCCTTAGTTGGATGATGGaCTCACCcCGAGACCTGt                           |
| Crema.WS247                                                                                                                                                    | Crema.WS247_Fam_114_39_2  | 2 | 39  | 0.863248 | GCTTCAGTGACGGCaaCAGTTGTGGTCTCCTCgCCGGAA                          |
| Crema.WS247                                                                                                                                                    | Crema.WS247_Fam_115_37_2  | 2 | 37  | 0.711712 | ATcCTGGATCCAGtTACAGTaACCCcCaAgATCTaAG                            |
| Crema.WS247                                                                                                                                                    | Crema.WS247_Fam_116_35_2  | 2 | 35  | 0.619048 | ACGCTGCGAGCTCACTAgCaacCTGcTaTcTTTaG                              |
| Crema.WS247                                                                                                                                                    | Crema.WS247_Fam_117_33_2  | 2 | 33  | 0.883838 | AGGTAGTCTaCTATTTTCGGTTTTTcTCATTTt                                |
| Crema.WS247                                                                                                                                                    | Crema.WS247_Fam_118_32_2  | 2 | 32  | 0.750000 | CAGCGCTAAAaCCGgaaTTTAGCGCTGGcTAG                                 |
| Crema.WS247                                                                                                                                                    | Crema.WS247_Fam_119_31_2  | 2 | 31  | 0.806452 | AAGAAAGAATGGTgGaGaaAGTCATaAAGAA                                  |

|                                                                                                                                                                   |                           |   |     |          |                                 |
|-------------------------------------------------------------------------------------------------------------------------------------------------------------------|---------------------------|---|-----|----------|---------------------------------|
| Crema.WS247                                                                                                                                                       | Crema.WS247_Fam_120_31_2  | 2 | 31  | 0.741935 | TGaCGGTTTTTCCAACtccCTGGGaTaCCgT |
| Crema.WS247                                                                                                                                                       | Crema.WS247_Fam_121_31_2  | 2 | 31  | 0.827957 | AAAACGGGATAATTTTGAACtAAATcTTAcA |
| Crema.WS247                                                                                                                                                       | Crema.WS247_Fam_122_30_2  | 2 | 30  | 0.666667 | AAaAAGGATCAaAAGAAACcGccgaAGAG   |
| Crema.WS247                                                                                                                                                       | Crema.WS247_Fam_123_26_2  | 2 | 26  | 0.769231 | GGAAaAtTTTGAAtTCCCCGCCAAAAC     |
| Crema.WS247                                                                                                                                                       | Crema.WS247_Fam_124_24_2  | 2 | 24  | 0.618056 | gTCgGAAAttTtCGAATcTTTTT         |
| Crema.WS247                                                                                                                                                       | Crema.WS247_Fam_125_22_2  | 2 | 22  | 0.621212 | CTTAGGCTTAgcAaATCTTagg          |
| Crema.WS247                                                                                                                                                       | Crema.WS247_Fam_126_22_2  | 2 | 22  | 0.704545 | CcAGaTTTAcAGCCTAAAATTa          |
| Crema.WS247                                                                                                                                                       | Crema.WS247_Fam_127_22_2  | 2 | 22  | 0.643939 | aACTCGAGCGTcAAaTaaTaa           |
| Crema.WS247                                                                                                                                                       | Crema.WS247_Fam_128_22_2  | 2 | 22  | 0.878788 | GCACTAGTCGTGTGCATTaTcA          |
| Crema.WS247                                                                                                                                                       | Crema.WS247_Fam_129_22_2  | 2 | 22  | 0.818182 | aAAGCCTaAAAaGTCCGGCCTA          |
| Crema.WS247                                                                                                                                                       | Crema.WS247_Fam_130_21_2  | 2 | 21  | 0.603175 | AAaACaCaCACcAaTTCCAac           |
| Crema.WS247                                                                                                                                                       | Crema.WS247_Fam_131_21_2  | 2 | 21  | 0.714286 | AAAaTaGGCTgAAAATTGcTC           |
| Crema.WS247                                                                                                                                                       | Crema.WS247_Fam_132_21_2  | 2 | 21  | 0.650794 | GAAAAtATCAAAaTTTaGAcT           |
| Crema.WS247                                                                                                                                                       | Crema.WS247_Fam_133_21_2  | 2 | 21  | 0.777778 | TAAATCTACATcTCAGcCCCG           |
| Crema.WS247                                                                                                                                                       | Crema.WS247_Fam_134_21_2  | 2 | 21  | 0.619048 | TcaTTTTagGCCaAATTTaAG           |
| Crema.WS247                                                                                                                                                       | Crema.WS247_Fam_135_20_2  | 2 | 20  | 0.666667 | GaTcaAAAAaCcTCGTTTTg            |
| Crema.WS247                                                                                                                                                       | Crema.WS247_Fam_136_19_2  | 2 | 19  | 1.000000 | TTCAAAGGACCTCGATATT             |
| Crema.WS247                                                                                                                                                       | Crema.WS247_Fam_137_19_2  | 2 | 19  | 0.789474 | caATGCACCATATTTGaGC             |
| Crema.WS247                                                                                                                                                       | Crema.WS247_Fam_138_18_2  | 2 | 18  | 0.925926 | AAAGATTCAAAAATTTTTTC            |
| Crema.WS247                                                                                                                                                       | Crema.WS247_Fam_139_18_2  | 2 | 18  | 0.629630 | AAaccCaTAAAaAcCTTA              |
| Crema.WS247                                                                                                                                                       | Crema.WS247_Fam_140_18_2  | 2 | 18  | 0.851852 | CTCATTTACTACCGaTTc              |
| Crema.WS247                                                                                                                                                       | Crema.WS247_Fam_141_17_2  | 2 | 17  | 0.607843 | AATTCcTaGAcTTTCGG               |
| Crema.WS247                                                                                                                                                       | Crema.WS247_Fam_142_17_2  | 2 | 17  | 1.000000 | TCAACTACAAAAATGTC               |
| Crema.WS247                                                                                                                                                       | Crema.WS247_Fam_143_16_2  | 2 | 16  | 0.625000 | tGACAGACaCACAgac                |
| Crema.WS247                                                                                                                                                       | Crema.WS247_Fam_144_16_2  | 2 | 16  | 0.666667 | AAtCTGActAATATAG                |
| Crema.WS247                                                                                                                                                       | Crema.WS247_Fam_145_16_2  | 2 | 16  | 0.666667 | AaAGCCTaAaAGCCTa                |
| Crema.WS247                                                                                                                                                       | Crema.WS247_Fam_146_14_2  | 2 | 14  | 0.714286 | TcTGTAaTcTGTAAG                 |
| Crema.WS247                                                                                                                                                       | Crema.WS247_Fam_147_14_2  | 2 | 14  | 0.904762 | CAGGCGCGGAGaTC                  |
| Crema.WS247                                                                                                                                                       | Crema.WS247_Fam_148_12_2  | 2 | 12  | 0.694444 | cCGGCGCTgGct                    |
| Crema.WS247                                                                                                                                                       | Crema.WS247_Fam_149_12_2  | 2 | 12  | 0.611111 | TaAcAATAaAAA                    |
| Crema.WS247                                                                                                                                                       | Crema.WS247_Fam_150_12_2  | 2 | 12  | 1.000000 | TCCCAGCATAA                     |
| Crema.WS247                                                                                                                                                       | Crema.WS247_Fam_151_11_2  | 2 | 11  | 0.893939 | CTATTTTAGGg                     |
| Crema.WS247                                                                                                                                                       | Crema.WS247_Fam_152_231_1 | 1 | 231 | 0.000000 |                                 |
| GATAGTCGAGATGAGATGGTGAACAAATCCAGTAATCTTCGATTTCACGATGGCTCGTCTTCTTCTCAGTTTCTCCACCACAACACTGGAACAACATGTTCTGGTAGCTTCTCATAGCTGAACTCGGATGGATAAGCGTTGACTTCGGTTGT          |                           |   |     |          |                                 |
| GAGAGGAATGTCGTGAATGTTGGAAGCAGGATGTCGAATCGAGTGGTCCGTCGTATTGTTCCGGAGATTG                                                                                            |                           |   |     |          |                                 |
| Crema.WS247                                                                                                                                                       | Crema.WS247_Fam_153_171_1 | 1 | 171 | 0.000000 |                                 |
| GTCGTAACCGCATAGGTAACCCAGGAAACCTGGAGAATGCATAAAACGCGGGCTGAGGTTTACTTCAGTAGAAATGAGTTTGAATCTTCTCGGTCTAGAAAACATAAGAAATAAAAGGAATTGGGATACTTTCTATTCTGACTTCTTCCCACCAT       |                           |   |     |          |                                 |
| TCTTACTCAGT                                                                                                                                                       |                           |   |     |          |                                 |
| Crema.WS247                                                                                                                                                       | Crema.WS247_Fam_154_170_1 | 1 | 170 | 0.000000 |                                 |
| AATCATCTCGACTAGATCAACGGAAATCGAGGTACGGTGTCAAAACCTCACAATCACCTGAGATTGAGATAAATGCGGCAAAGTCTGCACGTCGATTCAACCAATCAATTCGATGTTTCTATCGTATAACAATGGGAAAGAGTCCAACCTGATTAGAGAGG |                           |   |     |          |                                 |
| AGATTGGGAC                                                                                                                                                        |                           |   |     |          |                                 |
| Crema.WS247                                                                                                                                                       | Crema.WS247_Fam_155_160_1 | 1 | 160 | 0.000000 |                                 |
| ACGACAAAATGCACAGTAACTCCAGGAAACGTTTCTAGTGTCAAAAACCACTCATAAATCCAAATTTCTGTTAAAATTTTACCTCAGGCTTCTGTTTTTTCGAGATAACTAGTCATTTTGGGTTTCGGTAGCTCCAATACTGTGCATACACCATATCTT   |                           |   |     |          |                                 |
| Crema.WS247                                                                                                                                                       | Crema.WS247_Fam_156_157_1 | 1 | 157 | 0.000000 |                                 |
| TGGCCTAGAAAACCAAAATTAAGAAAACCTAGTCCCGGGTCATTTTTGACAGTTTTAGCTAGTTTTTTTGTGGTTTTTCTTGTGAAAATTGCGTTTTTTCATGATTTTTAGCCAATCAACAAGAAAAACAGCCGGGGACTAGTTTTTCGACAG         |                           |   |     |          |                                 |
| Crema.WS247                                                                                                                                                       | Crema.WS247_Fam_157_153_1 | 1 | 153 | 0.000000 |                                 |
| GAATACGATCTTAGAGCTTATTAGTCTTATGTTTTGAATTTGAAGAATGGAATTTGAGATTGAAGTACTAGACTTACTGTTGAGATTGAACAAAAATTGGAATTTGAGTTTGGTAACGAGGTTTGGAGTTGATTTTTGATATTT                  |                           |   |     |          |                                 |
| Crema.WS247                                                                                                                                                       | Crema.WS247_Fam_158_146_1 | 1 | 146 | 0.000000 |                                 |
| GTGGCCGAGTTTTTCACTTGTGGCTAGGAAACCAAAATTTGGGAAAACCTAGTCCCGGAGCTCCGATTTTAAATGAAAATAACGAATTTGAGCTGAAAAGTAAATGGGAAATTCGAAAAATCGCGGAAATCCGATTAGAAAAGGTG                |                           |   |     |          |                                 |
| Crema.WS247                                                                                                                                                       | Crema.WS247_Fam_159_141_1 | 1 | 141 | 0.000000 |                                 |
| CTCCTAAACGCATGAAACAGTAGACTGCAAGGAGCCTCTGATCCGGAGCAGTTCTAGTCACCACGCGTCCGAAAGACCTCTCGTAAGAGGTTCTCCGACTTCGCGAACATGGTTCGATTCCCTCAGTCCGGGCAGAACCAT                     |                           |   |     |          |                                 |
| Crema.WS247                                                                                                                                                       | Crema.WS247_Fam_160_134_1 | 1 | 134 | 0.000000 |                                 |
| ATTCACAAATTTGAATAAATTCATAAGAAACACCGTTTCTCATAAACTTTTGAATGATAGTTAATTTGACTGAAGGCGGTTGGTTCGCCGCTTCGGCTGGTACCGTAACCTGATGTTGATTGGTTATCATTAGTGA                          |                           |   |     |          |                                 |
| Crema.WS247                                                                                                                                                       | Crema.WS247_Fam_161_134_1 | 1 | 134 | 0.000000 |                                 |
| GACTAGTTTTTTTTCATAATTGGAATTTCTAGGCCACGTGTCGGAAAACCTCGGCCACGTACCACATTTGGTGGTTTTCTTGTCTTTTTGGCTCAGAAAACGATGAAAATGTCAAAAACCTGACTTTCTGAGATTGGG                        |                           |   |     |          |                                 |
| Crema.WS247                                                                                                                                                       | Crema.WS247_Fam_162_130_1 | 1 | 130 | 0.000000 |                                 |
| CGTGACTCCTCGTGGAAAAGTCGAAAATTTGAAATTTTGAATTTTGGAGTCGATTTTTTTCGGTTCGACGCTAAAACCTAGTAGTAACCAGTCCGAATTCATGAAAATAATCCATTTTGAATAATTCATGC                               |                           |   |     |          |                                 |

Crema.WS247 Crema.WS247\_Fam\_163\_128\_1 1 128 0.000000  
ATCAAGCAATTCAAATTTTCAGCAAGAAATCGGAAATAAGATAATTCAAATCGAAAGACAATCAGAAAATACAATAAGTGTTCTCTGGCTAGCATGCTAGCACCCACAACACTATACTGCACCTCATCTC  
Crema.WS247 Crema.WS247\_Fam\_164\_127\_1 1 127 0.000000  
GATCCTCTTACGAGAGGCTACGCACCGGTGTTAATCAGACAACCTCCGGATCAGAGGCTTCGCGCGTGTTCATGCGTATAGGAGTCAGTTCTGCACGCACAGAATATACAAAGAACAGACGGA  
Crema.WS247 Crema.WS247\_Fam\_165\_121\_1 1 121 0.000000  
CTTCTGACACCCGAATCGTTTCACATTTTTCCGACTTTTACGAGTTTTCTTTCCAAAAGCTACTCAATCCCGAAAAATCGATCTGGAAGGAGGATCATGGCGAATTTTCGGTTTTCCAG  
Crema.WS247 Crema.WS247\_Fam\_166\_116\_1 1 116 0.000000  
TAGAGACAATACACCTTGAAAGCACAGTCTTGGAAATTTCTCATTTAGACTTTTGTGAAACATCAACGGCTGTGCGGCTTGTTTAGTTTGAACGTTATTGGCTGAAAATGGCACAG  
Crema.WS247 Crema.WS247\_Fam\_167\_114\_1 1 114 0.000000  
ATCATTTTTGTAGTTGACATCTTTATTTAGTTCTAGAGGGAATAAGATAGGGACGCTTAACCTGCCAATGACTAGAAGATAAAAATGATTCTGAAACATTGGACATGTCTCCTTC  
Crema.WS247 Crema.WS247\_Fam\_168\_107\_1 1 107 0.000000  
TTATAGAGAAACCGTTTTGGTAGTAAAGTTGGACGATCAGTAAAGTGTGGCCATCTCTCATTTGGAGCTTCATTTTCAATGAAAATTTTTTAATCTAGGTCATTT  
Crema.WS247 Crema.WS247\_Fam\_169\_103\_1 1 103 0.000000  
CTCAAACTTCCAGATTTCTACACTTTTTTCATTCAAAAACCCGTTTTTTTTATTCCAATTTCCGCGAAAATCGCTAAAATTCATCCAAAATGGCCATTTTTTC  
Crema.WS247 Crema.WS247\_Fam\_170\_102\_1 1 102 0.000000  
AAAAATCAACTTTTTTGAATCAAAAATGGTCTAAAATCGAGGAGAATCGATTGAAAACGACTTGAATCGCTTAAGGAAGAATTTTTGACTGGAAAAAAGCG  
Crema.WS247 Crema.WS247\_Fam\_171\_102\_1 1 102 0.000000  
CGTATCAAGGAGTACTGGAGAGAGATATGCCGCTACGAGACCGAAGGATACGATTGATCGTCCAACCTGATTCCTTACTCCACCACAATCAATCGGTCAA  
Crema.WS247 Crema.WS247\_Fam\_172\_99\_1 1 99 0.000000  
CCAATCCCGAACCATCCGATTATCGATCGTCGCTTTCCCTTCCATCCCAACCATCCGAATTTCAATCGTGTGTCGTTCTTCTTATTCTCCA  
Crema.WS247 Crema.WS247\_Fam\_173\_96\_1 1 96 0.000000  
ACTCCAAAAGTAGCTCCTAAGAAGAAGGAATCATCGTCCGACGACTCCTCGGACGATGAGAAAAAAGCGTTTCGAAGCCAACACCAGTCAAGACC  
Crema.WS247 Crema.WS247\_Fam\_174\_81\_1 1 81 0.000000  
GTCCATCTGTGAGTGTCCAGATGTCCAACAAATGCGGATTTTTCCGTTCAAAAACAGCCAAATGAACAATTTTCAA  
Crema.WS247 Crema.WS247\_Fam\_175\_81\_1 1 81 0.000000  
GTTCCAGGAGTCGTTTTCACAGGACTCCACAGTGGTCTCACATGGTTCGGTTGGAGTAACTGGTGACGTAGAATTTCTCGCATT  
Crema.WS247 Crema.WS247\_Fam\_176\_73\_1 1 73 0.000000  
Crema.WS247 Crema.WS247\_Fam\_177\_71\_1 1 71 0.000000  
Crema.WS247 Crema.WS247\_Fam\_178\_70\_1 1 70 0.000000  
Crema.WS247 Crema.WS247\_Fam\_179\_66\_1 1 66 0.000000  
Crema.WS247 Crema.WS247\_Fam\_180\_63\_1 1 63 0.000000  
Crema.WS247 Crema.WS247\_Fam\_181\_63\_1 1 63 0.000000  
Crema.WS247 Crema.WS247\_Fam\_182\_63\_1 1 63 0.000000  
Crema.WS247 Crema.WS247\_Fam\_183\_63\_1 1 63 0.000000  
Crema.WS247 Crema.WS247\_Fam\_184\_62\_1 1 62 0.000000  
Crema.WS247 Crema.WS247\_Fam\_185\_60\_1 1 60 0.000000  
Crema.WS247 Crema.WS247\_Fam\_186\_60\_1 1 60 0.000000  
Crema.WS247 Crema.WS247\_Fam\_187\_59\_1 1 59 0.000000  
Crema.WS247 Crema.WS247\_Fam\_188\_58\_1 1 58 0.000000  
Crema.WS247 Crema.WS247\_Fam\_189\_57\_1 1 57 0.000000  
Crema.WS247 Crema.WS247\_Fam\_190\_54\_1 1 54 0.000000  
Crema.WS247 Crema.WS247\_Fam\_191\_54\_1 1 54 0.000000  
Crema.WS247 Crema.WS247\_Fam\_192\_51\_1 1 51 0.000000  
Crema.WS247 Crema.WS247\_Fam\_193\_50\_1 1 50 0.000000  
Crema.WS247 Crema.WS247\_Fam\_194\_50\_1 1 50 0.000000  
Crema.WS247 Crema.WS247\_Fam\_195\_48\_1 1 48 0.000000  
Crema.WS247 Crema.WS247\_Fam\_196\_48\_1 1 48 0.000000  
Crema.WS247 Crema.WS247\_Fam\_197\_48\_1 1 48 0.000000  
Crema.WS247 Crema.WS247\_Fam\_198\_48\_1 1 48 0.000000  
Crema.WS247 Crema.WS247\_Fam\_199\_47\_1 1 47 0.000000  
Crema.WS247 Crema.WS247\_Fam\_200\_47\_1 1 47 0.000000  
Crema.WS247 Crema.WS247\_Fam\_201\_46\_1 1 46 0.000000  
Crema.WS247 Crema.WS247\_Fam\_202\_46\_1 1 46 0.000000  
Crema.WS247 Crema.WS247\_Fam\_203\_43\_1 1 43 0.000000  
Crema.WS247 Crema.WS247\_Fam\_204\_42\_1 1 42 0.000000  
Crema.WS247 Crema.WS247\_Fam\_205\_42\_1 1 42 0.000000  
Crema.WS247 Crema.WS247\_Fam\_206\_42\_1 1 42 0.000000  
AAGATATATCCCGTCCAGCTATCCTCCGTTTGTGCTACTAAAATGCTGTGCTGGCTTCGGTTTGTCTAGTATA  
TTCTTAGGCCACAAAACCTGTTATTTTCAGCCAAAATAACCTGATTTTCGGCTAGTGGCTAACTTTGGG  
TGAATGAGTAATAGAACCCATAGACGGTAAAGCATGACTGTCTAACAAAACCCATATACGGTAAATAA  
GAGTACTGTAGGTGGAGTCGGAGACAGAACACTGAGGATCCTGATGTTGTTGAATCTGCTGATA  
TCGGATGGGTTTGGTCTAGATAAAAAGTGTACCCGATTCCTATTCTTACCTCAGGATTCATCT  
TTTTTAGGTGAAAAAATGCGATTTTCAGCCATTTTCGAAAGAAAAATCTCACAAAACGTCAA  
TTTTTGTTTTGTTTTCTATGGTTCGGAGGGTGTGGATTTCGATCCCCACCCACACAAAACCTT  
AATCTGGCGTGTCTTTAACCGGTTTCAGCTATGAAAAGCCGAAATTTCTGTGTTTTCTTCA  
TGGCGTGTCTTTGGCGGTTTTAAAGTGAAAAATGGTCTGATTTAGCAAAAATTCAAAAT  
AGCTTAGAAAAGTTTTTTCGTTGACAGACTTAACCGGTGCATGTTCACTGCCGAGTAGGC  
GGATCCCGAGGAGCTCAGAACTGAGCAAAAATTTGATGATCAATAAGCAACTGGCAATTA  
CGTAAATCTACACAAGGATCGGGATACTGTAGCGGTGAATTTGGCTGTGCTGATTTACGCT  
AGGCGCGCCAGCTATCTAGCAATCAATTTTCAGAAAAATTCCTTAGAAAACGCGTGAA  
TGACCTAGAAAACCTCAACTGGAAAAGTTAGGCCACTGTCAATTCCTTTGGGATTTGG  
GGATCCCGAGGAGCTCAGAACTGAGGAGGAGTCCCTAAAGAAGCCAGAGGAGC  
ACTACAGAAAATGAACATGTTCAAAATCTGTAGTTTAAAGGAGAAAGCCACGTGG  
AGGAGCCCCACTTGACGCGGAGGAAAGGTGGTGAAGGAGGCAACGAGGAGC  
ACCGGTTTTTCTCGTAAAAATCACAAAATTTGTGTCTAGGGCGGCTCCG  
GACGCGTTTTTATCAGATAAAACTGATTTTTTGAATCTGGCGTACCTTC  
TGCTTGCTTCGGCTTTTCGGCCTAGGCTTGTGCAATTTACATCGACC  
GGTGGCCTAGAAAATCCAGAAATGCGGAAAACCTAGGCCACGGTCTATTT  
GAGGACAAGGACCAGACTTCGGACCGTCCGGTGTATTTACAGACCGTA  
TCAGCTTCTTCTGGCTTTGGCTTCAAGATCCTTCTTAGCCTGTGCA  
ACGCGACCGCAACCGGTGCGAGTTATGGCCCAAGTTAGCAGCCGCG  
TGGTGGCCTTAGGCGCTCTAGTGGGAGAGGAGGGGAGGCACAGGGT  
TTTAGGCCAATTTTTCAGCGGGGACTAGTTTCTCGAAAATTTGGGT  
TCGAAAATGGTTGATAACAATTCGTTTCAATTTTCACTTACATC  
GGTTACTGTACTCAGGATCCGAAAATTTTGGATTTTCCAACAAA  
ACTGGCTCCAGTCGCGCTCTTCTCCTTGGCAAGTCGAAGC  
GACAAGCTGGAATTCAAATTAACCTCATCCACCAGTTCCAA  
CCACGGAATCTACCAGTACATCGACCGAGTCTACCAGTACTT

|             |                          |   |    |          |                                              |
|-------------|--------------------------|---|----|----------|----------------------------------------------|
| Crema.WS247 | Crema.WS247_Fam_207_42_1 | 1 | 42 | 0.000000 | CGGAGAGCGGGATGGGGCCGATTCTGACGATCCTGAGGTTG    |
| Crema.WS247 | Crema.WS247_Fam_208_42_1 | 1 | 42 | 0.000000 | GACGCGTTTTACATAGAAATAGTGGTTATCTGGGGCACCTTC   |
| Crema.WS247 | Crema.WS247_Fam_209_42_1 | 1 | 42 | 0.000000 | AAAAATGCTCGAGATCCGTCCTCAAAACTGACTGAGTTCTGATG |
| Crema.WS247 | Crema.WS247_Fam_210_42_1 | 1 | 42 | 0.000000 | CGCGTTTTGATGACTTTTGAGAAATGATCTGGCGTCTGTGG    |
| Crema.WS247 | Crema.WS247_Fam_211_42_1 | 1 | 42 | 0.000000 | GGAATAAAATCGCGAGATCGGAACCCAGAGTACTGAAAAAG    |
| Crema.WS247 | Crema.WS247_Fam_212_41_1 | 1 | 41 | 0.000000 | TCCGAGAATCGGATATCCGACTTTTTCTCCGAAAAGAAAAG    |
| Crema.WS247 | Crema.WS247_Fam_213_41_1 | 1 | 41 | 0.000000 | AAAAACGCGTCACAGGTGCCCCGATTACCTTTTTTTGTCA     |
| Crema.WS247 | Crema.WS247_Fam_214_40_1 | 1 | 40 | 0.000000 | TCCGGATGTCCACGAGTTTTGTCTGTGTGTCTGTCTGTTTTG   |
| Crema.WS247 | Crema.WS247_Fam_215_40_1 | 1 | 40 | 0.000000 | CCCCCCGAAAAAAAATTTTCGGGAACAAAGCGGAGACA       |
| Crema.WS247 | Crema.WS247_Fam_216_40_1 | 1 | 40 | 0.000000 | TTTAGCGCTGACTAGCAGCGCTAAAAACGAAAATGGACT      |
| Crema.WS247 | Crema.WS247_Fam_217_40_1 | 1 | 40 | 0.000000 | ACACGCCAGATTTCCGGTTTTTCAGAAAAACGCGCCAAAA     |
| Crema.WS247 | Crema.WS247_Fam_218_40_1 | 1 | 40 | 0.000000 | TTTGATATTTTGAGTTTGGTAACGAGTTTGAGAGTTGAT      |
| Crema.WS247 | Crema.WS247_Fam_219_40_1 | 1 | 40 | 0.000000 | ATTTTTGGCTCAAAATCAGAACTTCTAGCTCACAAACAAG     |
| Crema.WS247 | Crema.WS247_Fam_220_40_1 | 1 | 40 | 0.000000 | ATTTTGGTCTGAAAATGGATTTTGGACCTAAAAATCACCC     |
| Crema.WS247 | Crema.WS247_Fam_221_39_1 | 1 | 39 | 0.000000 | ACATTACTTCAATCATATTTGATCCTTTGCCCTTAGTT       |
| Crema.WS247 | Crema.WS247_Fam_222_39_1 | 1 | 39 | 0.000000 | AGACTACTGTAGGTTACGGCAATTGCTACAGTAACCCGG      |
| Crema.WS247 | Crema.WS247_Fam_223_38_1 | 1 | 38 | 0.000000 | AAACCTGGAGCTTGCTTTAGCCCCGCCATAGGCTTC         |
| Crema.WS247 | Crema.WS247_Fam_224_38_1 | 1 | 38 | 0.000000 | ACCTTTGACGCGCTTCTACTTTTTGACGATCTGGCGC        |
| Crema.WS247 | Crema.WS247_Fam_225_37_1 | 1 | 37 | 0.000000 | TTAGGCTCCGCCTTCTGAAAAAGAGGGTGGGGCTAA         |
| Crema.WS247 | Crema.WS247_Fam_226_36_1 | 1 | 36 | 0.000000 | GGGTACTGTAGCCTCAGGATCCTAATTTTTGGATG          |
| Crema.WS247 | Crema.WS247_Fam_227_36_1 | 1 | 36 | 0.000000 | ACCAAGGAGCCGAGACTCCAAAAGTGAAGCGCGAC          |
| Crema.WS247 | Crema.WS247_Fam_228_36_1 | 1 | 36 | 0.000000 | GCTACAGTACCACATATCCTATGTATTCGGCTCCT          |
| Crema.WS247 | Crema.WS247_Fam_229_36_1 | 1 | 36 | 0.000000 | TTCCGTCATTTTTGAGATTTGGTCCAAGTGGTCT           |
| Crema.WS247 | Crema.WS247_Fam_230_35_1 | 1 | 35 | 0.000000 | TCTGATTTGACGTTACGATATTGAGAAGAGAAAATT         |
| Crema.WS247 | Crema.WS247_Fam_231_34_1 | 1 | 34 | 0.000000 | GAGATGAAAATGAAAATGGTTGTCAATCATTTTC           |
| Crema.WS247 | Crema.WS247_Fam_232_34_1 | 1 | 34 | 0.000000 | GAAATTTTTGTAGCCGGTAAATCATGCTGAGTGA           |
| Crema.WS247 | Crema.WS247_Fam_233_33_1 | 1 | 33 | 0.000000 | GGGGCGGAGCTTCACTACTACTATAAGCCTAAG            |
| Crema.WS247 | Crema.WS247_Fam_234_33_1 | 1 | 33 | 0.000000 | CAGTAGAGCGCAATTGCACAATTCGAAAATTAG            |
| Crema.WS247 | Crema.WS247_Fam_235_33_1 | 1 | 33 | 0.000000 | CAAGGAGGATCCGGAGGATACGCTGGAGCTGGA            |
| Crema.WS247 | Crema.WS247_Fam_236_33_1 | 1 | 33 | 0.000000 | GAGTCCCTCAGTTTGAGACAATGTGCTCCAG              |
| Crema.WS247 | Crema.WS247_Fam_237_33_1 | 1 | 33 | 0.000000 | AGCAGCTTGTTCGGCTGGAATCTCTTGAACCTGG           |
| Crema.WS247 | Crema.WS247_Fam_238_32_1 | 1 | 32 | 0.000000 | TCTGCTGTCTGTGTGTCTGTCTCATTCCCGATG            |
| Crema.WS247 | Crema.WS247_Fam_239_31_1 | 1 | 31 | 0.000000 | GGACCCAACTCGAGTGTGGCAACTCCAAAA               |
| Crema.WS247 | Crema.WS247_Fam_240_31_1 | 1 | 31 | 0.000000 | GGGCGGAGTTTGTGCCAAAATACGGAAAAAT              |
| Crema.WS247 | Crema.WS247_Fam_241_31_1 | 1 | 31 | 0.000000 | TGTCATTTCTGACTGAAATTAGCTCAGAATT              |
| Crema.WS247 | Crema.WS247_Fam_242_31_1 | 1 | 31 | 0.000000 | TACGCTGCGAGTTTGCAAGCATTTTGAAAAA              |
| Crema.WS247 | Crema.WS247_Fam_243_31_1 | 1 | 31 | 0.000000 | TTTTTCATCGATTTTTGATGGGAAAAATCGGGG            |
| Crema.WS247 | Crema.WS247_Fam_244_31_1 | 1 | 31 | 0.000000 | TTTCAGCTTTTTTGACTCAAACCTTCTCGGT              |
| Crema.WS247 | Crema.WS247_Fam_245_31_1 | 1 | 31 | 0.000000 | AAACTTGAAAAAATACCATTTTTGAGCCCAA              |
| Crema.WS247 | Crema.WS247_Fam_246_30_1 | 1 | 30 | 0.000000 | ATGAAATATCATGTTTTTGGATATTTTTTA               |
| Crema.WS247 | Crema.WS247_Fam_247_30_1 | 1 | 30 | 0.000000 | CGAGGAGCTCAGAACTGAGGAGGAGAGCA                |
| Crema.WS247 | Crema.WS247_Fam_248_30_1 | 1 | 30 | 0.000000 | TATTGGTTAAAAATAGGTTAATAAACAGTAA              |
| Crema.WS247 | Crema.WS247_Fam_249_30_1 | 1 | 30 | 0.000000 | AGTCTACAGTAACCCAGAACTTGAGGAGG                |
| Crema.WS247 | Crema.WS247_Fam_250_30_1 | 1 | 30 | 0.000000 | CTCCAGAATCCTCCAGAAGACGTCACGACA               |
| Crema.WS247 | Crema.WS247_Fam_251_30_1 | 1 | 30 | 0.000000 | CTGGAGCTGGTGTGGAGTCTCTTCGGCTA                |
| Crema.WS247 | Crema.WS247_Fam_252_29_1 | 1 | 29 | 0.000000 | TCCGCCCACTTTAAGGTTCTTTTTATGA                 |
| Crema.WS247 | Crema.WS247_Fam_253_29_1 | 1 | 29 | 0.000000 | AGCTGCTTAATTACTATCCAATCGTATGG                |
| Crema.WS247 | Crema.WS247_Fam_254_29_1 | 1 | 29 | 0.000000 | TCCGGTTCGGGATTCGGATGAAATTTTTT                |
| Crema.WS247 | Crema.WS247_Fam_255_29_1 | 1 | 29 | 0.000000 | TTAAGCAGCTGCACATGGATGAATGCTAA                |
| Crema.WS247 | Crema.WS247_Fam_256_29_1 | 1 | 29 | 0.000000 | GTTTTCAAAACGTCCTTTTTCTCAAAAAACG              |
| Crema.WS247 | Crema.WS247_Fam_257_29_1 | 1 | 29 | 0.000000 | GTGGATTTACGGAGCTAAATGTCTTATAT                |
| Crema.WS247 | Crema.WS247_Fam_258_27_1 | 1 | 27 | 0.000000 | GGAGCCCCAGGACCAGCTGGACCAAAG                  |
| Crema.WS247 | Crema.WS247_Fam_259_27_1 | 1 | 27 | 0.000000 | GTACCAGGAGTACCACCTCCTCCAGTA                  |
| Crema.WS247 | Crema.WS247_Fam_260_27_1 | 1 | 27 | 0.000000 | TGATAGCGATGATAGCGATGATAGCGA                  |
| Crema.WS247 | Crema.WS247_Fam_261_27_1 | 1 | 27 | 0.000000 | TTCTCATTAGAGCGCACGTCGCATCGG                  |
| Crema.WS247 | Crema.WS247_Fam_262_27_1 | 1 | 27 | 0.000000 | TACAGTAACCCAGTCAAGATTTAGAAC                  |
| Crema.WS247 | Crema.WS247_Fam_263_27_1 | 1 | 27 | 0.000000 | TGTATGGTCTGTGGTTCCACCAGTGG                   |

|             |                          |   |    |          |                              |
|-------------|--------------------------|---|----|----------|------------------------------|
| Crema.WS247 | Crema.WS247_Fam_264_27_1 | 1 | 27 | 0.000000 | GAAATCCGGCGCCCGGGGCCATCCTC   |
| Crema.WS247 | Crema.WS247_Fam_265_26_1 | 1 | 26 | 0.000000 | AACTTTTTTCGAAAAGTTTAGACCGGAA |
| Crema.WS247 | Crema.WS247_Fam_266_25_1 | 1 | 25 | 0.000000 | TCTTTCTCTCTTTTTTTCATTATTT    |
| Crema.WS247 | Crema.WS247_Fam_267_25_1 | 1 | 25 | 0.000000 | TTCCGACTTCCGGGCGTTTTTTCAC    |
| Crema.WS247 | Crema.WS247_Fam_268_25_1 | 1 | 25 | 0.000000 | ATCTAGGCTCCGCCACTTAGAGAC     |
| Crema.WS247 | Crema.WS247_Fam_269_25_1 | 1 | 25 | 0.000000 | TTTCTCTTCCACGGCCACCACGGGA    |
| Crema.WS247 | Crema.WS247_Fam_270_24_1 | 1 | 24 | 0.000000 | AGTCTCGAAGACCAAGTCTCGCCA     |
| Crema.WS247 | Crema.WS247_Fam_271_24_1 | 1 | 24 | 0.000000 | GCCTACAACCGTTACAACACTACTGA   |
| Crema.WS247 | Crema.WS247_Fam_272_24_1 | 1 | 24 | 0.000000 | ACGGAAGCTCCGACGACTTCAACT     |
| Crema.WS247 | Crema.WS247_Fam_273_24_1 | 1 | 24 | 0.000000 | AAGAAGAGGAGGGAGAGCAGAAGA     |
| Crema.WS247 | Crema.WS247_Fam_274_24_1 | 1 | 24 | 0.000000 | GATCCTAGAGACTACTGTAACTCC     |
| Crema.WS247 | Crema.WS247_Fam_275_24_1 | 1 | 24 | 0.000000 | ATGTACCCTTGATCATCTCACAG      |
| Crema.WS247 | Crema.WS247_Fam_276_24_1 | 1 | 24 | 0.000000 | TCCTTCTTGTCTTGGCTGCGAGA      |
| Crema.WS247 | Crema.WS247_Fam_277_24_1 | 1 | 24 | 0.000000 | TCCTTCTTAGCCTTGTCTCATCAGCC   |
| Crema.WS247 | Crema.WS247_Fam_278_23_1 | 1 | 23 | 0.000000 | CACAAGTTGTGTTTTTGTACTATC     |
| Crema.WS247 | Crema.WS247_Fam_279_23_1 | 1 | 23 | 0.000000 | AGTCCGCCCACTATGACCCCTT       |
| Crema.WS247 | Crema.WS247_Fam_280_23_1 | 1 | 23 | 0.000000 | TTTAGGCTTAGAAGCTCCGCCTC      |
| Crema.WS247 | Crema.WS247_Fam_281_23_1 | 1 | 23 | 0.000000 | TCTAAAAATTTACAGAAAAATCA      |
| Crema.WS247 | Crema.WS247_Fam_282_23_1 | 1 | 23 | 0.000000 | TTTTGAGTTGATTTAATCATGA       |
| Crema.WS247 | Crema.WS247_Fam_283_22_1 | 1 | 22 | 0.000000 | TACTGTAGTGAATCCCAAGGAA       |
| Crema.WS247 | Crema.WS247_Fam_284_22_1 | 1 | 22 | 0.000000 | TTACTACTGACAATCACCGAAGC      |
| Crema.WS247 | Crema.WS247_Fam_285_22_1 | 1 | 22 | 0.000000 | AAACTGTTGTCCCCTTGAGTAT       |
| Crema.WS247 | Crema.WS247_Fam_286_22_1 | 1 | 22 | 0.000000 | TCAATGCACCATATAGTAATGG       |
| Crema.WS247 | Crema.WS247_Fam_287_21_1 | 1 | 21 | 0.000000 | CGTTTTCAGCTCAAATTTTCT        |
| Crema.WS247 | Crema.WS247_Fam_288_21_1 | 1 | 21 | 0.000000 | CATGAATTTTGTAGTCGAAAAA       |
| Crema.WS247 | Crema.WS247_Fam_289_21_1 | 1 | 21 | 0.000000 | AGTTCGGCCACCAGGAGAGAA        |
| Crema.WS247 | Crema.WS247_Fam_290_21_1 | 1 | 21 | 0.000000 | AAAGTGACGTCATTTTCAGAGA       |
| Crema.WS247 | Crema.WS247_Fam_291_21_1 | 1 | 21 | 0.000000 | AGGTGAAAAATCAAATTTTAT        |
| Crema.WS247 | Crema.WS247_Fam_292_21_1 | 1 | 21 | 0.000000 | TACAGTGACAATTTCAAAGAT        |
| Crema.WS247 | Crema.WS247_Fam_293_21_1 | 1 | 21 | 0.000000 | ACCAGTACCTCGACTGAATCC        |
| Crema.WS247 | Crema.WS247_Fam_294_21_1 | 1 | 21 | 0.000000 | AAGATTACTGTAGATGACCAG        |
| Crema.WS247 | Crema.WS247_Fam_295_21_1 | 1 | 21 | 0.000000 | CGGTCGCAGTTTTCGCTAGAC        |
| Crema.WS247 | Crema.WS247_Fam_296_21_1 | 1 | 21 | 0.000000 | CTGGAACCCCTGATCTGACC         |
| Crema.WS247 | Crema.WS247_Fam_297_21_1 | 1 | 21 | 0.000000 | TAAGCAGCTCCCAACGAGCCC        |
| Crema.WS247 | Crema.WS247_Fam_298_21_1 | 1 | 21 | 0.000000 | CACAAGTTGTAGCCAATAAAA        |
| Crema.WS247 | Crema.WS247_Fam_299_21_1 | 1 | 21 | 0.000000 | GGCTGAGCTTGTTTCGAAAAG        |
| Crema.WS247 | Crema.WS247_Fam_300_21_1 | 1 | 21 | 0.000000 | ACTTCTGGTACTGGACCATCT        |
| Crema.WS247 | Crema.WS247_Fam_301_20_1 | 1 | 20 | 0.000000 | TGGAAGTTCTTTCGAAAT           |
| Crema.WS247 | Crema.WS247_Fam_302_20_1 | 1 | 20 | 0.000000 | GTCGATTTACGGAGCTCGG          |
| Crema.WS247 | Crema.WS247_Fam_303_20_1 | 1 | 20 | 0.000000 | ACTCAACTTTTGGCAATGCC         |
| Crema.WS247 | Crema.WS247_Fam_304_20_1 | 1 | 20 | 0.000000 | ATAGGTCCCCACATCCAATA         |
| Crema.WS247 | Crema.WS247_Fam_305_20_1 | 1 | 20 | 0.000000 | GGTGGCCTAGTTTCCCAATA         |
| Crema.WS247 | Crema.WS247_Fam_306_20_1 | 1 | 20 | 0.000000 | ACGCCTAAAATGAGCCTGAA         |
| Crema.WS247 | Crema.WS247_Fam_307_20_1 | 1 | 20 | 0.000000 | GGAAAAAGCTTAAATTTGAT         |
| Crema.WS247 | Crema.WS247_Fam_308_20_1 | 1 | 20 | 0.000000 | TGTCGCTTTTTTCGAAGATG         |
| Crema.WS247 | Crema.WS247_Fam_309_20_1 | 1 | 20 | 0.000000 | CAGTAATCTAGGAATATCTA         |
| Crema.WS247 | Crema.WS247_Fam_310_20_1 | 1 | 20 | 0.000000 | TTCATTCGCTGCGGCTCAT          |
| Crema.WS247 | Crema.WS247_Fam_311_20_1 | 1 | 20 | 0.000000 | CATCAGACAGATTCTCGGC          |
| Crema.WS247 | Crema.WS247_Fam_312_20_1 | 1 | 20 | 0.000000 | TGCGTCAAAAAGTACGCCGC         |
| Crema.WS247 | Crema.WS247_Fam_313_20_1 | 1 | 20 | 0.000000 | ACCTCAAAAATTTGGGCTGAG        |
| Crema.WS247 | Crema.WS247_Fam_314_20_1 | 1 | 20 | 0.000000 | GCTCACTAGAGCGTCAAAA          |
| Crema.WS247 | Crema.WS247_Fam_315_19_1 | 1 | 19 | 0.000000 | ACGGGGTTTTAAGAAATAG          |
| Crema.WS247 | Crema.WS247_Fam_316_19_1 | 1 | 19 | 0.000000 | GAACGGTCCCAAGGAATTA          |
| Crema.WS247 | Crema.WS247_Fam_317_19_1 | 1 | 19 | 0.000000 | GAATGGTCCCAACCCGAAA          |
| Crema.WS247 | Crema.WS247_Fam_318_19_1 | 1 | 19 | 0.000000 | ATTCTCTTTTTTTTTTCTC          |
| Crema.WS247 | Crema.WS247_Fam_319_19_1 | 1 | 19 | 0.000000 | TAGAGTACCATTACATCAC          |
| Crema.WS247 | Crema.WS247_Fam_320_19_1 | 1 | 19 | 0.000000 | TCTTCTTAACCTTCTTCTC          |

|             |                          |   |    |          |                    |
|-------------|--------------------------|---|----|----------|--------------------|
| Crema.WS247 | Crema.WS247_Fam_321_18_1 | 1 | 18 | 0.000000 | GGATACGGTGGATATGGA |
| Crema.WS247 | Crema.WS247_Fam_322_18_1 | 1 | 18 | 0.000000 | CCTTCCAATCCAGGAACT |
| Crema.WS247 | Crema.WS247_Fam_323_18_1 | 1 | 18 | 0.000000 | CTCTCCTGTTTTTAGTCC |
| Crema.WS247 | Crema.WS247_Fam_324_18_1 | 1 | 18 | 0.000000 | GATTTCCAGGACGATCAG |
| Crema.WS247 | Crema.WS247_Fam_325_18_1 | 1 | 18 | 0.000000 | GGCGGAGCTTGTGAGGG  |
| Crema.WS247 | Crema.WS247_Fam_326_18_1 | 1 | 18 | 0.000000 | GCCAAGTACAGTGACCAC |
| Crema.WS247 | Crema.WS247_Fam_327_18_1 | 1 | 18 | 0.000000 | TAGAATCGCTAGCATCGC |
| Crema.WS247 | Crema.WS247_Fam_328_17_1 | 1 | 17 | 0.000000 | TCGAGTCTCGTCTGGCC  |
| Crema.WS247 | Crema.WS247_Fam_329_17_1 | 1 | 17 | 0.000000 | CTCTTTGACTACACTTG  |
| Crema.WS247 | Crema.WS247_Fam_330_16_1 | 1 | 16 | 0.000000 | TTAGGCTTAGCTGATC   |
| Crema.WS247 | Crema.WS247_Fam_331_16_1 | 1 | 16 | 0.000000 | TGCGAGTTTTTGGGTT   |
| Crema.WS247 | Crema.WS247_Fam_332_16_1 | 1 | 16 | 0.000000 | CGGGTTGAATCCTCC    |
| Crema.WS247 | Crema.WS247_Fam_333_16_1 | 1 | 16 | 0.000000 | TCGGAGGGTCGGAGGA   |
| Crema.WS247 | Crema.WS247_Fam_334_15_1 | 1 | 15 | 0.000000 | TATCAGTTATCACTT    |
| Crema.WS247 | Crema.WS247_Fam_335_15_1 | 1 | 15 | 0.000000 | CAGTGCAACCGAAAT    |
| Crema.WS247 | Crema.WS247_Fam_336_15_1 | 1 | 15 | 0.000000 | CATTTCGGCACCAAC    |
| Crema.WS247 | Crema.WS247_Fam_337_15_1 | 1 | 15 | 0.000000 | AATCTGAATCTTCAG    |
| Crema.WS247 | Crema.WS247_Fam_338_15_1 | 1 | 15 | 0.000000 | GATTACTGTATCTGG    |
| Crema.WS247 | Crema.WS247_Fam_339_15_1 | 1 | 15 | 0.000000 | GATAAGGAAGCAAAT    |
| Crema.WS247 | Crema.WS247_Fam_340_15_1 | 1 | 15 | 0.000000 | CGAAAAATTTTGAGG    |
| Crema.WS247 | Crema.WS247_Fam_341_14_1 | 1 | 14 | 0.000000 | AAGTTAGGCCACCA     |
| Crema.WS247 | Crema.WS247_Fam_342_14_1 | 1 | 14 | 0.000000 | CCCATTCTAATTGT     |
| Crema.WS247 | Crema.WS247_Fam_343_11_1 | 1 | 11 | 0.000000 | TATCGTAATCC        |
| Crema.WS247 | Crema.WS247_Fam_344_11_1 | 1 | 11 | 0.000000 | GACCACGATTC        |
| Crema.WS247 | Crema.WS247_Fam_345_10_1 | 1 | 10 | 0.000000 | CGAGACTCAA         |
| Crema.WS247 | Crema.WS247_Fam_346_10_1 | 1 | 10 | 0.000000 | ATTCTGTGC          |
| Crema.WS247 | Crema.WS247_Fam_347_10_1 | 1 | 10 | 0.000000 | TCGCTATCTT         |



# M. hapla

| Genome                                                                                                                                                              | Family name               | Number of sequences | Alignment length | Score    | Consensus without gaps                                             |
|---------------------------------------------------------------------------------------------------------------------------------------------------------------------|---------------------------|---------------------|------------------|----------|--------------------------------------------------------------------|
| Mhapla.WS247                                                                                                                                                        | Mhapla.WS247_Fam_1_17_42  | 42                  | 18               | 0.747688 | GAATAnTGAAGCAGGtg                                                  |
| Mhapla.WS247                                                                                                                                                        | Mhapla.WS247_Fam_2_24_30  | 30                  | 24               | 0.947893 | CAGTCCGTTTCAGTGTcGtTCAACTT                                         |
| Mhapla.WS247                                                                                                                                                        | Mhapla.WS247_Fam_3_19_17  | 17                  | 24               | 0.721763 | TGTCAATCAAAcCaTGtTACC                                              |
| Mhapla.WS247                                                                                                                                                        | Mhapla.WS247_Fam_4_14_16  | 16                  | 24               | 0.348322 | ATTAAaATTAANA                                                      |
| Mhapla.WS247                                                                                                                                                        | Mhapla.WS247_Fam_5_39_13  | 13                  | 42               | 0.781237 | TGCGTGCTGGACTGCACtaAAGGCAGCAGCATCaACAnA                            |
| Mhapla.WS247                                                                                                                                                        | Mhapla.WS247_Fam_6_21_13  | 13                  | 31               | 0.466915 | TTCAcaCTACcnnATGTTCCc                                              |
| Mhapla.WS247                                                                                                                                                        | Mhapla.WS247_Fam_7_16_11  | 11                  | 16               | 0.863636 | CCAAGgTTTAAAGGC                                                    |
| Mhapla.WS247                                                                                                                                                        | Mhapla.WS247_Fam_8_182_9  | 9                   | 183              | 0.811374 |                                                                    |
| ATAGGCCATATATGACAGAAAAAATTAAAGAAATTTTATCGTTTAGAAACGGatTTATAGGCCTAGAanTTTTcAAtnCaaAAATTTTCaTtTgaAactTCAGAGTCTCTGACTCAAAAGGCAATATCTCTGCCAAAAATGCGgAAAccTaTnTTGAAAA    |                           |                     |                  |          |                                                                    |
| TtTgagAtATTTTAgAnAAGAT                                                                                                                                              |                           |                     |                  |          |                                                                    |
| Mhapla.WS247                                                                                                                                                        | Mhapla.WS247_Fam_9_61_8   | 8                   | 62               | 0.802035 | CTGCATTAtgGGATGGATGCaAaTCTCGGCCCTTCGGCCCTCgAACCaACTCATTTACTT       |
| Mhapla.WS247                                                                                                                                                        | Mhapla.WS247_Fam_10_12_8  | 8                   | 13               | 0.673077 | aAaTtATTTTTA                                                       |
| Mhapla.WS247                                                                                                                                                        | Mhapla.WS247_Fam_11_169_7 | 7                   | 177              | 0.716348 |                                                                    |
| GaCCTATAAAAAATGCTTTGAGacGATAaAATTTCTTtATTTTTTCTtCAAAGaTgGATtAGAGTCTTATcTACaatATCCaAAATTTTgAGAtAGgttTcCGCATgTTTGGatGAGATATaGcTTTAGAGTCTGaTgTatcagaAAtttTCTccgAAA     |                           |                     |                  |          |                                                                    |
| AAcTtCtTAG                                                                                                                                                          |                           |                     |                  |          |                                                                    |
| Mhapla.WS247                                                                                                                                                        | Mhapla.WS247_Fam_12_62_7  | 7                   | 88               | 0.509109 | aAAAAATCAATAAAATCGATATATcGATTTTTcAAAAtTTGTaAAAAATTTTTcaAAAAATCgATA |
| Mhapla.WS247                                                                                                                                                        | Mhapla.WS247_Fam_13_55_7  | 7                   | 57               | 0.788917 | CTGGCTAGATGGAGgGCTTcgTnGTGCTcCAGTATGGACAGgGGGATtATTGCn             |
| Mhapla.WS247                                                                                                                                                        | Mhapla.WS247_Fam_14_37_7  | 7                   | 37               | 0.747748 | TTcGgACTAgAaAGTAGGCTGGAagGAACATGTTCCc                              |
| Mhapla.WS247                                                                                                                                                        | Mhapla.WS247_Fam_15_180_6 | 6                   | 185              | 0.814114 |                                                                    |
| TTCAGAGTTACCTGACTCTAAAGGCcATAACTCAGCCAAAAATGCTAAAATCTCCTTGAAATTTTgAGATATCTTAGATAAGATGTAgAtCTATATTGATACAAAAATCAAGAAAtGTTATCGATTTAAACATTTTTATAGGCCaTAGAAgTTTTgAT      |                           |                     |                  |          |                                                                    |
| AggAGaAGAACAATtTAAT                                                                                                                                                 |                           |                     |                  |          |                                                                    |
| Mhapla.WS247                                                                                                                                                        | Mhapla.WS247_Fam_16_21_6  | 6                   | 21               | 0.919577 | ATATTCTGGTCAGTTCtGATc                                              |
| Mhapla.WS247                                                                                                                                                        | Mhapla.WS247_Fam_17_14_6  | 6                   | 18               | 0.588272 | naAATCTGATTTTT                                                     |
| Mhapla.WS247                                                                                                                                                        | Mhapla.WS247_Fam_18_177_5 | 5                   | 184              | 0.770833 |                                                                    |
| TCTAAaGGcATAACTCATCCAAAAATATtAATATCTCCTTGAATTTTtGgGACATCTTAGAtAAGATaTAgAtCTATaTtTAgCcAAAAATaaagAGctgAGacATaCcGaAAAAATTTTTATAGGGCCTAgAatTTTTaaTAGAGaatTCATAtAa       |                           |                     |                  |          |                                                                    |
| tttnaaggtctcnagac                                                                                                                                                   |                           |                     |                  |          |                                                                    |
| Mhapla.WS247                                                                                                                                                        | Mhapla.WS247_Fam_19_20_5  | 5                   | 25               | 0.433333 | AAtnTtctAAAantATAataa                                              |
| Mhapla.WS247                                                                                                                                                        | Mhapla.WS247_Fam_20_20_5  | 5                   | 20               | 0.853333 | AaTTgTAAGaATTTaTAAAT                                               |
| Mhapla.WS247                                                                                                                                                        | Mhapla.WS247_Fam_21_180_4 | 4                   | 186              | 0.742234 |                                                                    |
| aAaATTTTCGAGGTaaccGACTCTAaaaTCAATATCaGAAAAATTCCTCCTACgAtTttaaTgtAaaTTTGGGATATtGTAggtAAGAcATTcaTccATCTATaaCAAAAAATtAagAAATTTCACTTTCAAaTTTTGATTTaTaGGgTTTTGAAGaT      |                           |                     |                  |          |                                                                    |
| tTtATTAGGCTaAAAtaatt                                                                                                                                                |                           |                     |                  |          |                                                                    |
| Mhapla.WS247                                                                                                                                                        | Mhapla.WS247_Fam_22_177_4 | 4                   | 177              | 0.893283 |                                                                    |
| CgTAAATaGGCACAAACaTaCTAATaAaCGTAACCTTAAAGCGTTATAACGCgAaTTCTAGCGTTTAAATcTCTTAGtAAATtGgGATATtTTAGAgAAGACTaTAATcAGaATTTATTCAAAAAATTAgaAAGATCTAAACCaCCAAATTTTTGTAAATC   |                           |                     |                  |          |                                                                    |
| GTTACTGAAGTTTTTAG                                                                                                                                                   |                           |                     |                  |          |                                                                    |
| Mhapla.WS247                                                                                                                                                        | Mhapla.WS247_Fam_23_158_4 | 4                   | 158              | 0.992968 |                                                                    |
| AAAATTTTTCGTTCAATTCAAAAATGTCAAAAAATTTTCATGAAATTCcATTCCGatTGAATTTTTTAAAAATTTATAGAAATCAAAATATTTTTATGATATTTATTTTGCCAATGAGTTCGGCAAGATAATTCTATAAGAATTTCTAGAAATTTCAAAGAAA |                           |                     |                  |          |                                                                    |
| Mhapla.WS247                                                                                                                                                        | Mhapla.WS247_Fam_24_88_4  | 4                   | 88               | 0.929293 |                                                                    |
| GAGGAAACCAcTGAATTCtaTTTTATCaGaAATATgTAGTCTAGAACGTTAAAAATTTAaTcGAAATTTTTTAGAaaCTGAAGACAAAT                                                                           |                           |                     |                  |          |                                                                    |
| Mhapla.WS247                                                                                                                                                        | Mhapla.WS247_Fam_25_59_4  | 4                   | 61               | 0.819672 | GCAGCCCTACTGACGCTTTTGTcAGGGGCaTaATTCaTGGTGGcttgTgcTCAATGGTG        |
| Mhapla.WS247                                                                                                                                                        | Mhapla.WS247_Fam_26_40_4  | 4                   | 40               | 0.966667 | TTAATCATTATCTCTATTCAACGGATAATAGGGcTAAAT                            |
| Mhapla.WS247                                                                                                                                                        | Mhapla.WS247_Fam_27_31_4  | 4                   | 32               | 0.828125 | TTCAATTATTCaaCtTGTTTcAcTTgCCTTGC                                   |
| Mhapla.WS247                                                                                                                                                        | Mhapla.WS247_Fam_28_32_4  | 4                   | 32               | 0.958333 | AGgGaCAGGACTCTAATGGTPTTTTAACTTAA                                   |
| Mhapla.WS247                                                                                                                                                        | Mhapla.WS247_Fam_29_23_4  | 4                   | 24               | 0.817130 | AAAGCAACCGAgGCTcCCCGGgAc                                           |
| Mhapla.WS247                                                                                                                                                        | Mhapla.WS247_Fam_30_19_4  | 4                   | 22               | 0.545455 | AAgTTTATTtTtaTaaTTc                                                |
| Mhapla.WS247                                                                                                                                                        | Mhapla.WS247_Fam_31_18_4  | 4                   | 18               | 0.702160 | tTagagAGaGGGTAAATTA                                                |
| Mhapla.WS247                                                                                                                                                        | Mhapla.WS247_Fam_32_11_4  | 4                   | 14               | 0.551587 | AAAnAAcACAA                                                        |
| Mhapla.WS247                                                                                                                                                        | Mhapla.WS247_Fam_33_11_4  | 4                   | 11               | 0.898990 | AGAATTACTCt                                                        |
| Mhapla.WS247                                                                                                                                                        | Mhapla.WS247_Fam_34_78_3  | 3                   | 87               | 0.837803 |                                                                    |
| TCGTCCAATTTGTATAGAAGAGCCtTCTTCGACAGTTGTGGAGTATTATGTCGTCGATTTcTCAAGCTTcAGAC                                                                                          |                           |                     |                  |          |                                                                    |
| Mhapla.WS247                                                                                                                                                        | Mhapla.WS247_Fam_35_86_3  | 3                   | 86               | 0.886305 |                                                                    |
| CATAAATGAACAATAATATAAAATtaAtTgGccTAGTcTATGAATTATcTTACAAAAATAATATCTTCTAATAAAATTAaAGtCg                                                                               |                           |                     |                  |          |                                                                    |

|                                                                                                   |                          |   |    |          |                                                                          |
|---------------------------------------------------------------------------------------------------|--------------------------|---|----|----------|--------------------------------------------------------------------------|
| Mhapla.WS247                                                                                      | Mhapla.WS247_Fam_36_84_3 | 3 | 84 | 1.000000 |                                                                          |
| CCTCGAAGATGGGATTTGTTTATAGGATCCATTTCGATTTTGGGGTTTTATATTTAAAAATCATCCATGAAATAACCGGTA AAAAC           |                          |   |    |          |                                                                          |
| Mhapla.WS247                                                                                      | Mhapla.WS247_Fam_37_74_3 | 3 | 74 | 0.963964 |                                                                          |
| ATGATTtAAGATAGATTAGATATtTTAGGgCCAAATAAATAGAAAGAGATTAGAATGATAATGACCATAAGAAGA                       |                          |   |    |          |                                                                          |
| Mhapla.WS247                                                                                      | Mhapla.WS247_Fam_38_68_3 | 3 | 69 | 0.906602 | TTAGAGTCTtATCTACAATATCCCAAATTTTGAgggAGGTTTCCGCATGTTTGAaGAGATATAgCC       |
| Mhapla.WS247                                                                                      | Mhapla.WS247_Fam_39_62_3 | 3 | 68 | 0.846405 | TAATTTTGA AAAACAAATTTTAAACACATcCTcTAATAATAAATTACAATTCGGtAAAGCATTTT       |
| Mhapla.WS247                                                                                      | Mhapla.WS247_Fam_40_64_3 | 3 | 64 | 0.798611 | TGTATATCAATTATCAATATTTTTTaaATTaaAGGTATAAATATCAATGTAtgttatcaaaaa          |
| Mhapla.WS247                                                                                      | Mhapla.WS247_Fam_41_56_3 | 3 | 56 | 0.984127 | CAAAATaTATTATGGCATTTTTGCCCTCTTCGGTGGCCATAAAAAATTTTTCTGTTTTGc             |
| Mhapla.WS247                                                                                      | Mhapla.WS247_Fam_42_34_3 | 3 | 34 | 0.947712 | TGCCCCATGCCCTCAATCGGcTTGCgGGTCTTTCC                                      |
| Mhapla.WS247                                                                                      | Mhapla.WS247_Fam_43_28_3 | 3 | 28 | 0.611111 | AAATaAatAcAAATATCAgaaTTaATTTa                                            |
| Mhapla.WS247                                                                                      | Mhapla.WS247_Fam_44_21_3 | 3 | 27 | 0.588477 | AaGGTGctGTTGtGTgGTAG                                                     |
| Mhapla.WS247                                                                                      | Mhapla.WS247_Fam_45_26_3 | 3 | 26 | 0.803419 | AtTgACGTGGCgCAGGGCTCCaGCag                                               |
| Mhapla.WS247                                                                                      | Mhapla.WS247_Fam_46_26_3 | 3 | 26 | 0.965812 | AAAAATCAGAATTTTTTCTGATTTTA                                               |
| Mhapla.WS247                                                                                      | Mhapla.WS247_Fam_47_22_3 | 3 | 22 | 0.712121 | TATTTTTGTATTTTTntAannt                                                   |
| Mhapla.WS247                                                                                      | Mhapla.WS247_Fam_48_22_3 | 3 | 22 | 0.656566 | GGGATAAGtGGgAAnGnTAagg                                                   |
| Mhapla.WS247                                                                                      | Mhapla.WS247_Fam_49_22_3 | 3 | 22 | 0.878788 | ATACTGTAgAttTAAAGCCGG                                                    |
| Mhapla.WS247                                                                                      | Mhapla.WS247_Fam_50_18_3 | 3 | 20 | 0.727778 | ntTTTTATAGGCCTAGAA                                                       |
| Mhapla.WS247                                                                                      | Mhapla.WS247_Fam_51_20_3 | 3 | 20 | 1.000000 | AAGTTGCGTTATAACGCTTT                                                     |
| Mhapla.WS247                                                                                      | Mhapla.WS247_Fam_52_18_3 | 3 | 18 | 0.901235 | GCCACCATTGAAcCACaA                                                       |
| Mhapla.WS247                                                                                      | Mhapla.WS247_Fam_53_18_3 | 3 | 18 | 0.901235 | CCCATCtgAACGCTGAAA                                                       |
| Mhapla.WS247                                                                                      | Mhapla.WS247_Fam_54_16_3 | 3 | 17 | 0.650327 | TTTTAATTTnAttCTg                                                         |
| Mhapla.WS247                                                                                      | Mhapla.WS247_Fam_55_16_3 | 3 | 17 | 0.647059 | ATtGTAAAcTTaTTt                                                          |
| Mhapla.WS247                                                                                      | Mhapla.WS247_Fam_56_15_3 | 3 | 16 | 0.701389 | AAACaAGTTTTnAaA                                                          |
| Mhapla.WS247                                                                                      | Mhapla.WS247_Fam_57_15_3 | 3 | 16 | 0.729167 | AtAaTTTTAAgCTTT                                                          |
| Mhapla.WS247                                                                                      | Mhapla.WS247_Fam_58_16_3 | 3 | 16 | 1.000000 | TTAAGATAAAGCATT                                                          |
| Mhapla.WS247                                                                                      | Mhapla.WS247_Fam_59_11_3 | 3 | 11 | 0.848485 | AtAATTTAATt                                                              |
| Mhapla.WS247                                                                                      | Mhapla.WS247_Fam_60_95_2 | 2 | 95 | 0.901754 |                                                                          |
| ATCCCATCGAATAAAAGGGaaaATTgATCGATGAATGAAGTTCATGTATGAATTAGTATGACCTTCATgATCAACTTTTtCaATTTCTAGAAATa   |                          |   |    |          |                                                                          |
| Mhapla.WS247                                                                                      | Mhapla.WS247_Fam_61_94_2 | 2 | 94 | 0.702128 |                                                                          |
| AGATTTTATTAATAAAATTATATTTTTTAAAAATAATACGAGGTAATAAATAAAAAATACTAAACACTTTATAaattttatcttcgagggtaaattt |                          |   |    |          |                                                                          |
| Mhapla.WS247                                                                                      | Mhapla.WS247_Fam_62_89_2 | 2 | 89 | 1.000000 |                                                                          |
| GAATAGACGATAAAATTGCAGTCGTTAAGTAGTAGATTTAAATAAATTTGTCTCATAGAACTAATGATTAGTACTAATGATAAATTTAC         |                          |   |    |          |                                                                          |
| Mhapla.WS247                                                                                      | Mhapla.WS247_Fam_63_78_2 | 2 | 78 | 0.965812 |                                                                          |
| TTAATAATAAGTTAAACATTAGAAGCCTAGTTAATATATTTACTTTTTTCTGATTCTGTTTCATTAGATACTGgTAAc                    |                          |   |    |          |                                                                          |
| Mhapla.WS247                                                                                      | Mhapla.WS247_Fam_64_76_2 | 2 | 76 | 0.929825 |                                                                          |
| CAGTGCaAATGCcTACCTAGGATTTCTAGATTTTTaTCTATGACAATTTCTTCAATTATTAGGACATATATAGTG                       |                          |   |    |          |                                                                          |
| Mhapla.WS247                                                                                      | Mhapla.WS247_Fam_65_76_2 | 2 | 76 | 0.929825 |                                                                          |
| GTTTATACAATTCATATATATTTgGTAGAATTAGATCTCTATATAGAACAaATCAtaACTTGTAGCTTcCaACTTC                      |                          |   |    |          |                                                                          |
| Mhapla.WS247                                                                                      | Mhapla.WS247_Fam_66_72_2 | 2 | 72 | 0.953704 | CAAGTGATATAATAAAATTAAGTGAGATAaATGAGGGTTCTTAAGcCCAAGAGCTAAGCAAGACTCGTTTTT |
| Mhapla.WS247                                                                                      | Mhapla.WS247_Fam_67_67_2 | 2 | 67 | 1.000000 | AGAATAATTTTCGACAAGCAATAAGTGCTAACCTAAAGATAATGGCACTTTCTGATTTATCAAAAATC     |
| Mhapla.WS247                                                                                      | Mhapla.WS247_Fam_68_66_2 | 2 | 66 | 1.000000 | TAATTTTTTACAATTTCTGCGGTAGCAATACTTAAGTTTTTTTTTTCTTCGACAAGTTTACAATTG       |
| Mhapla.WS247                                                                                      | Mhapla.WS247_Fam_69_62_2 | 2 | 62 | 0.956989 | AAATTTTAGATAaaACGTTACATAAACCGGAAATCTATTTCGcGAACTTTGATTACTAACCT           |
| Mhapla.WS247                                                                                      | Mhapla.WS247_Fam_70_62_2 | 2 | 62 | 0.935484 | CGCAAGGAGGACGAAGACAATGACGCTTCTAAATGATGaATAAAAGaCGTTATAAATTAGGa           |
| Mhapla.WS247                                                                                      | Mhapla.WS247_Fam_71_60_2 | 2 | 60 | 0.822222 | GGCTTCGGCCAACTGCCAGAGGGGGtctTCTTTCTCTcTTCcCCCCTGCAAGCAGaT                |
| Mhapla.WS247                                                                                      | Mhapla.WS247_Fam_72_60_2 | 2 | 60 | 0.955556 | GATGGTTTCAGCAGAAGTTCTCTCTTCTTGTCCaTGCTCCGAGACGAGAAGACTTTTTT              |
| Mhapla.WS247                                                                                      | Mhapla.WS247_Fam_73_57_2 | 2 | 57 | 0.859649 | TATAAgGCACTGTAGaAAATcTTCTACTAActTAAACgTtTACCgGTTTGCCATGGC                |
| Mhapla.WS247                                                                                      | Mhapla.WS247_Fam_74_54_2 | 2 | 54 | 1.000000 | AATATCTGGCTTTCAGCCTTTTTATGAAGCTGCTTCTCTCTGGAAGCTTCAA                     |
| Mhapla.WS247                                                                                      | Mhapla.WS247_Fam_75_54_2 | 2 | 54 | 1.000000 | ATACATAGACCCTCAGGAATCTATGTATTTTCGGTATATTTCTAACGATTACAAA                  |
| Mhapla.WS247                                                                                      | Mhapla.WS247_Fam_76_53_2 | 2 | 53 | 1.000000 | TTTTATATAATTAAGATTTTCTTCTATATTTAAAAATATATTTAAGTTTGA                      |
| Mhapla.WS247                                                                                      | Mhapla.WS247_Fam_77_48_2 | 2 | 48 | 0.833333 | CGAAAGCTTATGCGTGCCaAAATCAATaCCTGCTAAAAATCAAAaCTa                         |
| Mhapla.WS247                                                                                      | Mhapla.WS247_Fam_78_48_2 | 2 | 48 | 0.916667 | TTCCTTGCCCTTGCTTcATTATTTCCaCCTGTTTCATaATTCAACTTGc                        |
| Mhapla.WS247                                                                                      | Mhapla.WS247_Fam_79_42_2 | 2 | 42 | 0.603175 | TTTACAATTTGTA AAAAGTTTTTaAttaAAgCTTTTaaTTATaA                            |
| Mhapla.WS247                                                                                      | Mhapla.WS247_Fam_80_42_2 | 2 | 42 | 0.888889 | CAGTAATTTTGAAGCATGCTTcAaAaTTTTTGTAACATGaTT                               |
| Mhapla.WS247                                                                                      | Mhapla.WS247_Fam_81_42_2 | 2 | 42 | 1.000000 | GAAAATAATATATAATCAGTTAGTACAAAATTCGTA CTAACA                              |
| Mhapla.WS247                                                                                      | Mhapla.WS247_Fam_82_41_2 | 2 | 41 | 1.000000 | TCTTAATTTTAATTTATTTAAATAAAAAACATATCTTCTCTC                               |
| Mhapla.WS247                                                                                      | Mhapla.WS247_Fam_83_40_2 | 2 | 40 | 0.608333 | TAATTaagAAATAtaTTCCGGA AAACaCAtaCTaAaATtt                                |
| Mhapla.WS247                                                                                      | Mhapla.WS247_Fam_84_40_2 | 2 | 40 | 0.800000 | CCTATaTTGAaAATCTGagATATTTTAgATaAGATATAGg                                 |

|                                                                                                                                                                 |                            |   |     |          |                                       |
|-----------------------------------------------------------------------------------------------------------------------------------------------------------------|----------------------------|---|-----|----------|---------------------------------------|
| Mhapla.WS247                                                                                                                                                    | Mhapla.WS247_Fam_85_37_2   | 2 | 37  | 0.639640 | ATTCTGaTTTTaatGtTTTAAaAaaTGTTTTaATTTA |
| Mhapla.WS247                                                                                                                                                    | Mhapla.WS247_Fam_86_37_2   | 2 | 37  | 0.639640 | GAAAcaTTATTaTAtTTAAATaAAAaAaTTTTaCG   |
| Mhapla.WS247                                                                                                                                                    | Mhapla.WS247_Fam_87_36_2   | 2 | 36  | 0.611111 | AAATCAGAATTTCaTgCAaACAgTaaTgAAAtaAgA  |
| Mhapla.WS247                                                                                                                                                    | Mhapla.WS247_Fam_88_36_2   | 2 | 36  | 0.962963 | TTAACTTTTTcCGAAAATACATTTCTGAAATTAATCT |
| Mhapla.WS247                                                                                                                                                    | Mhapla.WS247_Fam_89_33_2   | 2 | 33  | 0.621212 | tTTTTGcTatTTTTcTATTTTTcACAAAaCaGAa    |
| Mhapla.WS247                                                                                                                                                    | Mhapla.WS247_Fam_90_33_2   | 2 | 33  | 1.000000 | ATCAGAATTTAAAACAACTGTAGAAAAATAAAT     |
| Mhapla.WS247                                                                                                                                                    | Mhapla.WS247_Fam_91_32_2   | 2 | 32  | 0.656250 | ttTTCCGGAAAaTaaTTaAAAaTAATCTGAC       |
| Mhapla.WS247                                                                                                                                                    | Mhapla.WS247_Fam_92_32_2   | 2 | 32  | 0.666667 | aTACAAcCtTCCGGaAAATATTaTaaTTAAa       |
| Mhapla.WS247                                                                                                                                                    | Mhapla.WS247_Fam_93_32_2   | 2 | 32  | 1.000000 | TTACCGAACGAACGGGCAGGAAGAAATCTCCC      |
| Mhapla.WS247                                                                                                                                                    | Mhapla.WS247_Fam_94_31_2   | 2 | 31  | 0.612903 | TACAAaTTGTAAAAaaTTTaTTAaTAAaac        |
| Mhapla.WS247                                                                                                                                                    | Mhapla.WS247_Fam_95_30_2   | 2 | 30  | 1.000000 | ATAATTTAAAAAATTTTACTAATTTTTTAA        |
| Mhapla.WS247                                                                                                                                                    | Mhapla.WS247_Fam_96_29_2   | 2 | 29  | 0.655172 | AAgTTTTAcAAATAAAATaaTTTTTAggAA        |
| Mhapla.WS247                                                                                                                                                    | Mhapla.WS247_Fam_97_28_2   | 2 | 28  | 0.678571 | AAAAtACAAAATACaAATAAACTgGga           |
| Mhapla.WS247                                                                                                                                                    | Mhapla.WS247_Fam_98_27_2   | 2 | 27  | 0.703704 | TTGAcTTTTGTaATATTTTgGccTAT            |
| Mhapla.WS247                                                                                                                                                    | Mhapla.WS247_Fam_99_26_2   | 2 | 26  | 0.679487 | TTAAATAAACTcGAAGcAAAaCTTtg            |
| Mhapla.WS247                                                                                                                                                    | Mhapla.WS247_Fam_100_25_2  | 2 | 25  | 0.600000 | TTTTcagTAATTaGCTTTaAATGa              |
| Mhapla.WS247                                                                                                                                                    | Mhapla.WS247_Fam_101_24_2  | 2 | 24  | 0.625000 | TTACAAaAATATTTaaTTAcaAaa              |
| Mhapla.WS247                                                                                                                                                    | Mhapla.WS247_Fam_102_24_2  | 2 | 24  | 0.888889 | GGGTCACAAaTATCCaGAGAAACCC             |
| Mhapla.WS247                                                                                                                                                    | Mhapla.WS247_Fam_103_23_2  | 2 | 23  | 0.666667 | aaAATTcTGAAAAAcTTgGGAAa               |
| Mhapla.WS247                                                                                                                                                    | Mhapla.WS247_Fam_104_23_2  | 2 | 23  | 0.688406 | ATTCtgATTTTcGgTTTTATca                |
| Mhapla.WS247                                                                                                                                                    | Mhapla.WS247_Fam_105_23_2  | 2 | 23  | 0.688406 | aAGAAaAAATTTTAGAAaAAAt                |
| Mhapla.WS247                                                                                                                                                    | Mhapla.WS247_Fam_106_22_2  | 2 | 22  | 0.689394 | aaATCAGAATTaTTTaAGAAga                |
| Mhapla.WS247                                                                                                                                                    | Mhapla.WS247_Fam_107_22_2  | 2 | 22  | 0.742424 | TtcTGatTTTTAAAAATTAaa                 |
| Mhapla.WS247                                                                                                                                                    | Mhapla.WS247_Fam_108_22_2  | 2 | 22  | 0.636364 | TTgTTTTATTTAtTTAaaaaAa                |
| Mhapla.WS247                                                                                                                                                    | Mhapla.WS247_Fam_109_22_2  | 2 | 22  | 0.727273 | AaGGAACATCCatCTAGTCTGa                |
| Mhapla.WS247                                                                                                                                                    | Mhapla.WS247_Fam_110_22_2  | 2 | 22  | 0.613636 | gGAAGCATGCTTCaAaaTTaCg                |
| Mhapla.WS247                                                                                                                                                    | Mhapla.WS247_Fam_111_22_2  | 2 | 22  | 0.939394 | GGCCTcCGGCCCTCGACTTCTC                |
| Mhapla.WS247                                                                                                                                                    | Mhapla.WS247_Fam_112_21_2  | 2 | 21  | 0.698413 | AATTCGATgTTTTTaAaCaa                  |
| Mhapla.WS247                                                                                                                                                    | Mhapla.WS247_Fam_113_20_2  | 2 | 20  | 0.641667 | CAAcGAaAATAcAAGACTa                   |
| Mhapla.WS247                                                                                                                                                    | Mhapla.WS247_Fam_114_19_2  | 2 | 19  | 0.684211 | TATTTTTGaAgaAAAgAAT                   |
| Mhapla.WS247                                                                                                                                                    | Mhapla.WS247_Fam_115_19_2  | 2 | 19  | 1.000000 | AAATGTTTTCCGAAAAAAG                   |
| Mhapla.WS247                                                                                                                                                    | Mhapla.WS247_Fam_116_18_2  | 2 | 18  | 0.611111 | TAACTTGAAAaAcTgAag                    |
| Mhapla.WS247                                                                                                                                                    | Mhapla.WS247_Fam_117_18_2  | 2 | 18  | 0.666667 | AaTTaTTAaTAAACaAG                     |
| Mhapla.WS247                                                                                                                                                    | Mhapla.WS247_Fam_118_18_2  | 2 | 18  | 0.851852 | CTACACCcCAaCGGGAT                     |
| Mhapla.WS247                                                                                                                                                    | Mhapla.WS247_Fam_119_16_2  | 2 | 16  | 0.708333 | TaTTATAAaGAGTGTc                      |
| Mhapla.WS247                                                                                                                                                    | Mhapla.WS247_Fam_120_16_2  | 2 | 16  | 0.833333 | TATAGTGAActCcCGa                      |
| Mhapla.WS247                                                                                                                                                    | Mhapla.WS247_Fam_121_15_2  | 2 | 15  | 0.733333 | AAAcTGGTACaaGAC                       |
| Mhapla.WS247                                                                                                                                                    | Mhapla.WS247_Fam_122_14_2  | 2 | 14  | 0.666667 | TAGgTAAGGcAAcT                        |
| Mhapla.WS247                                                                                                                                                    | Mhapla.WS247_Fam_123_14_2  | 2 | 14  | 1.000000 | ACTCTGAATCGGCT                        |
| Mhapla.WS247                                                                                                                                                    | Mhapla.WS247_Fam_124_13_2  | 2 | 13  | 1.000000 | TTCCGGAACCAA                          |
| Mhapla.WS247                                                                                                                                                    | Mhapla.WS247_Fam_125_12_2  | 2 | 12  | 1.000000 | TACCGTACCGTA                          |
| Mhapla.WS247                                                                                                                                                    | Mhapla.WS247_Fam_126_11_2  | 2 | 11  | 1.000000 | ATAACTTTCGC                           |
| Mhapla.WS247                                                                                                                                                    | Mhapla.WS247_Fam_127_10_2  | 2 | 10  | 0.733333 | TATTTTaaTg                            |
| Mhapla.WS247                                                                                                                                                    | Mhapla.WS247_Fam_128_181_1 | 1 | 181 | 0.000000 |                                       |
| TTTCTTTATTTTTTATACAATATAGATCTATGTCTTATCTAACATATCCCAAATATCTAGGAGATCGTTGCATTTTAAAGCCCGAAATTTTTCAATTTTGAGTCTGATGACTCTGAAAGATAAAAAATTTCTCCTGTTAAAACTCTAACCCCTATAA   |                            |   |     |          |                                       |
| CTCAAAATTTTGAAGTTGAAA                                                                                                                                           |                            |   |     |          |                                       |
| Mhapla.WS247                                                                                                                                                    | Mhapla.WS247_Fam_129_179_1 | 1 | 179 | 0.000000 |                                       |
| TCATAGGACTTCGGCCACCCCATTAAGTTTTGAGAAGCAATAAGAAGCTTGGTAAGCCTTTTTAGAGTCAAATATGATTAGATCTCGTGTGTATGATTTGGTATAAGAACTAGAACCGCCACCGGATCCCACAAGCTAAAGTAGTGTCTCTATTTAG   |                            |   |     |          |                                       |
| AAGCTCCAATATGAAAAAC                                                                                                                                             |                            |   |     |          |                                       |
| Mhapla.WS247                                                                                                                                                    | Mhapla.WS247_Fam_130_177_1 | 1 | 177 | 0.000000 |                                       |
| ACAAAAAATTAGAAAAATTTAATTTAGAAAATCGTTCCTAGAGGAGTCGGAATTTTCATTAATTTTAGAGCTTTATAATTAAGTCAACAGACTCTAAGGGTCATTTCTCTAAAAATTGACGTGAGATCACCTAATAAATTTTGGATATTGTAGATAAGA |                            |   |     |          |                                       |
| TGTATTACATCTTTAC                                                                                                                                                |                            |   |     |          |                                       |
| Mhapla.WS247                                                                                                                                                    | Mhapla.WS247_Fam_131_168_1 | 1 | 168 | 0.000000 |                                       |
| CCCAAGTTTTGFAAGGGAGGACGAAGTCCCTATGAGTTTTTTGTTTTCCATCAACGCTACTTTAGCAATCAGGATCCGGGTTGCATTTCTCTTTCTTATGCTCAGTCATACACACCAAACCTATCATATTGGACTCAAGGAACACTACACAAGCTTTTT |                            |   |     |          |                                       |
| ATGGCTTC                                                                                                                                                        |                            |   |     |          |                                       |
| Mhapla.WS247                                                                                                                                                    | Mhapla.WS247_Fam_132_141_1 | 1 | 141 | 0.000000 |                                       |
| AATTATAATTTAATTTGCTAATACAATTAATATATACTTAATATCGCTTAATTTAAATGCAAAATTTATCAATATAAATTTGCATTTAAATTAACCAAATACCTATTCTAATCTTATTATCTTTAATTTTATTAGCAA                      |                            |   |     |          |                                       |

|              |                            |   |     |          |                                                                                                                                        |
|--------------|----------------------------|---|-----|----------|----------------------------------------------------------------------------------------------------------------------------------------|
| Mhapla.WS247 | Mhapla.WS247_Fam_133_137_1 | 1 | 137 | 0.000000 |                                                                                                                                        |
|              |                            |   |     |          | TTTAACATTTGTATTACTTTAAATAAAATATAAAAGTCTATTAATAAAGAATATCGAATAAAATTTTAGGTTTCTGTTCCCTCATTTAGGTTATGGAATCTTCTGTATGTCGAGAATATTACTATTTTTATAGA |
| Mhapla.WS247 | Mhapla.WS247_Fam_134_135_1 | 1 | 135 | 0.000000 |                                                                                                                                        |
|              |                            |   |     |          | TAATTATTTTATCTTTCTAAACCTATGATATCAACTATTTTTCTTCGTCCTACTTATCTTCCGAACGAATAAACTCTTCCATTCTCTTCATCATCTCTTCCATCAACATCTTCTCACTATTTCTACTGT      |
| Mhapla.WS247 | Mhapla.WS247_Fam_135_120_1 | 1 | 120 | 0.000000 |                                                                                                                                        |
|              |                            |   |     |          | AAAATAATAAAATAATAATAAAGAGACACCGAATAATAAAATGTTTATAATTGCTTAAGAATAAGATATTTTCTGACTAACATAACGATTTAATATTTATTCGATTTAATATAATTAT                 |
| Mhapla.WS247 | Mhapla.WS247_Fam_136_111_1 | 1 | 111 | 0.000000 |                                                                                                                                        |
|              |                            |   |     |          | CATCATCAGAAGTATCTTCAGAGAAGATGGTTCGCTTCTTTGTGCGCAGGCAAAGCGTTTCGCAAGTCTGGTAGTAGCCTTGGCCGTAGAGTTTTAGATGCCAAAC                             |
| Mhapla.WS247 | Mhapla.WS247_Fam_137_104_1 | 1 | 104 | 0.000000 |                                                                                                                                        |
|              |                            |   |     |          | TGCTGAGCTACGAGCAGGCAAGGCCATGCGAGTTGCCCGCCGACTAAGCCAGCTCGAAGGCTCGGGACCGGGAAGGAGACGCGGGTAAAACCGAAACAAGCG                                 |
| Mhapla.WS247 | Mhapla.WS247_Fam_138_101_1 | 1 | 101 | 0.000000 |                                                                                                                                        |
|              |                            |   |     |          | TTAGAGTCTGGTGTATTAGAAAATTTCTCCTGTATACTTCTAGGATCTATAAAAAATGCTTTGAGACGATAGAATTTCTTTATTTTTTCTTCAAAGATGGA                                  |
| Mhapla.WS247 | Mhapla.WS247_Fam_139_97_1  | 1 | 97  | 0.000000 |                                                                                                                                        |
|              |                            |   |     |          | GAGAAGTGGCTTGATAAAACAAACAATTTGTTGGATAATAAAATACGAATACAACCTAATCTTCCAAATTCATGATTAATCCAAGCTTTTCGAA                                         |
| Mhapla.WS247 | Mhapla.WS247_Fam_140_97_1  | 1 | 97  | 0.000000 |                                                                                                                                        |
|              |                            |   |     |          | TTTACTTTATCTCATTTTACCATGATATAGGTTTAAATAAATCAAATACTTTTCTAAATATAAATCTAAATATAAATCTTTTATTATTAATACCTA                                       |
| Mhapla.WS247 | Mhapla.WS247_Fam_141_93_1  | 1 | 93  | 0.000000 |                                                                                                                                        |
|              |                            |   |     |          | CTTCAGGACCAACTGGAGCACCAACAGCAACTCCAGCTTCACTGAATCAACAGGCTCTCCTGCTCCATCTACTTCAGCTGAAACTGGCTCAC                                           |
| Mhapla.WS247 | Mhapla.WS247_Fam_142_92_1  | 1 | 92  | 0.000000 |                                                                                                                                        |
|              |                            |   |     |          | TTCAAATTTATAATAAAATTTTCAAAGACATAAAATCTGCCTACAAAAAATTTTGAATTTTTATTCTTTTAAATCAGAATT                                                      |
| Mhapla.WS247 | Mhapla.WS247_Fam_143_90_1  | 1 | 90  | 0.000000 |                                                                                                                                        |
|              |                            |   |     |          | AAACAAATTAGCTAAATCAAGTTTAGCTTACAAAAATAAGGGACTCCGAAAAAGGCAGTTAATTAGAGAATTTTTTAGTATTTAA                                                  |
| Mhapla.WS247 | Mhapla.WS247_Fam_144_84_1  | 1 | 84  | 0.000000 |                                                                                                                                        |
|              |                            |   |     |          | ATATTATTTTTAGAATATAGTCTAATGCACTATCAGAACCCTATTTTTCTTCTATCTTTTCAATTTTTGTATTCTCTCTA                                                       |
| Mhapla.WS247 | Mhapla.WS247_Fam_145_82_1  | 1 | 82  | 0.000000 |                                                                                                                                        |
|              |                            |   |     |          | TTAATAAATAAACGACTAGATTTGCTGATGGAACTCGAACTAATTAGTTTCGTAAAGTTTCGAATAAGAAATAATCAA                                                         |
| Mhapla.WS247 | Mhapla.WS247_Fam_146_81_1  | 1 | 81  | 0.000000 |                                                                                                                                        |
|              |                            |   |     |          | CTCTAGAGGGAACCTCCATAAATAGTGAACCTCCATATTATGAACCTTTTTAAAGTTCCCATGCCTCAACTAGAGGGGA                                                        |
| Mhapla.WS247 | Mhapla.WS247_Fam_147_79_1  | 1 | 79  | 0.000000 |                                                                                                                                        |
|              |                            |   |     |          | AATGGATATCCCTACCCCTATATTCTTAGGGTTACAAATCCCTAATTTAGGTGACTTTTGAGTATTATGCCCTTACA                                                          |
| Mhapla.WS247 | Mhapla.WS247_Fam_148_78_1  | 1 | 78  | 0.000000 |                                                                                                                                        |
|              |                            |   |     |          | TCCATCTACACAAAAGACAGGAGGAGTGGCATCGAACAAAGCCCTGCAGGATTGCCATCTACCGGACGGCCAGAAAC                                                          |
| Mhapla.WS247 | Mhapla.WS247_Fam_149_77_1  | 1 | 77  | 0.000000 |                                                                                                                                        |
|              |                            |   |     |          | ATTTTTTAGGGTTAAATCCCGAATTTTTCATTTTTATTCTGATTTATTAATCAGAATTTTTTATTTTTATTTAA                                                             |
| Mhapla.WS247 | Mhapla.WS247_Fam_150_76_1  | 1 | 76  | 0.000000 |                                                                                                                                        |
|              |                            |   |     |          | GATTTATTAAGAATTAGCCTACACCAATAAAATTTATTTTTATTATAACATTATTTCAATTCGGAAGTTTGATA                                                             |
| Mhapla.WS247 | Mhapla.WS247_Fam_151_76_1  | 1 | 76  | 0.000000 |                                                                                                                                        |
|              |                            |   |     |          | ATTAATTCAAAAGGATATATCCAAATAAATGATTCGGAACAAAATTTGAAAAATTTTACGCTCCTCAAAAACCAGA                                                           |
| Mhapla.WS247 | Mhapla.WS247_Fam_152_75_1  | 1 | 75  | 0.000000 |                                                                                                                                        |
|              |                            |   |     |          | AGAAACGATTCCTTAGGTAGTTTATTGTGGGATAATAAAGAAATGTTAGATAGTTTGAGATTAAGAAGAAAA                                                               |
| Mhapla.WS247 | Mhapla.WS247_Fam_153_74_1  | 1 | 74  | 0.000000 |                                                                                                                                        |
|              |                            |   |     |          | TTTGTCTTTATGTAGAGAGTGTGTGAATTAGAGAGTAAAAGGAATCAATTTTCTTGCCTGGATTCTGAGAGGT                                                              |
| Mhapla.WS247 | Mhapla.WS247_Fam_154_74_1  | 1 | 74  | 0.000000 |                                                                                                                                        |
|              |                            |   |     |          | CCCTAATCTCGGTAAACAATCCCATTTCTTTACCTACGATGGGTCTCTATAGGTATCAAGGGTTACAATGGT                                                               |
| Mhapla.WS247 | Mhapla.WS247_Fam_155_74_1  | 1 | 74  | 0.000000 |                                                                                                                                        |
|              |                            |   |     |          | CGAAATTTAACTAACGAGAAAATGATATAATGCAACAGAACAAAATCCTACAACCTACATTAGGAATCATTCGC                                                             |
| Mhapla.WS247 | Mhapla.WS247_Fam_156_73_1  | 1 | 73  | 0.000000 |                                                                                                                                        |
|              |                            |   |     |          | GTGAAGATCATCTTATAGCCTCTTAAGGTCGCATCTGGATAATTTATATTGATCATTCTCGTCTTTTTATT                                                                |
| Mhapla.WS247 | Mhapla.WS247_Fam_157_72_1  | 1 | 72  | 0.000000 | TGGAGTTGAAGGAGTATTTGGTCCAATCTTGTCTTCGAGTTCTAAAGTGGTCGAGGATGTTCCGTTTGC                                                                  |
| Mhapla.WS247 | Mhapla.WS247_Fam_158_72_1  | 1 | 72  | 0.000000 | ACAAAACCTCGCTAAATGCTGACCATCAATTTGAAAAATCAAGCAACATAATACGAATCAACCAATAAACA                                                                |
| Mhapla.WS247 | Mhapla.WS247_Fam_159_71_1  | 1 | 71  | 0.000000 | TCTTTAAATTGAAAACCTTTTTTATTCTCACCGCGCTTTTTTGGTCTCTCCAGTTTCTTCTGATTCGACC                                                                 |
| Mhapla.WS247 | Mhapla.WS247_Fam_160_69_1  | 1 | 69  | 0.000000 | AAATAAACTCATTGATCGGTCAATCTTTTTTCAATTCATCTTTGATCTCCTTTTTCAGTTGTGTCC                                                                     |
| Mhapla.WS247 | Mhapla.WS247_Fam_161_68_1  | 1 | 68  | 0.000000 | AAATAATTTCTAAAAAATGAAAAAATTCGAGGATTTATTGGATCTATCAAAAAATGGAATTA                                                                         |
| Mhapla.WS247 | Mhapla.WS247_Fam_162_68_1  | 1 | 68  | 0.000000 | GGGATTTCCGACTAATGTAATACTAGTATCAAAGTGAGACGAATAAACATCTTTGGATAGATGAGAG                                                                    |
| Mhapla.WS247 | Mhapla.WS247_Fam_163_67_1  | 1 | 67  | 0.000000 | AAATACAATAGCCCGAAGTCTATAGATACAGTCGGGCTTATTACGGGTATACTGTACATATCAAG                                                                      |
| Mhapla.WS247 | Mhapla.WS247_Fam_164_67_1  | 1 | 67  | 0.000000 | TATTAGTTTAGAGATGTAATGCCATATAATAGGATTTAAGGACAAGCACTGAAAAATAGAAATAGCG                                                                    |
| Mhapla.WS247 | Mhapla.WS247_Fam_165_66_1  | 1 | 66  | 0.000000 | GTCAAACAATATAATGATACTAAATGTCATAAATTAATCCATAAATCGTTGCAATCTGTGGAAC                                                                       |

|              |                           |   |    |          |                                                                      |
|--------------|---------------------------|---|----|----------|----------------------------------------------------------------------|
| Mhapla.WS247 | Mhapla.WS247_Fam_166_65_1 | 1 | 65 | 0.000000 | TATTTTCATATATTTATATTTTTTAAATTTTAAATTTTTTAATTAATAAATAATATTTTTTTTAT    |
| Mhapla.WS247 | Mhapla.WS247_Fam_167_64_1 | 1 | 64 | 0.000000 | AGAATTACAACATAAAGTTGGGATCCCCFAAACFAGAGGGTAAACCCCTTGACAAATAATCCTTT    |
| Mhapla.WS247 | Mhapla.WS247_Fam_168_64_1 | 1 | 64 | 0.000000 | AAGAATAATTTACACGAATATCTCGAATGTCATGATATGACATAATAACATTTGCACGATTTT      |
| Mhapla.WS247 | Mhapla.WS247_Fam_169_64_1 | 1 | 64 | 0.000000 | ATTTATTTTTGGACAATCTAGATAAATTTCTTTTGATTTCTATCTGCTTATCTGTGCGAAGTCCCTTT |
| Mhapla.WS247 | Mhapla.WS247_Fam_170_63_1 | 1 | 63 | 0.000000 | TAAAATTTTGAGGTAACCATACTCTAACGGCAATTTCTCGAAAATCCGCTACGATTTTCTT        |
| Mhapla.WS247 | Mhapla.WS247_Fam_171_63_1 | 1 | 63 | 0.000000 | TTACATACAGGGGGGCTGCGCTGCGTTTGGTGCCAAATTTGGCATGACCTCTTAAATTT          |
| Mhapla.WS247 | Mhapla.WS247_Fam_172_63_1 | 1 | 63 | 0.000000 | TTGTTCTGCTTTCAATGTTTATTTTTCTCTGAATTTTGAAGAGTTTCTTTATCTATTGTGTA       |
| Mhapla.WS247 | Mhapla.WS247_Fam_173_62_1 | 1 | 62 | 0.000000 | TCCGAAGAAAAACACCTGGATGATTTGTCAATAGCAATAGATAACAAAAATCGTCAAAAAAT       |
| Mhapla.WS247 | Mhapla.WS247_Fam_174_62_1 | 1 | 62 | 0.000000 | GATAAAAAATGGCAAAAAATCAGAATAAAAATAAAGGTTATCGATACTCTAATAGTCCCTGCTC     |
| Mhapla.WS247 | Mhapla.WS247_Fam_175_58_1 | 1 | 58 | 0.000000 | TTTCCGAAAAGTTTAAATGTTTTTGTGTTTTAAAAAGTTTTATAATTTTCAGAAATTT           |
| Mhapla.WS247 | Mhapla.WS247_Fam_176_58_1 | 1 | 58 | 0.000000 | AATTAATGTAAGAATTTAAAAATAAATTTTCAGAGTTCCGAAAATAATTTTTCTGA             |
| Mhapla.WS247 | Mhapla.WS247_Fam_177_57_1 | 1 | 57 | 0.000000 | TATTTCTATTACTTGAGAATATGACATAAATCAAATTATGGAGTCAGTGCATATGTC            |
| Mhapla.WS247 | Mhapla.WS247_Fam_178_56_1 | 1 | 56 | 0.000000 | GTTTTGCCGTCCGCTACCAAAGCTTTGTTCTATTTCGGACAGCTTTTCACGTTTACC            |
| Mhapla.WS247 | Mhapla.WS247_Fam_179_56_1 | 1 | 56 | 0.000000 | TATATTTAAAAAATAAATCAGAAATTTACTTAAATTTTATTAATAAATTTGGCTTT             |
| Mhapla.WS247 | Mhapla.WS247_Fam_180_55_1 | 1 | 55 | 0.000000 | TATGGCAATGATCTAGAATGGTTATACCTCTTTAATACACTGCCATTTCCCGGCTC             |
| Mhapla.WS247 | Mhapla.WS247_Fam_181_54_1 | 1 | 54 | 0.000000 | ATACTAACCTGGAAACTGAGAGGCCCTTFCGAAATAGAACAATCCTCCTATATG               |
| Mhapla.WS247 | Mhapla.WS247_Fam_182_54_1 | 1 | 54 | 0.000000 | AATATTTTCCGGAAGATGTTTTATTGTTTTCCGGACAATTAATATTTATATTA                |
| Mhapla.WS247 | Mhapla.WS247_Fam_183_53_1 | 1 | 53 | 0.000000 | AAATTTTAAATAGAAGTTTCCGGAATAATAACTTTACAAAATATATAATTAC                 |
| Mhapla.WS247 | Mhapla.WS247_Fam_184_51_1 | 1 | 51 | 0.000000 | AGGACAAGGACATTTCTCAAGTGAATCGAAGGAACACACACCAAAACCTTC                  |
| Mhapla.WS247 | Mhapla.WS247_Fam_185_50_1 | 1 | 50 | 0.000000 | AGAAACGATTAATAAATAAATTTATTCGTGAATTTTCTTATTAGAAGTCGATG                |
| Mhapla.WS247 | Mhapla.WS247_Fam_186_49_1 | 1 | 49 | 0.000000 | TAAACATGTTTTTAAACATCAAAACAAGTTTAAATAATCAGAATTTATTC                   |
| Mhapla.WS247 | Mhapla.WS247_Fam_187_48_1 | 1 | 48 | 0.000000 | CTTTATAAAAAACACACCTTATAACCCCTCCCTTTACAAGCCACTTC                      |
| Mhapla.WS247 | Mhapla.WS247_Fam_188_48_1 | 1 | 48 | 0.000000 | GAATTAGAAGCTAAAAAGAAGTCTGAACCAGAACGCAAAAGAAAAAGCT                    |
| Mhapla.WS247 | Mhapla.WS247_Fam_189_48_1 | 1 | 48 | 0.000000 | CCTTCTCTATCCTTCCACTTCCCTCCATTTCTTCTCTCCATTTCCACCT                    |
| Mhapla.WS247 | Mhapla.WS247_Fam_190_48_1 | 1 | 48 | 0.000000 | AGGACAATTCACCGTTCGACTTTTTCACCTAATAGGATATTTTCCCTAT                    |
| Mhapla.WS247 | Mhapla.WS247_Fam_191_46_1 | 1 | 46 | 0.000000 | TCAAAATTTTATGTTTTCTCGCCTAAAAAATTTCTTACCCTATAAA                       |
| Mhapla.WS247 | Mhapla.WS247_Fam_192_46_1 | 1 | 46 | 0.000000 | GGGATGTTTCAATTCATCTGGGATGAGAGTTTACTCTCATTTCCATCT                     |
| Mhapla.WS247 | Mhapla.WS247_Fam_193_45_1 | 1 | 45 | 0.000000 | AATTTCTGATTTTTAAGTGTATTTTTGTATTAGATTTTTAATTA                         |
| Mhapla.WS247 | Mhapla.WS247_Fam_194_45_1 | 1 | 45 | 0.000000 | AATAATTTAATTAATGTTTTGGATAAAATTTCTGAATGATTTTTCCG                      |
| Mhapla.WS247 | Mhapla.WS247_Fam_195_45_1 | 1 | 45 | 0.000000 | TTATTAATTAATTAATTTGCATTATTTCTAATTAACATATTTAGT                        |
| Mhapla.WS247 | Mhapla.WS247_Fam_196_44_1 | 1 | 44 | 0.000000 | AAGGTAATCCCCAAACTCCATGACGTTTGTGCTAGGAGTCCCTC                         |
| Mhapla.WS247 | Mhapla.WS247_Fam_197_42_1 | 1 | 42 | 0.000000 | GAAAAAGCCTTCTGGAGTTTCAAGTGAATCGAAAGAACATAC                           |
| Mhapla.WS247 | Mhapla.WS247_Fam_198_41_1 | 1 | 41 | 0.000000 | CGGGAAACGGTAATTTCCGGGAAATACAAATTTCCCGAATAT                           |
| Mhapla.WS247 | Mhapla.WS247_Fam_199_41_1 | 1 | 41 | 0.000000 | GCCCCGACCTAAGTCAGTAAGGCTGCCACCATTGCATCAA                             |
| Mhapla.WS247 | Mhapla.WS247_Fam_200_41_1 | 1 | 41 | 0.000000 | AATTTCCGGAAGTTGTGATTTATTTTACAATTTGCGAATAG                            |
| Mhapla.WS247 | Mhapla.WS247_Fam_201_41_1 | 1 | 41 | 0.000000 | ATAGAGGGTTATTAAGCGAGAGTTTACATTAGTTTCTTAA                             |
| Mhapla.WS247 | Mhapla.WS247_Fam_202_40_1 | 1 | 40 | 0.000000 | CAGAATTTAATATAAACATTAATAATGAAGAAGTAAAAAT                             |
| Mhapla.WS247 | Mhapla.WS247_Fam_203_40_1 | 1 | 40 | 0.000000 | AAACTTAAGTTTGGCGTTTTCTGATTTAGTAAATAATTTTA                            |
| Mhapla.WS247 | Mhapla.WS247_Fam_204_40_1 | 1 | 40 | 0.000000 | AAATTTTGAGTTATAGGGGTTTGAATTTTTTATAGGCGA                              |
| Mhapla.WS247 | Mhapla.WS247_Fam_205_40_1 | 1 | 40 | 0.000000 | CCGAGACGGCAAAGGATTTGACACATCTACTAACAAAGTAT                            |
| Mhapla.WS247 | Mhapla.WS247_Fam_206_39_1 | 1 | 39 | 0.000000 | CCTTCAGCCCATGTCCCTCCACACTACACTCCATGTTT                               |
| Mhapla.WS247 | Mhapla.WS247_Fam_207_39_1 | 1 | 39 | 0.000000 | AGGGTATTTAATAAATACCTTATTTCTGCTAATAGAAAT                              |
| Mhapla.WS247 | Mhapla.WS247_Fam_208_39_1 | 1 | 39 | 0.000000 | CCACTACAACCCCGGCTGAAGAGACTACCACACCAGCT                               |
| Mhapla.WS247 | Mhapla.WS247_Fam_209_39_1 | 1 | 39 | 0.000000 | AAAGTTTCAGAATAAGTTGGAAATTTGTGTTTTAAAGGAA                             |
| Mhapla.WS247 | Mhapla.WS247_Fam_210_37_1 | 1 | 37 | 0.000000 | TTTTCCGGAAGATTAATATTCATGTTTTTACATTTAA                                |
| Mhapla.WS247 | Mhapla.WS247_Fam_211_37_1 | 1 | 37 | 0.000000 | AAGTAAATCAGACTTCTAGACTGTCAAAATAAACTTA                                |
| Mhapla.WS247 | Mhapla.WS247_Fam_212_36_1 | 1 | 36 | 0.000000 | GCTAGGTAATAATTTTATTAAGTTAGGTATTATTAA                                 |
| Mhapla.WS247 | Mhapla.WS247_Fam_213_36_1 | 1 | 36 | 0.000000 | CGTCGTAGCTGGGCTTGTAGCTCGTTTTGTAACCTT                                 |
| Mhapla.WS247 | Mhapla.WS247_Fam_214_35_1 | 1 | 35 | 0.000000 | AAAAATCCAATTTACTCTAAATTTACAGTAAGTACA                                 |
| Mhapla.WS247 | Mhapla.WS247_Fam_215_35_1 | 1 | 35 | 0.000000 | AAAAAAGTCCCTACTTGACTTTTATGTGAGGGGCAA                                 |
| Mhapla.WS247 | Mhapla.WS247_Fam_216_35_1 | 1 | 35 | 0.000000 | TTATTTAAAAATGATTTTCAATTTACAAATTTCAAGT                                |
| Mhapla.WS247 | Mhapla.WS247_Fam_217_34_1 | 1 | 34 | 0.000000 | TTTACAAATCATATATTTCTGATTTAAATTTATAAT                                 |
| Mhapla.WS247 | Mhapla.WS247_Fam_218_33_1 | 1 | 33 | 0.000000 | TATAAGCAAGTTTTAATTTAAATAGGGAACGTT                                    |
| Mhapla.WS247 | Mhapla.WS247_Fam_219_33_1 | 1 | 33 | 0.000000 | CTGGTCCATCAACACCTGTCCACACAGGAACTC                                    |
| Mhapla.WS247 | Mhapla.WS247_Fam_220_32_1 | 1 | 32 | 0.000000 | TTCCAACCTTCTGGAATATTTATTTTTTACAA                                     |
| Mhapla.WS247 | Mhapla.WS247_Fam_221_32_1 | 1 | 32 | 0.000000 | GGGCATTAGTTATTCGAGATGGCAATAAAGGG                                     |
| Mhapla.WS247 | Mhapla.WS247_Fam_222_32_1 | 1 | 32 | 0.000000 | GGGTAATTAATTTTTTCAACCTCTTGCTGGAGG                                    |

|              |                           |   |    |          |                                   |
|--------------|---------------------------|---|----|----------|-----------------------------------|
| Mhapla.WS247 | Mhapla.WS247_Fam_223_32_1 | 1 | 32 | 0.000000 | AACAATTTTTCTGATTATTTTTTTTAATTTCC  |
| Mhapla.WS247 | Mhapla.WS247_Fam_224_31_1 | 1 | 31 | 0.000000 | TAATTTGTAATTTTTGTTTTCCGGATCTTTTAA |
| Mhapla.WS247 | Mhapla.WS247_Fam_225_31_1 | 1 | 31 | 0.000000 | AACCGAAAACCGGGGTCAAAAATCGGACT     |
| Mhapla.WS247 | Mhapla.WS247_Fam_226_31_1 | 1 | 31 | 0.000000 | TGATTTGTTCTGGTTGATTTCTGGTACAGTTC  |
| Mhapla.WS247 | Mhapla.WS247_Fam_227_30_1 | 1 | 30 | 0.000000 | TTTCCGAAATCGTACAAAAATTTTTGTAC     |
| Mhapla.WS247 | Mhapla.WS247_Fam_228_30_1 | 1 | 30 | 0.000000 | TCCGGAAAACTTAAAAGAAAATTAGATATT    |
| Mhapla.WS247 | Mhapla.WS247_Fam_229_30_1 | 1 | 30 | 0.000000 | GATGGATTTTGAGTCGTTGGAGCTGCTGTC    |
| Mhapla.WS247 | Mhapla.WS247_Fam_230_30_1 | 1 | 30 | 0.000000 | TAAACTTAAAATGAAGCTTATTTTCAAGTT    |
| Mhapla.WS247 | Mhapla.WS247_Fam_231_30_1 | 1 | 30 | 0.000000 | TCCTTTAACTTCTTCTGTAGTTCCTCTTT     |
| Mhapla.WS247 | Mhapla.WS247_Fam_232_30_1 | 1 | 30 | 0.000000 | GTTTATTTAAAATCAGAATTTGTAAATCAG    |
| Mhapla.WS247 | Mhapla.WS247_Fam_233_30_1 | 1 | 30 | 0.000000 | AATCTGATTTCCGGAATAAGTTTATTTGA     |
| Mhapla.WS247 | Mhapla.WS247_Fam_234_30_1 | 1 | 30 | 0.000000 | CTAGCACAGCTGGCACATCAACTGAAGCAC    |
| Mhapla.WS247 | Mhapla.WS247_Fam_235_30_1 | 1 | 30 | 0.000000 | AATAATTTTCCGGAAGGTAAATAAATGTA     |
| Mhapla.WS247 | Mhapla.WS247_Fam_236_30_1 | 1 | 30 | 0.000000 | AGTGGACTTAGCACCTTGGAATGGCCTT      |
| Mhapla.WS247 | Mhapla.WS247_Fam_237_30_1 | 1 | 30 | 0.000000 | GAGGAAGATGAATCTGGGGTCAGTGAAGAC    |
| Mhapla.WS247 | Mhapla.WS247_Fam_238_29_1 | 1 | 29 | 0.000000 | AAATACATTTCTTTCTGAAAATTTAAATA     |
| Mhapla.WS247 | Mhapla.WS247_Fam_239_29_1 | 1 | 29 | 0.000000 | AAAAAACAGAATTTTGGGGGAAGAGAGCC     |
| Mhapla.WS247 | Mhapla.WS247_Fam_240_29_1 | 1 | 29 | 0.000000 | ATATTTTTACAATCAAGTTTATGTTGTA      |
| Mhapla.WS247 | Mhapla.WS247_Fam_241_28_1 | 1 | 28 | 0.000000 | TTTATAAGCCTCTATTTAATAAATACTT      |
| Mhapla.WS247 | Mhapla.WS247_Fam_242_27_1 | 1 | 27 | 0.000000 | ATTTGGTCACTTAAGGGAATATACTC        |
| Mhapla.WS247 | Mhapla.WS247_Fam_243_27_1 | 1 | 27 | 0.000000 | CAAAAACGCAATACCCCCAAAAATCGA       |
| Mhapla.WS247 | Mhapla.WS247_Fam_244_27_1 | 1 | 27 | 0.000000 | AAATAAECTTGGATTCATAATTACAAT       |
| Mhapla.WS247 | Mhapla.WS247_Fam_245_27_1 | 1 | 27 | 0.000000 | AAATCCAGCATCAGTATATGGCGCCCA       |
| Mhapla.WS247 | Mhapla.WS247_Fam_246_27_1 | 1 | 27 | 0.000000 | TCATAATTTACTAATGATTAGTACTAA       |
| Mhapla.WS247 | Mhapla.WS247_Fam_247_27_1 | 1 | 27 | 0.000000 | AAAATGCCAATAAGGCAAAAAACACTA       |
| Mhapla.WS247 | Mhapla.WS247_Fam_248_27_1 | 1 | 27 | 0.000000 | AGTGCAAAAACCGTGGATTCGTCCCAT       |
| Mhapla.WS247 | Mhapla.WS247_Fam_249_26_1 | 1 | 26 | 0.000000 | AAAATGGACAATTGCCATAAGGGTA         |
| Mhapla.WS247 | Mhapla.WS247_Fam_250_26_1 | 1 | 26 | 0.000000 | AAACAAGTTTATTTATTCAAAAAGAC        |
| Mhapla.WS247 | Mhapla.WS247_Fam_251_26_1 | 1 | 26 | 0.000000 | TCTACAGTATTGCTATCCCTTTCTTT        |
| Mhapla.WS247 | Mhapla.WS247_Fam_252_26_1 | 1 | 26 | 0.000000 | ATTTCCGCATAAAGAACAAAATTTAC        |
| Mhapla.WS247 | Mhapla.WS247_Fam_253_25_1 | 1 | 25 | 0.000000 | TAAAAGAATTGGACAATCCCTTGTA         |
| Mhapla.WS247 | Mhapla.WS247_Fam_254_25_1 | 1 | 25 | 0.000000 | TTTCCACAAGTTCAACAAGTTCCGGT        |
| Mhapla.WS247 | Mhapla.WS247_Fam_255_24_1 | 1 | 24 | 0.000000 | ATCCAAGTTTAATATATATTATTC          |
| Mhapla.WS247 | Mhapla.WS247_Fam_256_24_1 | 1 | 24 | 0.000000 | CCAGGGCTCCCAAGATAAAGCAT           |
| Mhapla.WS247 | Mhapla.WS247_Fam_257_24_1 | 1 | 24 | 0.000000 | GCGGAGGAGGAGGCGGATGCAGCA          |
| Mhapla.WS247 | Mhapla.WS247_Fam_258_23_1 | 1 | 23 | 0.000000 | GAGAACCGAGGTCACCATATTTT           |
| Mhapla.WS247 | Mhapla.WS247_Fam_259_23_1 | 1 | 23 | 0.000000 | AATTCGGAAAGAATTTAATATA            |
| Mhapla.WS247 | Mhapla.WS247_Fam_260_23_1 | 1 | 23 | 0.000000 | GGAATATTTACGAAAAGTTTTC            |
| Mhapla.WS247 | Mhapla.WS247_Fam_261_22_1 | 1 | 22 | 0.000000 | AAATAAAATTTAGAGTTCCGA             |
| Mhapla.WS247 | Mhapla.WS247_Fam_262_22_1 | 1 | 22 | 0.000000 | TTTAAACTTAATAAATTTAAAG            |
| Mhapla.WS247 | Mhapla.WS247_Fam_263_22_1 | 1 | 22 | 0.000000 | CCAGGTTTTTTGTCGCAAAATTG           |
| Mhapla.WS247 | Mhapla.WS247_Fam_264_21_1 | 1 | 21 | 0.000000 | CAAATGTAAACCTTAGATTA              |
| Mhapla.WS247 | Mhapla.WS247_Fam_265_21_1 | 1 | 21 | 0.000000 | ACCAGAAGTGGTGAAGCCCA              |
| Mhapla.WS247 | Mhapla.WS247_Fam_266_21_1 | 1 | 21 | 0.000000 | CCTCCGCATCCACCACCGCCG             |
| Mhapla.WS247 | Mhapla.WS247_Fam_267_21_1 | 1 | 21 | 0.000000 | AATTTGTA AAAAGTTTCCAT             |
| Mhapla.WS247 | Mhapla.WS247_Fam_268_21_1 | 1 | 21 | 0.000000 | AAATTTGTTGCCTAAATTTGCT            |
| Mhapla.WS247 | Mhapla.WS247_Fam_269_21_1 | 1 | 21 | 0.000000 | AGACTCAAGTGACCTTAGATC             |
| Mhapla.WS247 | Mhapla.WS247_Fam_270_21_1 | 1 | 21 | 0.000000 | AATAATATACAGATGATATAC             |
| Mhapla.WS247 | Mhapla.WS247_Fam_271_20_1 | 1 | 20 | 0.000000 | AATTTGTA AACATGCGGGAA             |
| Mhapla.WS247 | Mhapla.WS247_Fam_272_20_1 | 1 | 20 | 0.000000 | TACTCTTATGACTTGATATC              |
| Mhapla.WS247 | Mhapla.WS247_Fam_273_20_1 | 1 | 20 | 0.000000 | TATTTTACTGTAAGAGAAAA              |
| Mhapla.WS247 | Mhapla.WS247_Fam_274_19_1 | 1 | 19 | 0.000000 | CCATCCCAAATTAGGAGTT               |
| Mhapla.WS247 | Mhapla.WS247_Fam_275_19_1 | 1 | 19 | 0.000000 | CCGTTCCATTTTAGGGCAA               |
| Mhapla.WS247 | Mhapla.WS247_Fam_276_19_1 | 1 | 19 | 0.000000 | TTTTATTATTCGTGCGCTC               |
| Mhapla.WS247 | Mhapla.WS247_Fam_277_18_1 | 1 | 18 | 0.000000 | AATACAAGCCCAATCCCC                |
| Mhapla.WS247 | Mhapla.WS247_Fam_278_18_1 | 1 | 18 | 0.000000 | GTTGGTGTTCCTTGGTGT                |
| Mhapla.WS247 | Mhapla.WS247_Fam_279_18_1 | 1 | 18 | 0.000000 | TATCTCACTTAATTTTAT                |

|              |                           |   |    |          |                   |
|--------------|---------------------------|---|----|----------|-------------------|
| Mhapla.WS247 | Mhapla.WS247_Fam_280_17_1 | 1 | 17 | 0.000000 | AAGAGCAAAAAGGCGG  |
| Mhapla.WS247 | Mhapla.WS247_Fam_281_17_1 | 1 | 17 | 0.000000 | TTTGAGGGGATAAATAC |
| Mhapla.WS247 | Mhapla.WS247_Fam_282_16_1 | 1 | 16 | 0.000000 | TTTCCCAGAAATCCCG  |
| Mhapla.WS247 | Mhapla.WS247_Fam_283_16_1 | 1 | 16 | 0.000000 | TGTTCCCTTCCACACTT |
| Mhapla.WS247 | Mhapla.WS247_Fam_284_16_1 | 1 | 16 | 0.000000 | TTGGATGTTTTGTAT   |
| Mhapla.WS247 | Mhapla.WS247_Fam_285_16_1 | 1 | 16 | 0.000000 | CTTCAATTTTTCTTTG  |
| Mhapla.WS247 | Mhapla.WS247_Fam_286_15_1 | 1 | 15 | 0.000000 | CAAAGTGGGCTGCGT   |
| Mhapla.WS247 | Mhapla.WS247_Fam_287_15_1 | 1 | 15 | 0.000000 | CGCCTAGTTGTCTCG   |
| Mhapla.WS247 | Mhapla.WS247_Fam_288_15_1 | 1 | 15 | 0.000000 | AAAGCGCAGTGAAG    |
| Mhapla.WS247 | Mhapla.WS247_Fam_289_15_1 | 1 | 15 | 0.000000 | CCAACCTACCGCTGC   |
| Mhapla.WS247 | Mhapla.WS247_Fam_290_15_1 | 1 | 15 | 0.000000 | AATTTTAACTCAAAT   |
| Mhapla.WS247 | Mhapla.WS247_Fam_291_15_1 | 1 | 15 | 0.000000 | GACTTTTGAGGATCC   |
| Mhapla.WS247 | Mhapla.WS247_Fam_292_15_1 | 1 | 15 | 0.000000 | TCGACTTTTTTATTA   |
| Mhapla.WS247 | Mhapla.WS247_Fam_293_14_1 | 1 | 14 | 0.000000 | GCCAACTGAGTGTT    |
| Mhapla.WS247 | Mhapla.WS247_Fam_294_14_1 | 1 | 14 | 0.000000 | ATTTACAATTTGTA    |
| Mhapla.WS247 | Mhapla.WS247_Fam_295_14_1 | 1 | 14 | 0.000000 | TATATAGGTAGTAA    |
| Mhapla.WS247 | Mhapla.WS247_Fam_296_14_1 | 1 | 14 | 0.000000 | ACTAGAGCGCTCCC    |
| Mhapla.WS247 | Mhapla.WS247_Fam_297_13_1 | 1 | 13 | 0.000000 | TTTACATCGTACT     |
| Mhapla.WS247 | Mhapla.WS247_Fam_298_13_1 | 1 | 13 | 0.000000 | TAACTCCCTCATA     |
| Mhapla.WS247 | Mhapla.WS247_Fam_299_13_1 | 1 | 13 | 0.000000 | AATTTTGGCATT      |
| Mhapla.WS247 | Mhapla.WS247_Fam_300_11_1 | 1 | 11 | 0.000000 | TTACTTCGAAT       |
| Mhapla.WS247 | Mhapla.WS247_Fam_301_11_1 | 1 | 11 | 0.000000 | AATCGATAAAA       |
| Mhapla.WS247 | Mhapla.WS247_Fam_302_11_1 | 1 | 11 | 0.000000 | CAGAATATAAC       |
| Mhapla.WS247 | Mhapla.WS247_Fam_303_10_1 | 1 | 10 | 0.000000 | TTTTTCGGAA        |
| Mhapla.WS247 | Mhapla.WS247_Fam_304_10_1 | 1 | 10 | 0.000000 | GCAAATATTT        |
