# Supplementary material for: High evolutionary turnover of satellite families in Caenorhabditis
Source: PubMed Central journal article supplement (PMC4595182; doi:10.1186/s12862-015-0495-x), 2015-10-05
Supplement: 12862_2015_495_MOESM3_ESM.pdf [file 12862_2015_495_MOESM3_ESM.pdf]

## **“High evolutionary turnover of satellite families in *Caenorhabditis*”**

JA Subirana, MM Albà and X Messeguer

### **Supplementary Figures**

Figure S1. Distribution of repeat sequences in each chromosome of *C. elegans*.

Figure S2. Size of satellites, as a function of their position in each chromosome.

Figure S3. Shared satellite families between pairs of *Caenorhabditis* species.

Figure S4. Distribution of the (ACTACAA)<sub>2</sub> sequence in chromosome I of *C. elegans* and *C. briggsae*.

Figure S5. Histogram of human satellites.

**Figure S1. Distribution of repeat sequences in each chromosome of *C. elegans*.** It is clear that all chromosomes have a similar distribution, with the exception of Chromosome X. Satellites longer than 80 bases have been merged into bins of 20 bases.

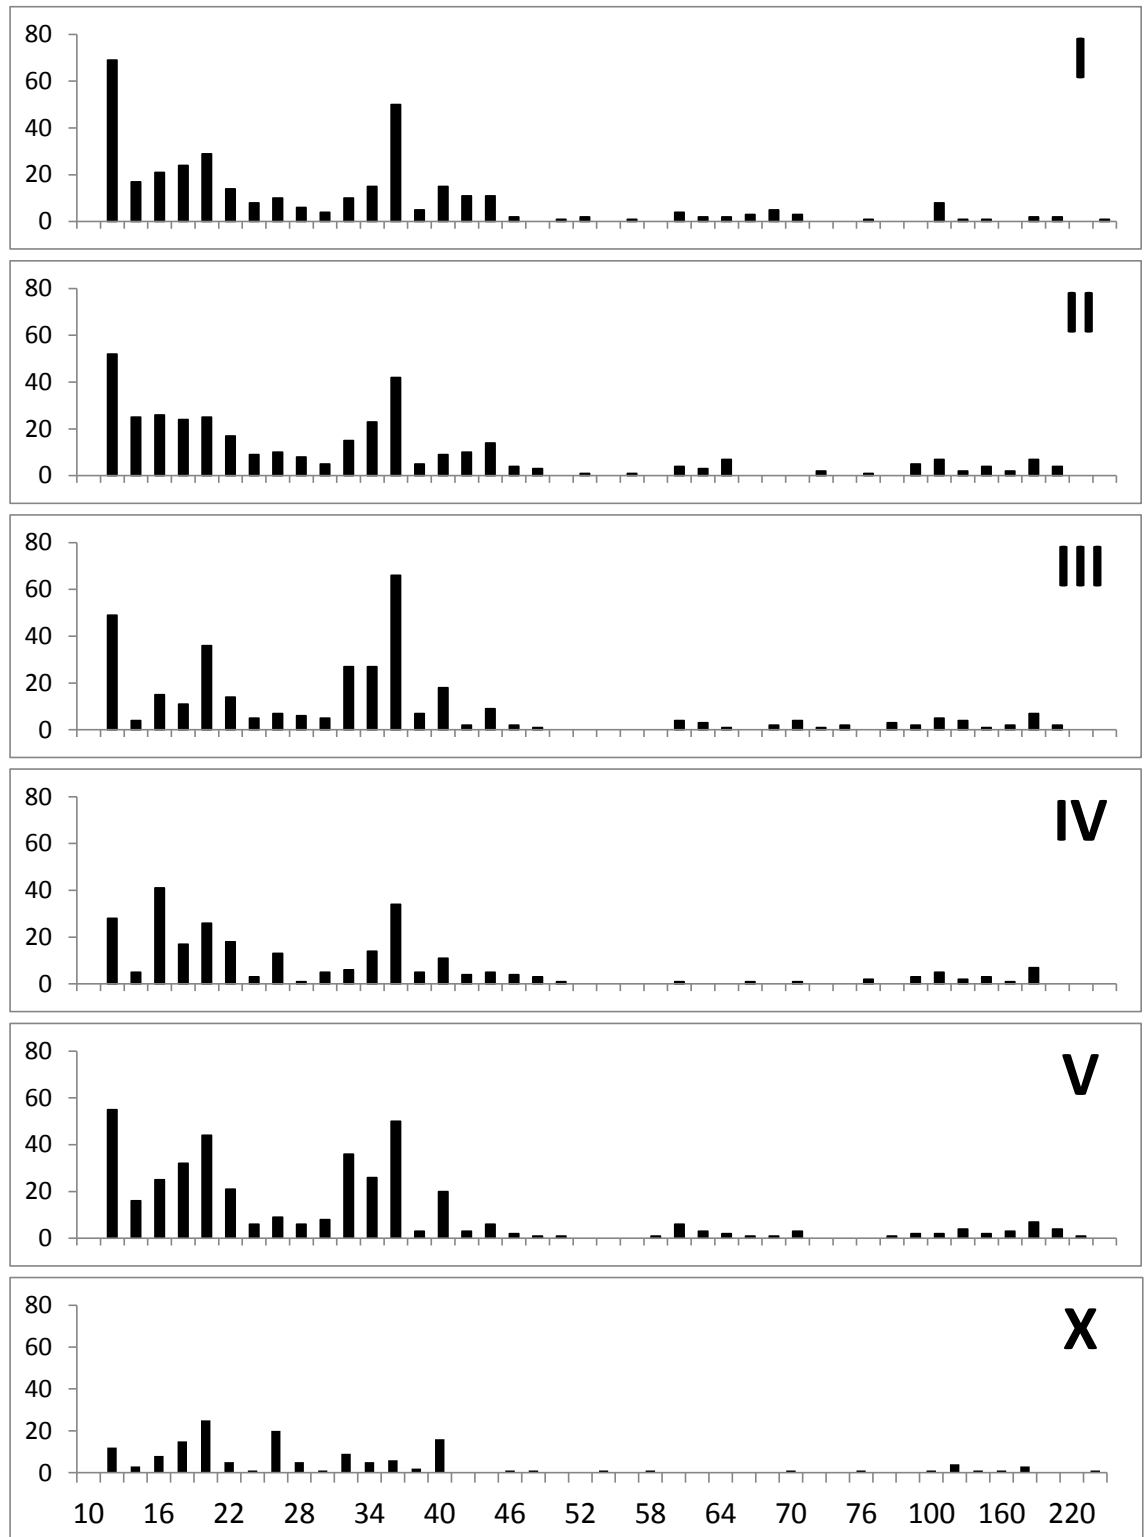

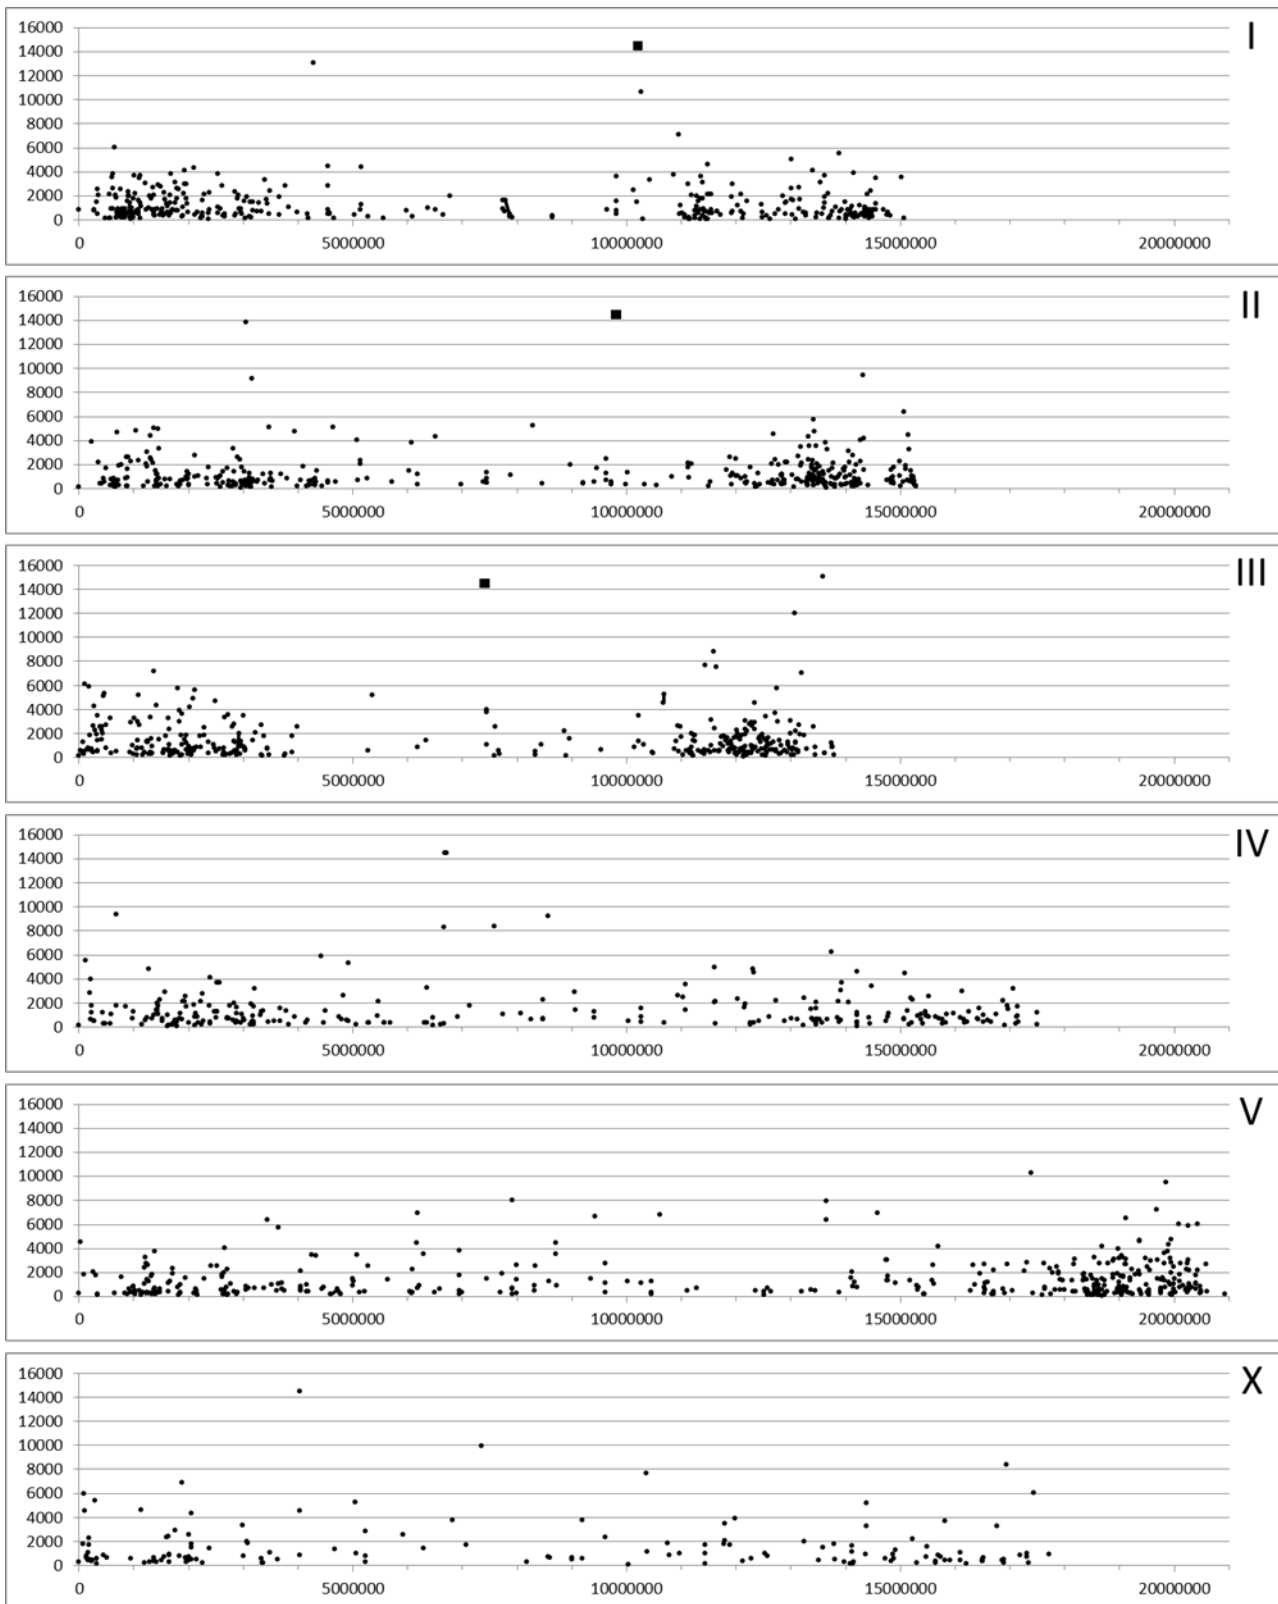

**Figure S2. Size of satellites, as a function of their position in each chromosome.** A few satellites are indicated by a square: they are longer than what is indicated in the figure. A more detailed presentation for chromosome I is given in Figure 2.

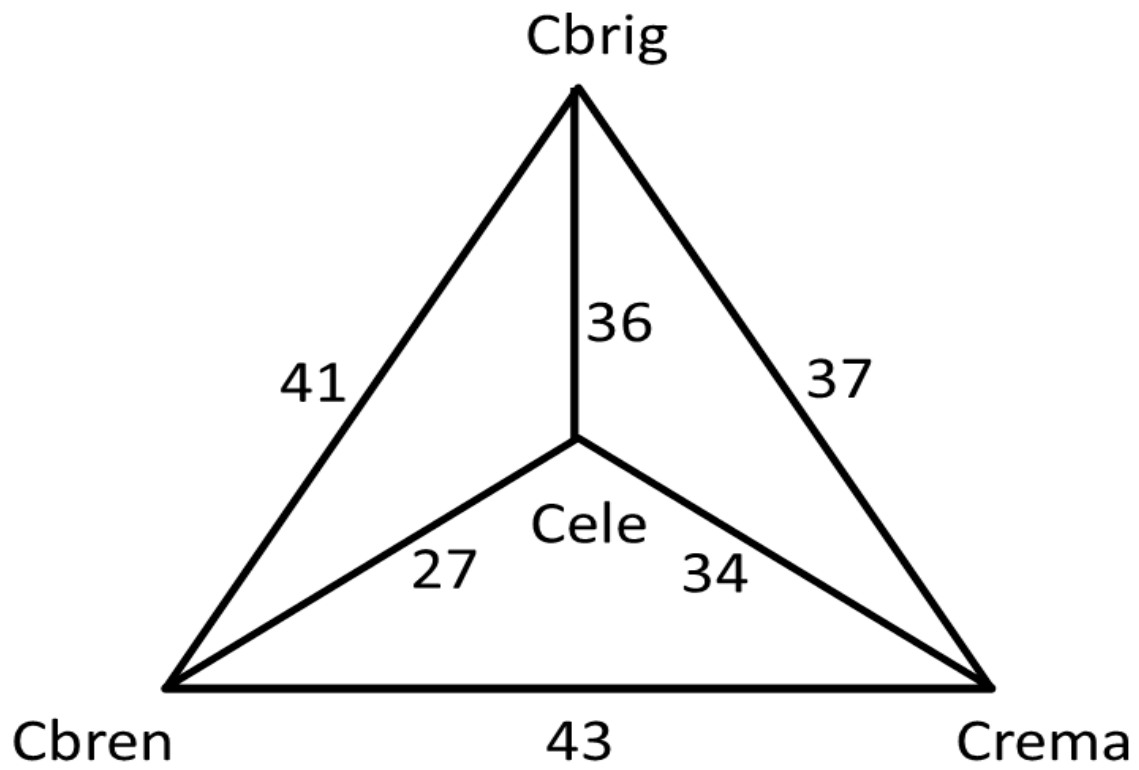

**Figure S3.** Shared satellite families between pairs of *Caenorhabditis* species.

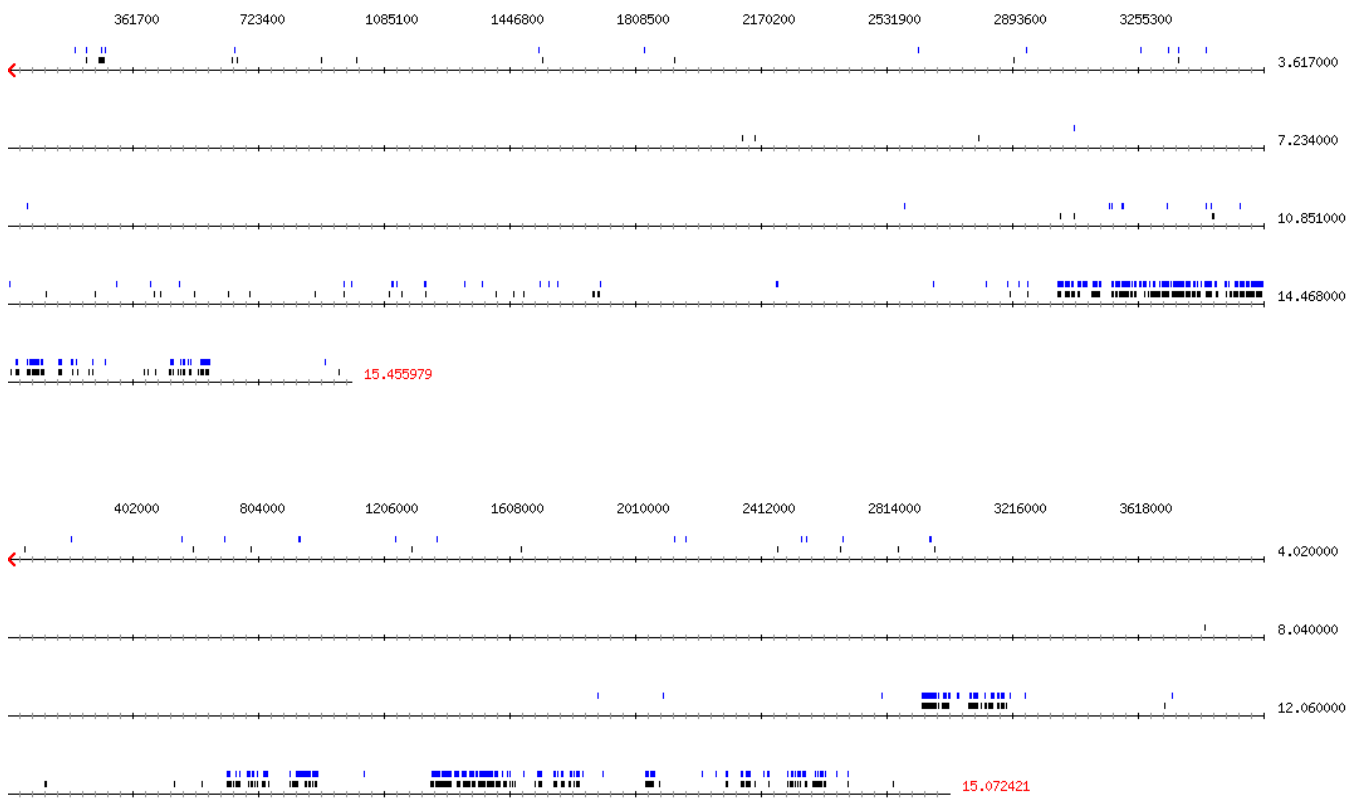

**Figure S4.** Distribution of the (ACTACAA)<sub>2</sub> sequence (black) and its reverse complement (blue) in chromosome I of *C. elegans* (lower frame) and *C. briggsae* (upper frame).

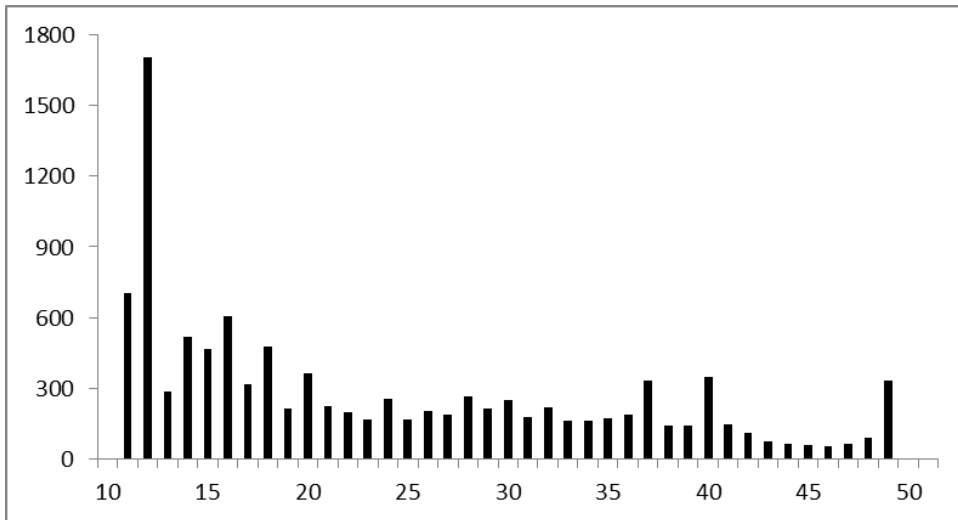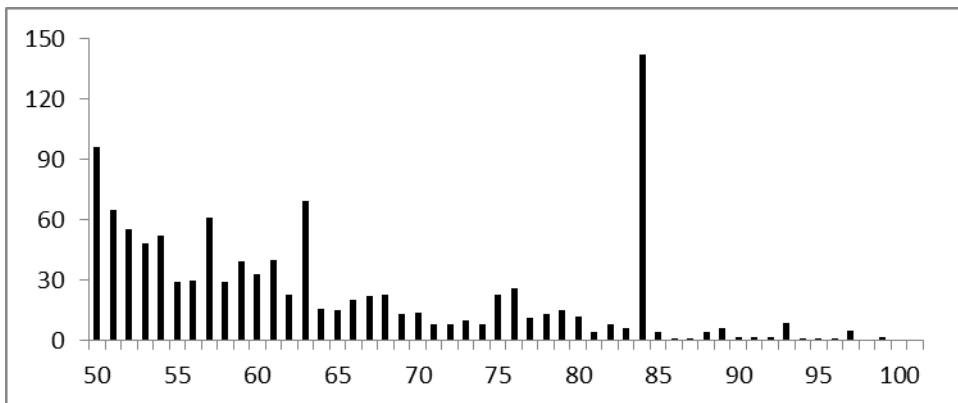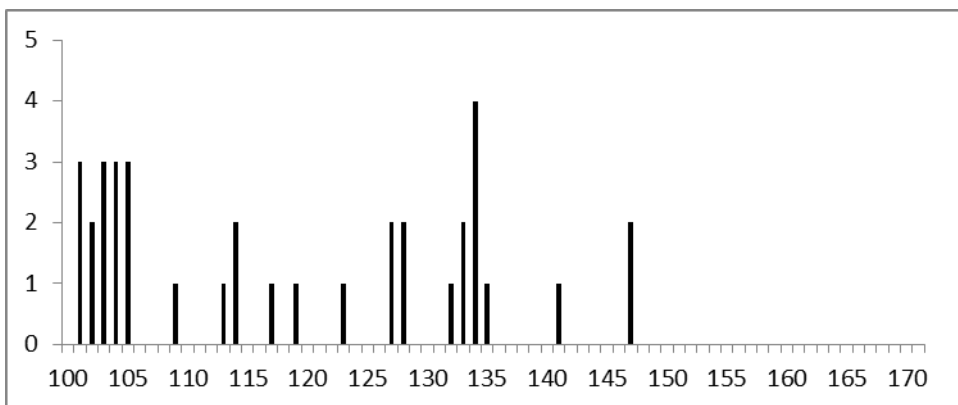

**Figure S5.** Histograms showing the number of human satellites as a function of the length of their repeats.
