# Supplementary material for: High evolutionary turnover of satellite families in Caenorhabditis
Source: PubMed Central journal article supplement (PMC4595182; doi:10.1186/s12862-015-0495-x), 2015-10-05
Supplement: 12862_2015_495_MOESM4_ESM.pdf [file 12862_2015_495_MOESM4_ESM.pdf]

## **“High evolutionary turnover of satellite families in *Caenorhabditis*”**

JA Subirana, MM Albà and X Messeguer

### **Supplementary Tables**

Table S1. Location of satellites in deletions found in natural isolates of *C. elegans*

Table S2. Satellite family members in the chromosomes of *C. elegans*

Table S3. CENP-A score of satellites with long repeats (>150 bases) in *C. elegans*.

Table S4. Chromosome positions of Cele\_Fam\_24\_19\_12: (AT3)<sub>3-4</sub>AATTAAT

Table S5. Complete sequence of all the Cele\_Fam\_24\_19\_12 satellites

Table S6. Alignment of large satellite families in *Caenorhabditis*

Table S7. Satellite families shared by *M. hapla* and *Caenorhabditis*

Table S8. The microsatellites in *Caenorhabditis*

**Table S1. Location of satellites in deletions found in natural isolates of *C. elegans***

Maydan et al. [28] have provided a catalogue of several indels in twelve natural isolates of *C. elegans*, which add up to about 3.2 Mb of the genome (excluding duplications). We have determined the position of satellites in all those indels. We would expect 56.6 satellites distributed throughout these regions, since there are 17.7 satellites/Mb in *C. elegans* (Table 2). Satellites were found only in some of them, with a total number of 58 satellites of different sizes and repeats. Therefore we can conclude that satellites are randomly distributed in the deletions found in the different strains studied by Maydan et al. In order to avoid redundancies, we do not show small indels present as a fraction of longer indels.

| Chr. | Indel    |          |        | Satellite |          |        |        |
|------|----------|----------|--------|-----------|----------|--------|--------|
|      | start    | end      | size   | start     | end      | length | Repeat |
| 1    | 11364959 | 11370480 | 5521   | 11363099  | 11366734 | 3635   | 22     |
| 1    | 13111296 | 13153623 | 42327  | 13149264  | 13151975 | 2711   | 13     |
| 1    | 15016450 | 15028313 | 11863  | 15025303  | 15028836 | 3533   | 21     |
| 2    | 885958   | 894076   | 8118   | 891132    | 892028   | 896    | 59     |
| 2    | 899953   | 912358   | 12405  | 898795    | 901439   | 2644   | 22     |
| 2    | 899953   | 912358   | 12405  | 902801    | 903323   | 522    | 17     |
| 2    | 1535351  | 1593891  | 58540  | 1578533   | 1579326  | 793    | 23     |
| 2    | 1750664  | 1822745  | 72081  | 1796659   | 1797045  | 386    | 34     |
| 2    | 1750664  | 1822745  | 72081  | 1812740   | 1812972  | 232    | 18     |
| 2    | 1750664  | 1822745  | 72081  | 1815685   | 1815917  | 232    | 26     |
| 2    | 1825029  | 1934453  | 109424 | 1892812   | 1893498  | 686    | 26     |
| 2    | 1995557  | 2022712  | 27155  | 2000886   | 2001208  | 322    | 12     |
| 2    | 1995557  | 2022712  | 27155  | 2002111   | 2002471  | 360    | 32     |
| 2    | 1995557  | 2022712  | 27155  | 2008284   | 2009472  | 1188   | 31     |
| 2    | 2063759  | 2138338  | 74579  | 2115413   | 2116408  | 995    | 11     |
| 2    | 2265489  | 2338778  | 73289  | 2329985   | 2330860  | 875    | 40     |
| 2    | 2344994  | 2353289  | 8295   | 2348338   | 2348687  | 349    | 33     |
| 2    | 2521667  | 2546368  | 24701  | 2525627   | 2526075  | 448    | 18     |
| 2    | 2521667  | 2546368  | 24701  | 2526938   | 2527351  | 413    | 12     |
| 2    | 2521667  | 2546368  | 24701  | 2529568   | 2530452  | 884    | 35     |
| 2    | 3196064  | 3249275  | 53211  | 3246628   | 3247181  | 553    | 20     |
| 2    | 3335696  | 3363341  | 27645  | 3361867   | 3363047  | 1180   | 43     |
| 2    | 3672299  | 3693900  | 21601  | 3691106   | 3692335  | 1229   | 31     |
| 2    | 13610426 | 13617819 | 7393   | 13612519  | 13612876 | 357    | 14     |
| 2    | 14982543 | 14985471 | 2928   | 14984063  | 14985128 | 1065   | 20     |
| 3    | 949229   | 973819   | 24590  | 951024    | 953927   | 2903   | 12     |
| 3    | 1295561  | 1307017  | 11456  | 1299749   | 1303117  | 3368   | 25     |
| 3    | 1311955  | 1316567  | 4612   | 1312378   | 1312777  | 399    | 21     |
| 3    | 1311955  | 1316567  | 4612   | 1314691   | 1315015  | 324    | 21     |
| 3    | 1346343  | 1409647  | 63304  | 1362848   | 1369996  | 7148   | 10     |
| 3    | 1893285  | 1895451  | 2166   | 1890358   | 1894009  | 3651   | 19     |
| 3    | 12320776 | 12322654 | 1878   | 12320572  | 12322233 | 1661   | 35     |
| 4    | 2563486  | 2594976  | 31490  | 2572290   | 2575957  | 3667   | 164    |

|   |          |          |        |          |          |       |     |
|---|----------|----------|--------|----------|----------|-------|-----|
| 4 | 4124569  | 4166385  | 41816  | 4142135  | 4142511  | 376   | 12  |
| 4 | 17134566 | 17145165 | 10599  | 17138350 | 17140071 | 1721  | 184 |
| 4 | 17134566 | 17145165 | 10599  | 17140409 | 17141319 | 910   | 15  |
| 5 | 1274592  | 1274909  | 317    | 1273381  | 1274666  | 1285  | 35  |
| 5 | 3247858  | 3433564  | 185706 | 3373169  | 3373914  | 745   | 21  |
| 5 | 4783636  | 4788086  | 4450   | 4784583  | 4784785  | 202   | 16  |
| 5 | 15282820 | 15399718 | 116898 | 15295228 | 15296185 | 957   | 35  |
| 5 | 15282820 | 15399718 | 116898 | 15320755 | 15321325 | 570   | 40  |
| 5 | 15282820 | 15399718 | 116898 | 15321461 | 15322267 | 806   | 15  |
| 5 | 17238425 | 17347568 | 109143 | 17265086 | 17267237 | 2151  | 156 |
| 5 | 17238425 | 17347568 | 109143 | 17308688 | 17311507 | 2819  | 11  |
| 5 | 17371630 | 17489726 | 118096 | 17384209 | 17394484 | 10275 | 59  |
| 5 | 17371630 | 17489726 | 118096 | 17412041 | 17412354 | 313   | 19  |
| 5 | 17491246 | 17588401 | 97155  | 17587172 | 17587321 | 149   | 12  |
| 5 | 17801810 | 17820902 | 19092  | 17817696 | 17818236 | 540   | 34  |
| 5 | 18186552 | 18247813 | 61261  | 18190373 | 18190779 | 406   | 11  |
| 5 | 18678249 | 18684222 | 5973   | 18679671 | 18683869 | 4198  | 18  |
| 5 | 18770400 | 18776232 | 5832   | 18774110 | 18774554 | 444   | 11  |
| 5 | 19230781 | 19237263 | 6482   | 19229066 | 19231343 | 2277  | 12  |
| 5 | 19230781 | 19237263 | 6482   | 19232563 | 19232783 | 220   | 12  |
| 5 | 19390251 | 19469469 | 79218  | 19402218 | 19402465 | 247   | 17  |
| 5 | 19480251 | 19492283 | 12032  | 19488470 | 19489504 | 1034  | 17  |
| 5 | 19833649 | 19846181 | 12532  | 19836950 | 19837768 | 818   | 33  |
| 5 | 20435644 | 20439262 | 3618   | 20432075 | 20438121 | 6046  | 180 |
| 6 | 1752189  | 1778099  | 25910  | 1752274  | 1755174  | 2900  | 27  |

**Table S2.****Satellite family members in the chromosomes of *C. elegans***

In this table the families are ordered by increasing length of the repeat.. Only families with more than 9 members are shown. The consensus sequence of each family is given in Additional file 2. Members with one asterisk are shared with other species. All other families are species specific in *C. elegans*.

| Family                   | I   | II  | III | IV  | V   | X   | Total number | Special features                  |
|--------------------------|-----|-----|-----|-----|-----|-----|--------------|-----------------------------------|
| 4_11                     | 16  | 19  | 13  | 12  | 17  | 5   | 82           | Related to <i>Helitron 2_CE</i>   |
| 18_11*                   | 3   | 1   | 8   | 1   | 1   | 0   | 14           |                                   |
| 2_12*                    | 50  | 48  | 40  | 14  | 47  | 4   | 203          | Telomeric                         |
| 23_12*                   | 5   | 4   | 2   | 1   | 0   | 1   | 13           | Hexamer dimer                     |
| 11_14*                   | 11  | 12  | 0   | 2   | 8   | 0   | 33           | Heptamer dimer                    |
| 5_15                     | 8   | 8   | 8   | 24  | 11  | 6   | 65           | Related to <i>Helitron Y4_CE</i>  |
| 12_16                    | 1   | 9   | 5   | 9   | 5   | 0   | 29           | Octamer dimer                     |
| 14_17*                   | 6   | 2   | 0   | 6   | 4   | 0   | 18           |                                   |
| 15_17*                   | 3   | 3   | 2   | 3   | 2   | 4   | 17           |                                   |
| 25_18                    | 0   | 0   | 0   | 0   | 10  | 1   | 11           |                                   |
| 6_19                     | 10  | 2   | 19  | 5   | 13  | 2   | 51           |                                   |
| 10_19                    | 5   | 2   | 10  | 5   | 9   | 5   | 36           |                                   |
| 16_19*                   | 0   | 1   | 0   | 0   | 14  | 0   | 15           |                                   |
| 24_19                    | 1   | 3   | 0   | 3   | 0   | 5   | 12           | Mixed with 23-mer                 |
| 17_20*                   | 1   | 4   | 3   | 0   | 5   | 1   | 14           | Found in <i>Helitrons</i>         |
| 22_22*                   | 1   | 5   | 3   | 4   | 0   | 0   | 13           |                                   |
| 8_25                     | 5   | 7   | 5   | 5   | 7   | 9   | 38           |                                   |
| 21_26                    | 3   | 1   | 1   | 1   | 2   | 5   | 13           |                                   |
| 26_31                    | 0   | 0   | 10  | 0   | 0   | 0   | 10           | Pairing centers                   |
| 13_32                    | 0   | 0   | 0   | 0   | 20  | 2   | 22           | Pairing centers                   |
| 1_35                     | 44  | 36  | 72  | 20  | 40  | 1   | 213          | Most abundant                     |
| 3_34                     | 14  | 15  | 18  | 26  | 39  | 12  | 124          | Found in <i>Helitrons</i>         |
| 20_37                    | 2   | 1   | 7   | 2   | 0   | 1   | 13           | Related to 3_34                   |
| 7_40                     | 9   | 5   | 6   | 7   | 8   | 12  | 47           | Related to <i>Helitron Y4_CE</i>  |
| 9_43                     | 9   | 10  | 9   | 2   | 6   | 0   | 36           | Related to 1_35                   |
| 19_59                    | 1   | 3   | 4   | 1   | 4   | 0   | 13           | Centromere-like                   |
| <b>Total in families</b> | 208 | 201 | 245 | 153 | 272 | 76  | 1155         | Families with more than 9 members |
| <b>Total in genome</b>   | 321 | 354 | 332 | 241 | 396 | 135 | 1779         |                                   |

**Table S3 . CENP-A score of satellites with long repeats (>150 bases) in *C. elegans*.**

Satellites with a repeat of 59 bases and a high CENP-A score are also included in the Table.

| Position | Satellite length | Number of repeats | Repeat length | CENP-A score |
|----------|------------------|-------------------|---------------|--------------|
| Chr I    |                  |                   |               |              |
| 338563   | 2587             | 14                | 184           | 1.544        |
| 1026802  | 2177             | 12                | 182 (60)      | 1.073        |
| 9816009  | 3628             | 14                | 200 (26)      | 1.154        |
| 10851619 | 3760             | 23                | 163           | 0.976        |
| 13149264 | 2712             | 14                | 224 (13)      | 1.539        |
| Chr II   |                  |                   |               |              |
| 776994   | 1966             | 12                | 163           | 1.226        |
| 1094273  | 2358             | 11                | 161           | 0.809        |
| 2949871  | 2395             | 10                | 155           | 0.811        |
| 3159311  | 9176             | 55                | 162           | 1.070        |
| 6073584  | 3812             | 21                | 181           | 2.186        |
| 9807896  | 17344            | 292               | 59            | 1.503        |
| 11190043 | 2046             | 12                | 202 (90)      | 0.999        |
| 13428517 | 4784             | 24                | 165           | 1.076        |
| 14322264 | 9454             | 43                | 185           | 1.339        |
| 14333333 | 4159             | 25                | 166           | 1.142        |
| Chr III  |                  |                   |               |              |
| 99472    | 6101             | 35                | 178           | 2.302        |
| 448145   | 5086             | 21                | 164           | 2.201        |
| 1017321  | 3256             | 55                | 59            | 1.114        |
| 1362848  | 7149             | 44                | 162 (11)      | 1.182        |
| 2077622  | 4889             | 29                | 168           | 1.781        |
| 11593322 | 8828             | 48                | 184           | 1.705        |
| 11639888 | 7523             | 35                | 163           | 1.192        |
| 13074654 | 11986            | 206               | 59            | 1.297        |
| 13414618 | 2540             | 13                | 198 (64)      | 1.398        |
| Chr IV   |                  |                   |               |              |
| 2572290  | 3668             | 16                | 164           | 1.156        |
| 4822586  | 2633             | 16                | 163 (36)      | 1.011        |
| 6668156  | 8287             | 46                | 182           | 1.113        |
| 6682649  | 21927            | 125               | 172           | 1.114        |
| 6708756  | 22979            | 130               | 174           | 1.118        |
| 12169268 | 1954             | 24                | 59            | 1.021        |
| 15225055 | 2294             | 12                | 168           | 1.225        |
| 15510686 | 2554             | 12                | 168           | 1.119        |
| 17138350 | 1722             | 11                | 184           | 1.330        |
| Chr V    |                  |                   |               |              |
| 265076   | 2070             | 12                | 172           | 1.127        |
| 1201997  | 2418             | 13                | 185           | 1.326        |
| 1704637  | 1954             | 13                | 163           | 1.090        |
| 4244047  | 3476             | 18                | 200           | 0.972        |
| 9428478  | 6646             | 31                | 214 (32)      | 0.976        |
| 14584093 | 6934             | 32                | 162           | 0.999        |
| 16330572 | 2637             | 16                | 164           | 1.052        |
| 17265086 | 2152             | 12                | 156           | 1.431        |
| 17384209 | 10276            | 173               | 59            | 0.928        |
| 18512827 | 1516             | 10                | 151           | 0.749        |
| 20106050 | 1857             | 10                | 185           | 0.692        |
| 20432075 | 6047             | 28                | 180           | 1.736        |
| Chr X    |                  |                   |               |              |
| 2991962  | 3370             | 27                | 167           | 1.352        |
| 5048783  | 5263             | 24                | 226           | 0.846        |
| 10749197 | 1878             | 10                | 214           | 0.991        |
| 16931765 | 8401             | 47                | 151 (57)      | 1.150        |

The repeat length of some satellites has been corrected, since they have an internal repeat of the seed motif. In such cases the value given in parenthesis corresponds to the uncorrected value reported by SATFIND.

**Table S4. Chromosome positions of Cele\_Fam\_24\_19\_12: (AT3)<sub>3-4</sub>AATTAAT**

| Chromosome | Length (bases) | Position   | Properties                                                                       |
|------------|----------------|------------|----------------------------------------------------------------------------------|
| I          | 165            | 4281275    | Intergenic                                                                       |
| I          | 840            | 12782330-r | Intergenic                                                                       |
| II         | 842            | 4308301    | Intergenic                                                                       |
| II         | 604            | 9719108    | Intergenic                                                                       |
| II         | 353            | 9719725-r  | Intergenic. Neighbor of previous satellite                                       |
| IV         | 139            | 1639370    | Intron                                                                           |
| IV         | 180            | 2124726    | Intron                                                                           |
| IV         | 616            | 13461609   | Intergenic. Contains inserted <i>Helitron</i>                                    |
| V          | 229            | 4554501    | Intergenic. Contains inverted satellite                                          |
| X          | 560            | 2004045    | Intergenic. Placed between two <i>Helitrons</i>                                  |
| X          | 995            | 2008253    | Intergenic. Contains inserted <i>Helitron</i>                                    |
| X          | 286            | 5227453    | Intergenic. Contains inverted satellite                                          |
| X          | 1224           | 5230918-r  | Intergenic. Neighbor of previous satellite.<br>Contains inserted <i>Helitron</i> |
| X          | 580            | 9189061-r  | Intron                                                                           |
| X          | 564            | 12276204   | Intergenic. Includes a short inversion                                           |

r indicates that it is a reverse complement sequence

**Table S5. Complete sequence of all the Cele\_Fam\_24\_19\_12 satellites:  
(ATTT)<sub>3-4</sub>AATTAAT (19-23 bases)**

This satellite family is specific for *C. elegans*. Its repeat is completely absent in all other *Caenorhabditis*. The AATTAAT sequence is shown in blue in this Table. Point mutations are shown in red. Related repeated sequences in some satellites are separated by an empty line. At the beginning of the Table four short satellites are shown, which were not detected by SATFIND, due to their small size. We have also recovered a related satellite (Chromosome X-5230918), which had been rejected by SATFIND due to its irregular sequence.

The first step in the appearance of this satellite was probably a partial duplication of the motif with 23 bases, which gave rise to a longer motif with 42 bases (19 + 23). Subsequent duplications originated longer satellites. Inspection of the Table demonstrates that these satellites grew further by unequal crossing-over, as shown by the distribution of point mutations, usually of fragments of about 120-200 bases. This is clearly apparent in Cele.WS201\_1:12782330-12783169 and in many other satellites. In some cases point mutations appeared before crossing-over, but in other cases the satellites grew before any apparent point mutation. If we classify the satellites by the number of point mutations and the relative distribution of motifs with either three or four ATTT units, it appears that individual satellites have different ages. Old satellites have acquired more point mutations than younger satellites.

Two clearly transposed sequences in the X chromosome are shown in green. The two satellites involved are separated by about 4 Kb which contain one *Helitron* (Y2\_CE4) and a LINE sequence (RTE1). These two elements might have facilitated the local transposition detected. At the end we present a few related sequences which might correspond to degraded satellites.

> 4281275 chromosome I  
GGCAAAA  
ATTTATTTATTTATTTAATTAAT  
ATGTATTTATTTAATTAAT  
ATTTATTTATTTATTTAATTAAT  
ATTTATTTATTTAATTAAT  
ATTTATTTATTTATTTAATTAAT  
ATTTATTTATTTAATTAAT  
ATTTATTTCTTTAATTAAT  
ATTTTCGATGCTCT

> 1639370 chromosome IV  
ATTGAGCCA  
ATTTATTTAATTAAT  
ATTTATTTATTTAATTAAT  
ATGTATTTATTTAATTAATTAAT  
ATTTATTTATTTAATTAAT  
ATTTATTCATTTAATTAAT  
AATTATTTATTTATTTAATTAAT  
CAGAACATTTTA

> 2124726 chromosome IV reverse complement  
AAT  
ATTTATTTATTTAATTAAT  
ATTTATTTATTTATTTAATTAAT  
ATTTTATTTATTTAATTAAT  
ATTTATTTATTTATTTAATTAAT  
ATTTTATTTATTTAATTAAT  
ATTTATTTATTTAATTAATTAAT  
ATTTATTTATTTAATTAATTAAT  
ATTTATTTATTTAATTAAT  
ATTTATTTA

> 4554501 chromosome V. Contains inverted repeat  
TTTACCGATTTAAATAAT  
ATTTATTTATTTAATTAATTAAC  
ATTTATTTATTTAATTAAT  
ATTTAATTATTTATTTAATTAAT  
ATATATTTATTTAATTAAT  
ATTTATTTATTTAATTAAT  
ATTTATTTATTTATTTAATTAAT  
ATTTATTTA (Inverted)  
AAATAAATAAATAAAT  
ATTAATTAAATAAATAAATAAAT  
ATTAATTAAATAAATAAAT  
ATTAATC  
ATTTACTATATA



> Rev.of:Cele.WS201\_1:12782330-12783169

ATTTATTTATTTAATTAAT  
ATTTATTTGTTTATTTAATTAAT  
ATTTATTCATTTATTTAATTAAT  
ATTTGTTTATTTATTTAATTAAT  
ATTTATTTATTTAATTAAT  
ATTTATTTATTTATCTAATTAAT  
ATTTATTTATTTAATTAAT  
ATTTATTTATTTAATTAAT  
ATTTATTTATTTAATTAAT

ATTTATTTATTTATTTAATTAAT  
ATTTATTTGTTTATTTAATTAAT  
ATTTATTCATTTATTTAATTAAT  
ATTTGTTTATTTATTTAATTAAT  
ATTTATTTATTTAATTAAT  
ATTTATTTATTTATCTAATTAAT  
ATTTATTTATTTAATTAAT  
ATTTATTTAATTAAT  
TTTTATTTATTTAATTAAT

ATTTATTTATTTATTTAATTAAT  
ATTTATTTATTTAATTAAT  
ATTTATTTATTTATTTAATTAAT  
ATTTATTTGTTTATTTAATTAAT  
ATTTATTCATTTATTTAATTAAT  
TTTTATTTATTTAATTAAT

ATTTATTTATTTATTTAATTAAT  
ATTTATTTATTTAATTAAT  
ATTTATTTATTTATTTAATTAAT  
ATTTATTTGTTTATTTAATTAAT  
ATTTATTCATTTATTTAATTAAT  
ATTTATTTATTTAATTAAT

ATTTATTTATTTATTTAATTAAT  
ATTTATTTATTTAATTAAT  
ATTTATTTATTTATTTAATTAAT  
ATTTATTTGTTTATTTAATTAAT  
ATTTATTCATTTATTTAATTAAT  
ATTTATTTATTTAATTAAT  
ATTT



> Cele.WS201\_2:9719108-9719711

TTATTTAATTAAT

ATTTATTTATTTAATTAAT  
ATTCATTTATTTATTTGATTAAT  
ATTTCTTTATTTAATTAAT  
ATTTATTTATTTAATTAAT  
ATTTATTTATTTAATTAAT  
ATTTATTTATTTATTTAATTAAT  
ATTTATTTATTTAATTAAT

ATT-ATTTAATTAAT  
ATTTATTTATTTATTTGATTAAT  
ATTTCTTTATTTAATTAAT  
ATTTATTTATTTAATTAAT  
ATTTATTTATTTAATTAAT  
ATTTATTTATTTATTTAATTAAT  
ATTTATTTATGTAATAAT  
ATTTATTTATTTAATTAAT

ATTTATTTAATTAAT  
ATTTATTTATTTAATTAAT  
ATTTATTTATTTATTTAATTAAT  
AATTATTTATGTAATAAT  
ATTTATTTATTTAATTAAT  
ATTTATTTAATTATTTAATTAAT  
ATTTATTTATTTAATTAAT  
ATTTATTTATTTATTTAATTAAT  
ATTTATTTATTTAATTAAT  
ATTTATTTATGTAATAAT  
ATTTATTTATTTAATTAAT  
ATTTATTTATTTATTTAATTAAT  
ATTTAT

> Rev.of:Cele.WS201\_2:9719725-9720077. Next to previous satellite.

TAAT  
ATTTATTTATTTAATTAAT

ATTTATTTATTTAATTAAT  
ATTTATTTATTTATTTCAATTAAT  
ATTTATATATTTAATTAAT  
ATTTATTTATTTAATTAAT  
ATTTATTTATTTATTTAATTAATA  
ATTTATTTATTTAATTAAT  
ATTTATTTATTTAATTAAT  
-TGTTTTATTTAATTAAT  
ATTTATTTATTTATTTAATTAAT

ATTTATTTATTTAATTAAT  
ATTTATTTATTTATTTCAATTAAT  
ATTTATATATTTAATTAAT  
ATTTATTTATTTAATTAAT  
ATTTATTTATTTATTTAATTAAT  
ATTTATTTATTTAATAATTAAT  
ATTTATTTATTTAATTAAT  
ATTTAT



> Cele.WS201\_6:2004045-2004604

AT

ATTTATTTATTTAATTAAT  
ATTTATTTATTTAATTAAT  
ATTTATTTATTTAATTTAT  
ATTTATTTATTTATTTAATTAAT  
ATTTATTTACTTAATTAAT  
ATTTATTTATTTAATTAAT  
ATTTATTTATTTACCTAATTAAT  
ATTTATTTATTTAATTAAT  
ATTTATTTATTTATTTAATTAAT  
ATTTATTTATTTAATTAAT  
ATTTATTTATTTAATACTAAT  
ATTTATTTATGTATTTAATTAAT  
ATTTATTTATTTATTTCAATTAAT  
ATTTATTTATTTCAATTAAT  
ATTTATTTATTTAATTAAT  
ATTTATTTATTTACTTAATTAAT  
ATTCATTTATTTAATTAAT  
ATTTATTTATTTAATTAAT  
ATTTATTTATTTATTTAATTAAT  
ATTTATTTAAGTAATTAAT  
ATTTATTTATTTATTTAAT  
ATTTATTTATTTATTTAAT  
ATTTATTTATTTAATTAAT  
ATTTATTTATTTAATTAAT  
ATTTATTTATTTATTTAATTAAT  
ATTTATTTATTTATTTAATAAAT  
ATTTATTTATTTAATTAAT  
ATTTATTT





>5230918 chromosome X reverse complement. With an inserted *Helitron* sequence

TATTTAATTATT  
ATTTATTTATTTAATTAAT  
ATTTATTTATTTAATTAAT  
ATTTATTTATTTATTTGATTAAT  
ATTTATTTATTTAATTAATTAAT  
ATTTATTTATTTATTTAAT  
ATTTATTTATTTAATATTTAAT  
ATTTATTTATTTGTTAAT  
ATTTATTTATTTAATTTAATTAAT  
ATTTATTTATTTAATTAAT  
ATTTATTTATTTAATTATT  
ATTTATTTATTTAATTAAT  
ACTTATTTTTTTAATTAAT  
ATTTATTTATTTAATTATT  
ATTTATTTATTTAATTAAT  
ATTTATTTATTTAATAAT  
ATTTATTTATTTAATTAAT  
ATTTATTTATTTATTTAATTAAT  
ATTTATTTATTTATTTAATTAAT  
ATTT-TTTATTTAATTAAT  
ATTTATTTATTTAATTATT  
ATTTATTTATTTAATTATT  
ATTTATTTATTTAATTAAT  
ATTTATTTATTTAATTAAT  
ATTTATTTATTTAATTATT  
AATTGTTTATTTAATTAAT  
ATTTATTTAT  
CATTACCTATATATAAAAAAATAGTGTCGTTTGTTA  
AGAAGTGACGTCATAGCTTACACAGGCAAGGCGTTTT  
CGGCTGTTGGAGGGATATTAGTTTGGGGTATTTAATTATT  
ATTTATTTATTTAATTAAT  
ATTTATTTATTTAATTAAT  
ATTTATTTATTTATTTGATTAAT  
ATTTATTTATTTAATTAATTAAT  
ATTTATTTATTTATTTAAT  
ATTTATTTATTTAATATTTAAT  
ATTTATTTATTTGTTAAT  
ATTTATTTATTTAATTTAATTAAT  
ATTTATTTATTTAATTAAT  
ATTTATTTATTTAATTATT  
ATTTATTTATTTAATTAAT  
ACTTATTTTTTTAATTAAT  
ATTTATTTATTTAATTAAT  
ATTTATTTATTTAATTGAT  
ATTTATTTATTTAATTATT  
ATTGATTTATTTAATTAAT  
ATTTATTTATTTATTTAATTAAT  
ATTTATTTATTTATTTAATTAAT  
ATTTATTTATTTATTTAATTAAT  
ATTT-TTTATTTAATTAAT  
ATTTATTTATTTAATTATT  
ATTTATTTATTTAATTATT  
ATTTATTTATTTAATTAAT  
ATTT-TTTATTTAATTAAT  
ATTTATTTATTTAATTATT  
ATTTATTTATTTAATTAAT  
ATTTATTTATTTAATTAAT  
ATTTATTTATTTAATTATT  
AATTGTTTATTTAATTAAT  
ATTTATTTAT



> Rev.of:Cele.WS201\_6:9189061-9189640

TTAATTAAT

ATTTATTT-TTTAATTAAT

ATTTATTTATTTAATTAATTAAT

ATTTATTTATT-AATTAAT

ATTTATTTATTTAATTAAT

ATTTATTTTTTTAATTAAT

ATTTATTTAATTAAT

ATTTATTTGTTTATTTAATTAAT

ATCTATTTATTTAATTAAT

ATTTATTTATTTAATTAAT

ATTTATTTATTTAATTAAT

ATTTATTTATTTAAT

ATTTATTTATTTAATTAATTAAT

ATTTATTTATTTAATTAAT

ATTTATTTATTTATTTAATTAAT

ATTTATTTATTTATTTAATTAAT

ATTTATTTATTTAAT

ATTTATTTATTTAATTAAT

ATTTATTTATTTAATTAAT

ACTTATTTATTTAATTAAT

ATTTATTTGTTCAATTAATTAAT

ATTTATTTATTTAATTAAT

ATTTATTTATTTAATTAAT

ATTCATTTATTTAATTAAT

ATTTATTTATTTAATTAAT

ATTTATTTATTTATTTAATTAAT

ATTTATTTATTTATTTAATTAAT

ATTTATTTATTTAATTAAT

ATTTATTTATTTAATTATT

ATTTATTTATTTAATTAAT

A

> Cele.WS201\_6:12276204-12276767 Contains short inverted sequence

TTTAATTAAT  
ATTTATTTATTTAATTAAT  
ATTTATTTATTTAATTAAT  
ATTTATTCATTTAATTAATTAAT  
ATTTATTTATTTAATTAAT  
ATTTATTTATTTAATTAAT  
ATTTATTTATTTAATTAAT  
ATTTATCTATTTATTTAATTAAT  
ATTTATTTATTTAATTAAT  
ATTTATTTATTCAATTAATTAAT  
ATTTATTTATTTAATTAAT  
ATTTATTTATTTAATTAAT  
ATTTATTTATTTAATTAAT  
ATATATTTATTTATTTAATTAAT  
ATATATTTATTTAATTAAT  
ATTTATTTATTTATTTAAT  
ACCTTATCTATTTAATTAGT  
ATTTATTTTTTTAATTAAT  
ATTTATTTATTTAATTAAT  
ATTTATTTATTCAATTGAT  
ATTTATTTTTTCATTTAAT  
ATTTATTTATTCAATTAAT  
ATTTATTTATTTAATTAAT  
ATTTATTTTTTTATTTAAT  
AAATAAAATATTAATTAATA  
AATTATTTATTTAATTAAT  
ATTTATGTATTTAATTAAT  
ATGAATTTATTTAATTAAT  
ATTTATTTATTTAATTAAT

## Sequences related to Cele\_Fam\_24\_19\_12

>ce6\_dna range=chrII:11467601-11467800 strand=-  
CAACGCGTGAGCTTCCAGATACTCGATGAGCTGGTCAACGATTGGAGGGA  
TGTTTCCACCACAGTGAGACAGGATGCTGAAA  
**ATTT**GTTTATCTTAATATTAATTA  
**ATTTATTTATTTAATTAAT**  
TTAGTTTATAAAAAT  
CACGTTTGAATGAC**ATTT**CTGGGAAAACGTGGGAA**ATTT**ATTGGAAAAAAAATTCTAA

>ce6\_dna range=chrIV:13456651-13456900 strand=-  
CTCATATTGGGTCATTACTTTTCCTT**ATTT**ACTGTACCTTT  
**ATTTATTTATTTATTTATTT**GATTAAT  
**ATTTATTTATTTATTTAAT**  
**ATTTATTTTATTAATTT**  
**ATTTT**TATTA**ATTTATTTAATTAAT**  
**ATTTATTTATTTAATTAAT**  
**ATTTATTTATTTATTTAATTAAT**  
**ATTTATTTATTCATTTAATTAAT**  
AATTAATAATTAATAATAAAC**ATTT**CTGTAACTACGTGAAGCTTCTTGTACCTACTGG

>ce6\_dna range=chrIV:13884851-13885050 strand=+  
TGACGTCACAGACTACAAAGACTACATAGACT**ATTT**TTAAATTGAT  
**ATTTATTTATTTAATTAAT**  
**TAATTAAT**  
**ATTT**TTTTATTTATTT**TAATTAAT**  
**ATTTATTTATTTATTT**AAATAAT  
**ATTTATTTATTTA**  
TC**ATTT**ACTATATATAAA  
GCGCGTGTCTTCTGTCCCTATGTAGTTTGATCTTTGATCAGAGCAACGA

>ce6\_dna range=chrIV:13994001-13994200  
TATTTTCACAACCTTACTTACTAA**AATATTT**CAAGTTCAGTTTCAACGCGG  
AACCAAGATTTTCCAAACTCTTTTTAGCTAGAAAAAGCTTGTACATTTTC  
AAAGTATTGATTAGAGAGT  
TGATATTTTTAA**ATTTATTTAATTA--ATTTATTTATTTAAT**GGGTCTCTTT  
TAATCTTACGACTTTCAAAAAAAAAAAAAACG

>ce6\_dna range=chrV:4602651-4602850 strand=-  
AAGAAGTTATG**ATTT**TTGACCCGGA**ACTTATTT**GGAGACCTAATAATTCAAAAACAAT  
**ATTTATTTTATTTT**  
TTTT**ATTTATTTAATTAATTA**  
**ATTT**TTTTT**ATTTAATTGATGAATTAATTCATTAATTT**TTGGAAAATACTTA  
**ATTT**GGAAAATACTCATTAGAACACAAG**ATTT**GTTACAAAATGTCTAGAGG

**Table S6. Alignment of large satellite families in *Caenorhabditis***

>All.fam\_Fam\_1\_20\_5 Nr. of seq. 5 Alignment length(with gaps) = 21 Alignment score = 0.585714

```
Cbren.WS247_Fam_47_18_7      AAATTC-CG-AAAATTCT-GA
Cele.WS201_Fam_321_19_1     AAACTCGAG-AAAATTCT-GA
Cbren.WS247_Fam_33_20_9     ANCTTCCAGAAAC-TTCTAGA
Rev.of:Cbrig.WS247_Fam_11_20_22 AAATTCAG-AACATTCTAGA
Cele.WS201_Fam_319_20_1     AAATTCAG-AAGGTTCTAGT
*   **  *  **  **** *
```

Consensus:

AaatTCcaGAAnaTTCTaGa

>All.fam\_Fam\_2\_12\_5 Nr. of seq. 5 Alignment length(with gaps) = 15 Alignment score = 0.737778

```
Cbren.WS247_Fam_8_12_37     GC--TT-AGGCTTAG
Rev.of:Cbrig.WS247_Fam_108_12_2 GC--TT-AGGCTTAG
Rev.of:Cele.WS201_Fam_2_12_203 GC--TT-AGGCTTAG
Rev.of:Crema.WS247_Fam_22_12_15 GC--TT-AGGCTTAG
Cbren.WS247_Fam_389_15_1    GCTTTTCAGGCTTAG
**  **  *****
```

Consensus:

GCTTAGGCTTAG (Telomere sequence)

>All.fam\_Fam\_5\_24\_4 Nr. of seq. 4 Alignment length(with gaps) = 24 Alignment score = 0.695602

```
Crema.WS247_Fam_73_21_4     T-TGGGTCATGACCTAA-TTAAT-
Rev.of:Cbrig.WS247_Fam_3_22_70 TCTAGGTCATGACCTAA--TTTTT
Rev.of:Cbren.WS247_Fam_10_24_31 TCTAGGTCATGACCTAATTTTTTTT
Cele.WS201_Fam_280_24_1     AGTAGGTCATGACCTAATTTTTTTA
*  *****  *  *
```

Consensus:

tcTaGGTCATGACCTAAttTttTt

>All.fam\_Fam\_7\_14\_4 Nr. of seq. 4 Alignment length(with gaps) = 17 Alignment score = 0.643791

```
Cbrig.WS247_Fam_19_14_12    TGGA-ATCT-GGA-ATC
Rev.of:Crema.WS247_Fam_13_14_26 CGGA-ATCC-GGA-ATC
Cbren.WS247_Fam_4_15_56     CGGA-ATCCNGGA-ATC
Cbren.WS247_Fam_15_16_22    CGGACATCT-GGACATC
*** **  *** **
```

Consensus:

cGGAATCcGGAATC

>All.fam\_Fam\_8\_14\_4 Nr. of seq. 4 Alignment length(with gaps) = 14 Alignment score = 0.857143

```
Cbren.WS247_Fam_24_12_14    AAG-CGGAAG-CGG
Cbren.WS247_Fam_21_14_15    AAGTCGGAAGTCGG
Rev.of:Cbrig.WS247_Fam_32_14_5 AAGTCGGAAGTCGG
Rev.of:Crema.WS247_Fam_1_14_208 AAGTCGGAAGTCGG
*** ***** **
```

Consensus:

AAGtCGGAAGtCGG

>All.fam\_Fam\_9\_12\_4 Nr. of seq. 4 Alignment length(with gaps) = 14 Alignment score = 0.750000

```
Cbren.WS247_Fam_400_12_1    GCTCCGGCTCCG--
Rev.of:Cele.WS201_Fam_356_12_1 GCTCCAGCTCCA--
Rev.of:Crema.WS247_Fam_61_12_5 GCTCCAGCTCCA--
Cbrig.WS247_Fam_20_14_12    GCTCCAGCTCCAGA
***** *****
```

Consensus:

GCTCCaGCTCCa

>All.fam\_Fam\_10\_14\_4 Nr. of seq. 4 Alignment length(with gaps) = 14 Alignment score = 0.777778

```
Cbren.WS247_Fam_84_14_4      TGTAGTTTGTAGTT
Rev.of:Cele.WS201_Fam_11_14_33  TGTAGTTTGTAGTT
Rev.of:Cbrig.WS247_Fam_266_14_1  CGTAGTATGTAGTT
Crema.WS247_Fam_146_14_2      TGTAGTCTGTAATC
                               ***** **
```

Consensus:

tGTAGTtTGTAgtT

>All.fam\_Fam\_11\_13\_4 Nr. of seq. 4 Alignment length(with gaps) = 13 Alignment score = 0.602564

```
Cbren.WS247_Fam_190_10_2      TTTTT-GAAAT--
Cele.WS201_Fam_40_12_7        TTTTT-GAAATTT
Rev.of:Crema.WS247_Fam_43_13_7  TTTTTTCAAATTT
Cele.WS201_Fam_18_11_14      TTTTTGCACAT--
                               ***** * **
```

Consensus:

TTTTTncAaATtt

>All.fam\_Fam\_12\_11\_4 Nr. of seq. 4 Alignment length(with gaps) = 12 Alignment score = 0.678241

```
Cbren.WS247_Fam_68_11_5      -TCGATAAAATTA
Rev.of:Cbrig.WS247_Fam_34_11_5  -CCGGTAAATTA
Crema.WS247_Fam_27_11_13      -CCGGTAAATTA
Rev.of:Cele.WS201_Fam_359_11_1  TCCG-TTAATTA
                               ** * *****
```

Consensus:

cCGgTaAATTA

>All.fam\_Fam\_13\_10\_4 Nr. of seq. 4 Alignment length(with gaps) = 10 Alignment score = 0.822222

```
Cbren.WS247_Fam_1_10_97      TAGAAGTTTC
Rev.of:Crema.WS247_Fam_18_10_16  TAGAAGTTTC
Rev.of:Cbrig.WS247_Fam_12_10_19  TGGAATTTTC
Rev.of:Cele.WS201_Fam_64_10_4    TGGAATTTTC
                               * ** * **
```

Consensus:

TaGAAgTTTC

>All.fam\_Fam\_23\_26\_3 Nr. of seq. 3 Alignment length(with gaps) = 28 Alignment score = 0.626984

```
Cbrig.WS247_Fam_59_24_3      AATTCCCGCCAAAATATTT----TTTTG
Cbren.WS247_Fam_3_28_64      AATTCCCGCCAAANTTTTTGAATTTTTG
Crema.WS247_Fam_123_26_2     AATTCCCGCCAAAACGGAA-AA-TTTTG
                               ***** **
```

Consensus:

AATTCCCGCCAAAatntttaaTTTTG

>All.fam\_Fam\_28\_22\_3 Nr. of seq. 3 Alignment length(with gaps) = 22 Alignment score = 0.621212

```
Crema.WS247_Fam_302_20_1      GTCGATTTACGG-AGCCTCGG-
Crema.WS247_Fam_48_21_6      GTNGATTTACGGAAGCTT-TGT
Rev.of:Cele.WS201_Fam_22_22_13  GTAGATTTACGGGAGTTTCTNT
                               ** ***** ** *
```

Consensus:

GTnGATTTACGGnAGctTctgt

>All.fam\_Fam\_31\_19\_3 Nr. of seq. 3 Alignment length(with gaps) = 21 Alignment score = 0.671958

```
Cbrig.WS247_Fam_68_19_3      -TAGAGGTCCCAAAAAAAT-
Crema.WS247_Fam_9_20_29      TTAGACGTCCCAAAAAACAN-
Rev.of:Cbren.WS247_Fam_5_20_44  -TCGAGGACCAAAAAA
                               * ** * ***** *
```

Consensus:

TaGAgGtCCCAAAAAaAn

>All.fam\_Fam\_33\_20\_3 Nr. of seq. 3 Alignment length(with gaps) = 21 Alignment score = 0.650794

```
Cele.WS201_Fam_17_20_14      TTTGAATTTTTNAGTCAAAA-
Rev.of:Crema.WS247_Fam_132_21_2  TTTGATATTTTCAGTCTAAAT
Crema.WS247_Fam_92_20_3      ATTGACTTTTTTGANTCGAAA-
                               ****  ****  *  *  **
```

Consensus:

tTTGAntTTTTnAgTCnAAA

>All.fam\_Fam\_34\_17\_3 Nr. of seq. 3 Alignment length(with gaps) = 18 Alignment score = 0.660494

```
Cbrig.WS247_Fam_71_17_3      T-CTCTTTTACTACCAAG
Rev.of:Cele.WS201_Fam_14_17_18  T-CTCTTTTACTACGNN
Crema.WS247_Fam_140_18_2      TCCTCATTTACTACCGAT
                               *  **  *****
```

Consensus:

TCTCtTTTACTACcgan

>All.fam\_Fam\_35\_17\_3 Nr. of seq. 3 Alignment length(with gaps) = 17 Alignment score = 0.790850

```
Cbren.WS247_Fam_35_17_9      CTCATTGACTACATTTA
Cele.WS201_Fam_15_17_17      CTCATTGACTACCTTTG
Crema.WS247_Fam_329_17_1     CTCTTTGACTACACTTG
                               ***  *****  **
```

Consensus:

CTCaTTGACTACatTTg

>All.fam\_Fam\_36\_16\_3 Nr. of seq. 3 Alignment length(with gaps) = 16 Alignment score = 0.694444

```
Cbren.WS247_Fam_17_16_20     TCTGTATGTCTGTATG
Rev.of:Crema.WS247_Fam_143_16_2  TCTGTCAGTCTGTGTG
Cbren.WS247_Fam_37_16_9      TCTGTCTATCTGTCTA
                               *****  *****  *
```

Consensus:

TCTGTctgTCTGTnTg

>All.fam\_Fam\_37\_16\_3 Nr. of seq. 3 Alignment length(with gaps) = 16 Alignment score = 0.666667

```
Cbren.WS247_Fam_30_16_11     CTCTCAGGCTCTCAGG
Cele.WS201_Fam_342_16_1      CTCCTAGGCTCCTAGG
Rev.of:Crema.WS247_Fam_145_16_2  CTTTTAGGCTTTTTAGG
                               **  *****  ***
```

Consensus:

CTcttAGGCTcttAGG

>All.fam\_Fam\_41\_15\_3 Nr. of seq. 3 Alignment length(with gaps) = 15 Alignment score = 0.940741

```
Cbren.WS247_Fam_16_15_20     GAAACCGGACATTTTC
Crema.WS247_Fam_33_15_9      GAAACCGGACATTTTC
Cbrig.WS247_Fam_14_15_16     GAAACCAGACATTTTC
                               *****  *****
```

Consensus:

GAAACCgGACATTTTC

>All.fam\_Fam\_42\_14\_3 Nr. of seq. 3 Alignment length(with gaps) = 14 Alignment score = 0.682540

```
Cbrig.WS247_Fam_269_12_1     G-CCCTAG-CCCTA
Rev.of:Crema.WS247_Fam_26_14_13  GACCCTAGACCCTA
Rev.of:Cele.WS201_Fam_349_14_1   GTCCCTAGTCCCTA
                               *  *****  **  **
```

Consensus:

GnCCCTAGnCCcTA

>All.fam\_Fam\_74\_23\_2 Nr. of seq. 2 Alignment length(with gaps) = 23 Alignment score = 0.659420

```
Crema.WS247_Fam_15_21_19     CTGAGGCTAACTGAGA-TTTTG-
Cele.WS201_Fam_123_22_2      CTGAGGCTCTCT-AGATTTTTGG
```

\*\*\*\*\* \*\* \*\* \*

Consensus:

CTGAGGCTaaCTgAGAtTTTTGg

>All.fam\_Fam\_85\_22\_2 Nr. of seq. 2 Alignment length(with gaps) = 22 Alignment score = 0.681818

Cbrig.WS247\_Fam\_5\_21\_47 CATTTCATGATTTT-TGGNC  
Cbren.WS247\_Fam\_55\_22\_6 CATTTC AAGGTTTCTAGGC  
\*\*\*\*\* \* \*\* \*

Consensus:

CATTTC AaGaTTTcTaGgC

>All.fam\_Fam\_91\_21\_2 Nr. of seq. 2 Alignment length(with gaps) = 21 Alignment score = 0.682540

Cbrig.WS247\_Fam\_8\_20\_31 AGCCTCAGTAAAAATTCC-TA  
Rev.of:Cele.WS201\_Fam\_320\_20\_1 AG-CTCAGGAAAAATTCCAGA  
\*\* \*\*\*\*\* \*

Consensus:

AGcCTCAGgAAAAATTCCagA

>All.fam\_Fam\_108\_19\_2 Nr. of seq. 2 Alignment length(with gaps) = 19 Alignment score = 0.789474

Cbren.WS247\_Fam\_358\_19\_1 GAAATGCGCCAAGACACAA  
Cele.WS201\_Fam\_16\_19\_15 GAATTGCGCCAAGGCACTA  
\*\*\* \*\*\*\*\* \*\* \*

Consensus:

GAAaTGCGCCAAGaCACaA

>All.fam\_Fam\_126\_16\_2 Nr. of seq. 2 Alignment length(with gaps) = 16 Alignment score = 0.718750

Cbrig.WS247\_Fam\_6\_14\_46 GGTCCCT-GGGTCCTG-  
Rev.of:Cbren.WS247\_Fam\_179\_16\_2 GGTTCCTGGGGTCCTGG  
\*\*\* \*\* \*\*\*\*\*

Consensus:

GGTcCTgGGGTCCTGg

>All.fam\_Fam\_133\_16\_2 Nr. of seq. 2 Alignment length(with gaps) = 16 Alignment score = 0.833333

Cbrig.WS247\_Fam\_21\_16\_12 GATCCAGGGATCCAGG  
Cele.WS201\_Fam\_87\_16\_3 GTTCCAGGGTTCAGG  
\* \*\*\*\*\* \*

Consensus:

GaTCCAGGGaTCCAGG

>All.fam\_Fam\_139\_14\_2 Nr. of seq. 2 Alignment length(with gaps) = 14 Alignment score = 0.809524

Cbrig.WS247\_Fam\_10\_14\_28 TCCTTATTCCTTAT  
Rev.of:Crema.WS247\_Fam\_4\_14\_69 TCCTTCTTCCTTCT  
\*\*\*\*\* \*\*\*\*\* \*

Consensus:

TCCTTaTTCCTTaT

>All.fam\_Fam\_141\_12\_2 Nr. of seq. 2 Alignment length(with gaps) = 12 Alignment score = 0.666667

Cbren.WS247\_Fam\_11\_10\_27 CC-GGT-CTGGT  
Rev.of:Cele.WS201\_Fam\_352\_12\_1 CCTGGTCCTGGT  
\*\* \*\* \*

Consensus:

CCtGGTcCTGGT

>All.fam\_Fam\_150\_10\_2 Nr. of seq. 2 Alignment length(with gaps) = 10 Alignment score = 0.733333

Cbren.WS247\_Fam\_31\_10\_10 GACCAGCCTA  
Cbrig.WS247\_Fam\_115\_10\_2 GACCATTCTA  
\*\*\*\*\* \*\* \*

Consensus:

GACCAGcCTA

## Table S7.

### Satellite families shared by *M. hapla* and *Caenorhabditis*

```
>Allfam_Fam_2_10_5 Nr. of seq. 5 Alignment length(with gaps) = 15 Alignment score = 0.480000
Cbren.WS247_Fam_190_10_2          TTTTT-GAAA--T--
Cele.WS201_Fam_40_12_7            TTTTT-GAAA--TTT
Rev.of:Crema.WS247_Fam_43_13_7    TTTTTTCAAA--TTT
Mhapla.WS247_Fam_303_10_1         TTTTC-GGAA--T--
Crema.WS247_Fam_7_12_32          TTTTC-GAAAGAT--
****      ** *

Consensus:

TTTTTtgaAAT

>Allfam_Fam_43_12_3 Nr. of seq. 3 Alignment length(with gaps) = 14 Alignment score = 0.674603
Cele.WS201_Fam_33_12_8            TAAA-AATAAAAA-
Crema.WS247_Fam_149_12_2         TAAC-AATAAAAA-
Mhapla.WS247_Fam_4_14_16         TAAANAATTAAAAAT
***  ***  ****

Consensus:

TAAaAATaAAAA

>Allfam_Fam_44_10_3 Nr. of seq. 3 Alignment length(with gaps) = 13 Alignment score = 0.632479
Cbren.WS247_Fam_61_10_6            A-AAAAAATCG--
Mhapla.WS247_Fam_301_11_1         ATAAAAAATCG--
Cbrig.WS247_Fam_107_12_2         A-AAAAAATTCGAC
*  *****  ***

Consensus:

AAAAAAaTCG

>Allfam_Fam_78_23_2 Nr. of seq. 2 Alignment length(with gaps) = 23 Alignment score = 0.652174
Cbren.WS247_Fam_335_21_1          CA-AATTTTTTTTCGGGA-TTTTT
Rev.of:Mhapla.WS247_Fam_103_23_2  CAGAATTTTTTTTCCCAAGTTTTT
**  *****      *  *****

Consensus:

CAgAATTTTTTTTccaAgTTTTT

>Allfam_Fam_87_22_2 Nr. of seq. 2 Alignment length(with gaps) = 22 Alignment score = 0.666667
Cbren.WS247_Fam_106_20_3          GGCAANTTGCCAGAGAAAAC--
Rev.of:Mhapla.WS247_Fam_263_22_1  GGCAATTTGCGACAAAAAACCCT
*****  *****  *  *  *****

Consensus:

GGCAAtTTGcCAcAaAAAAcct

>Allfam_Fam_98_22_2 Nr. of seq. 2 Alignment length(with gaps) = 22 Alignment score = 0.643939
Crema.WS247_Fam_291_21_1          AGGTGAAAAATTCAAATTTAT-
Rev.of:Mhapla.WS247_Fam_262_22_1  AAGTTTAAACTTTAAATTTATT
*  **  ***  **  *****

Consensus:

AaGTgaAAAaTTcAAATTTATt

>Allfam_Fam_99_21_2 Nr. of seq. 2 Alignment length(with gaps) = 21 Alignment score = 0.650794
Cbrig.WS247_Fam_16_19_14          AAATTCTG--GTCCTTAAAAA
Mhapla.WS247_Fam_112_21_2         AAATTCTGATGTTTTTAAACA
*****  **  *****  *

Consensus:

AAATTCTGatGTccTAAAAA

>Allfam_Fam_108_21_2 Nr. of seq. 2 Alignment length(with gaps) = 21 Alignment score = 0.682540
Cele.WS201_Fam_132_21_2          CAACTACCACAACACTACCGTAC
Rev.of:Mhapla.WS247_Fam_44_21_3   CTTCTACCACAACAACAGCAC
*  *****  **  *  **

Consensus:

CaaCTACCACAACaCaGcAC

>Allfam_Fam_110_20_2 Nr. of seq. 2 Alignment length(with gaps) = 20 Alignment score = 0.683333
Mhapla.WS247_Fam_50_18_3          NTTTTTA-TA-GGCCTAGAA
Rev.of:Cele.WS201_Fam_312_20_1    ATGTTTACTACGGCCTAGAA
*  ****  **  *****

Consensus:

aTgTTTAcTAcGGCCTAGAA
```



>Allfam\_Fam\_113\_20\_2 Nr. of seq. 2 Alignment length(with gaps) = 20 Alignment score = 0.641667  
Cele.WS201\_Fam\_24\_19\_12 TTTATTTATTTAATT-AATA  
Mhapla.WS247\_Fam\_30\_19\_4 TTTATTTTATAATTCAAG-  
\*\*\*\*\* \* \*\*\*\*\* \*\*

Consensus:  
TTTATTTaTaTAATTcAAga

>Allfam\_Fam\_114\_20\_2 Nr. of seq. 2 Alignment length(with gaps) = 20 Alignment score = 0.633333  
Mhapla.WS247\_Fam\_276\_19\_1 TTTTAT-TATTCGTGCGCTC  
Crema.WS247\_Fam\_94\_20\_3 TTTTCTGTATTCTTGTGCAC  
\*\*\*\* \* \*\*\*\*\* \*\* \* \*

Consensus:  
TTTTaTgTATTCgTGcGCaC

>Allfam\_Fam\_122\_19\_2 Nr. of seq. 2 Alignment length(with gaps) = 19 Alignment score = 0.754386  
Cbrig.WS247\_Fam\_244\_18\_1 TTTTGAAAAAAAAAATT-T  
Mhapla.WS247\_Fam\_114\_19\_2 TTTTGAAAGAAAAGAATTAT  
\*\*\*\*\* \*\*\*\*\* \*\* \*

Consensus:  
TTTTGAAaAAAAaAATTaT

>Allfam\_Fam\_133\_18\_2 Nr. of seq. 2 Alignment length(with gaps) = 18 Alignment score = 0.629630  
Cele.WS201\_Fam\_323\_18\_1 TTGTAGATCAACGGGGTC  
Rev.of:Mhapla.WS247\_Fam\_52\_18\_3 TTGTGGTCAATGGTGGC  
\*\*\*\* \* \*\*\*\*\* \*\* \* \*

Consensus:  
TTGTaGaTCAAcGGgGgC

>Allfam\_Fam\_145\_16\_2 Nr. of seq. 2 Alignment length(with gaps) = 16 Alignment score = 0.708333  
Mhapla.WS247\_Fam\_57\_15\_3 ATAATTTTAAGCTT-T  
Cbrig.WS247\_Fam\_250\_16\_1 AAAATTTTAGGCTTGT  
\* \*\*\*\*\* \*\* \*

Consensus:  
AaAATTTTAAgCTTgT

>Allfam\_Fam\_151\_16\_2 Nr. of seq. 2 Alignment length(with gaps) = 16 Alignment score = 0.666667  
Cele.WS201\_Fam\_88\_16\_3 AATTCCGCAATCGGC  
Rev.of:Mhapla.WS247\_Fam\_282\_16\_1 AATTTTCGGGAAACGGG  
\*\*\*\* \*\* \*\* \*\*

Consensus:  
AATTcCGGcAAcCGGc

>Allfam\_Fam\_152\_15\_2 Nr. of seq. 2 Alignment length(with gaps) = 15 Alignment score = 0.655556  
Mhapla.WS247\_Fam\_299\_13\_1 AATTTTGTG-GC-ATT  
Cbrig.WS247\_Fam\_263\_14\_1 AATTTTGTGCTAT-  
\*\*\*\*\* \*\* \*\*

Consensus:  
AATTTTGTgGctAtT

>Allfam\_Fam\_154\_15\_2 Nr. of seq. 2 Alignment length(with gaps) = 15 Alignment score = 0.655556  
Cbren.WS247\_Fam\_181\_14\_2 TCAATAATCAATAA-  
Rev.of:Mhapla.WS247\_Fam\_292\_15\_1 TCGATAATAAAAAAG  
\*\* \*\*\*\*\* \*\* \*\*

Consensus:  
TCaATAATaAAaAAg

>Allfam\_Fam\_157\_14\_2 Nr. of seq. 2 Alignment length(with gaps) = 14 Alignment score = 0.642857  
Cele.WS201\_Fam\_28\_12\_9 CTACCTACCTAT--  
Rev.of:Mhapla.WS247\_Fam\_295\_14\_1 CTACCTATATATTA  
\*\*\*\*\* \*\* \*

Consensus:  
CTACCTAcaTATta

>Allfam\_Fam\_160\_14\_2 Nr. of seq. 2 Alignment length(with gaps) = 14 Alignment score = 0.714286  
Cele.WS201\_Fam\_89\_14\_3 AATTTTAAATTGGA  
Rev.of:Mhapla.WS247\_Fam\_294\_14\_1 AATTACAAATTGTA  
\*\*\*\* \*\*\*\*\* \*

Consensus:  
AATTacAAATTGgA

>Allfam\_Fam\_162\_13\_2 Nr. of seq. 2 Alignment length(with gaps) = 13 Alignment score = 0.641026  
Cele.WS201\_Fam\_353\_12\_1 AGTTATAT-AGTA  
Rev.of:Mhapla.WS247\_Fam\_298\_13\_1 AGTTATATGAGGG  
\*\*\*\*\* \*\*

Consensus:

AGTTATATgAGga

>Allfam\_Fam\_165\_12\_2 Nr. of seq. 2 Alignment length(with gaps) = 12 Alignment score = 0.694444  
Crema.WS247\_Fam\_35\_10\_9 TTAATTTTAA--  
Rev.of:Mhapla.WS247\_Fam\_10\_12\_8 ATAATTTTAA  
\*\*\*\*\*

Consensus:

aTAATTTTAAa

>Allfam\_Fam\_166\_12\_2 Nr. of seq. 2 Alignment length(with gaps) = 12 Alignment score = 0.722222  
Mhapla.WS247\_Fam\_302\_11\_1 CAGAATATA-AC  
Rev.of:Cele.WS201\_Fam\_143\_12\_2 CAGAATATATTC  
\*\*\*\*\* \*

Consensus:

CAGAATATAtaC

>Allfam\_Fam\_168\_11\_2 Nr. of seq. 2 Alignment length(with gaps) = 11 Alignment score = 0.696970  
Crema.WS247\_Fam\_347\_10\_1 TCGC-TATCTT  
Mhapla.WS247\_Fam\_126\_11\_2 TCGCATAACTT  
\*\*\*\* \*\* \*\*

Consensus:

TCGCaTaaCTT

>Allfam\_Fam\_170\_11\_2 Nr. of seq. 2 Alignment length(with gaps) = 11 Alignment score = 0.651515  
Mhapla.WS247\_Fam\_304\_10\_1 GCAAATATTT-  
Cele.WS201\_Fam\_18\_11\_14 GCACATTTTTT  
\*\*\* \*\* \*\*

Consensus:

GCAaATaTTTT

**Table S8. The microsatellites in *Caenorhabditis***

| Species           | A  | AT               | AC               | AG                | W                   | AAT             | AAC | ATC | ACT | AAG              | AGG | ACC | AGC | ACG | CCG | CG | C  |
|-------------------|----|------------------|------------------|-------------------|---------------------|-----------------|-----|-----|-----|------------------|-----|-----|-----|-----|-----|----|----|
| <i>C.elegans</i>  | 50 | 255 <sup>*</sup> | 125 <sup>*</sup> | 185 <sup>*</sup>  | 12097 <sup>*</sup>  | 31              | 4   | 13  | 5   | 24               | 10  | 4   | 6   | 11  | 0   | 0  | 27 |
| <i>C.briggsae</i> | 8  | 118 <sup>*</sup> | 115 <sup>*</sup> | 1457 <sup>*</sup> | 3389 <sup>*</sup>   | 25              | 7   | 15  | 1   | 220 <sup>*</sup> | 4   | 1   | 1   | 0   | 0   | 0  | 2  |
| <i>C.remanei</i>  | 22 | 146 <sup>*</sup> | 19               | 182 <sup>*</sup>  | 4274 <sup>*</sup>   | 32 <sup>*</sup> | 17  | 4   | 2   | 72 <sup>*</sup>  | 5   | 0   | 2   | 5   | 0   | 0  | 6  |
| <i>C.brenneri</i> | 59 | 127 <sup>*</sup> | 49 <sup>*</sup>  | 1848 <sup>*</sup> | 2875 <sup>*</sup>   | 14 <sup>*</sup> | 14  | 20  | 2   | 101 <sup>*</sup> | 13  | 3   | 3   | 3   | 0   | 0  | 7  |
| <i>M.hapla</i>    | 23 | 9                | 0                | 0                 | 101176 <sup>*</sup> | 6               | 1   | 0   | 0   | 4                | 1   | 0   | 0   | 0   | 0   | 0  | 8  |

Number of repeats longer than 24 bases found for each motif. Values in both strands are added. The superscript (\*) indicates that the maximum length is longer than 95 nucleotides.
